# Supplementary material for: Aqueous assembly of a (pseudo)rotaxane with a donor–π–acceptor axis formed by a Knoevenagel condensation
Source: Royal Society of Chemistry journal article supplement (doi:10.1039/d1qo00643f), 2021-01-01
Supplement: d1qo00643f1.pdf [file d1qo00643f1.pdf]

## Electronic Supporting Information

|                                                                                        |    |
|----------------------------------------------------------------------------------------|----|
| <sup>1</sup> H-NMR spectra of pseudorotaxane <b>3c2</b> .....                          | 2  |
| <sup>1</sup> H-NMR spectra of pseudorotaxane <b>1fc2</b> .....                         | 4  |
| <sup>1</sup> H-NMR spectra of pseudorotaxane <b>9c2</b> .....                          | 7  |
| <sup>1</sup> H-NMR competition experiment of <b>1f</b> , <b>9</b> , and <b>2</b> ..... | 9  |
| Determination of the association constant of <b>1fc2</b> .....                         | 10 |
| NOE showing <i>E</i> -selective formation of <b>1f</b> .....                           | 12 |
| Optical Spectra of <b>1a</b> , <b>1f</b> , <b>1e</b> , and <b>1ec2</b> .....           | 13 |
| Quantum Yield Determination for <b>1e</b> and <b>1ec2</b> .....                        | 15 |
| Unedited Photographs of Solid-State Emission and Emission Spectra .....                | 18 |
| Deslipping Experiments of <b>1ec2</b> .....                                            | 20 |
| Reversibility of the Knoevenagel Condensation .....                                    | 21 |
| Supplementary Reaction Schemes .....                                                   | 23 |
| Experimental Procedures .....                                                          | 24 |
| References .....                                                                       | 31 |
| NMR Spectra .....                                                                      | 32 |
| HR-MS Spectra .....                                                                    | 52 |

## <sup>1</sup>H-NMR spectra of pseudorotaxane 3⊂2

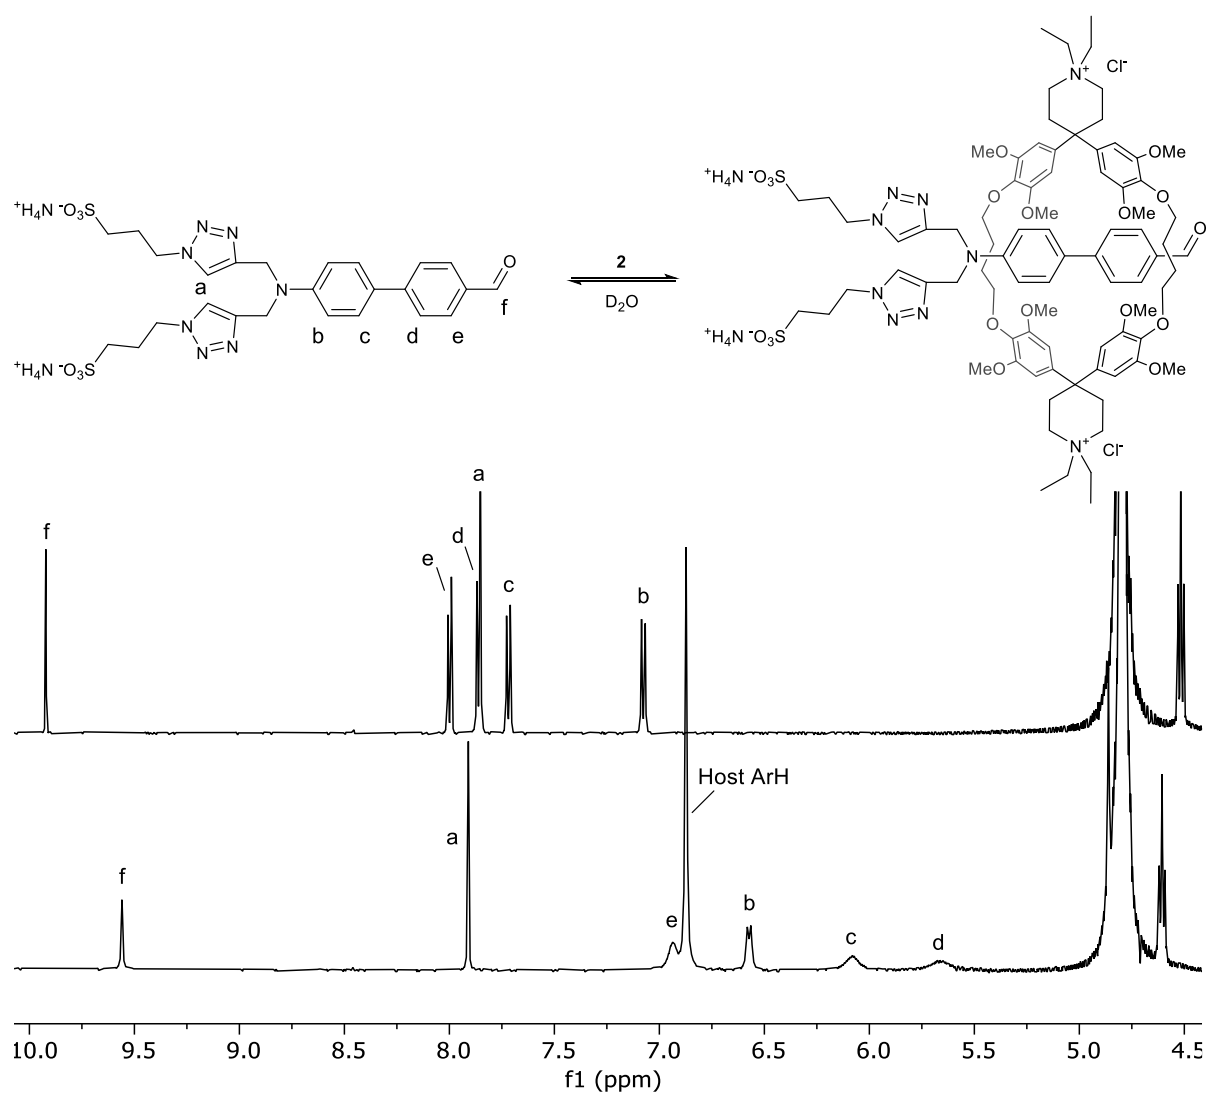

Scheme S1: Equilibrium of free guest **3** and host **2**, and the pseudorotaxane **3⊂2** in D<sub>2</sub>O (top). Assignment of the aromatic <sup>1</sup>H signals to the free guest (1 mM in D<sub>2</sub>O) and **3⊂2** (1:1 mixture, 1 mM in D<sub>2</sub>O) in the respective <sup>1</sup>H-NMR spectra (bottom, 500 MHz).

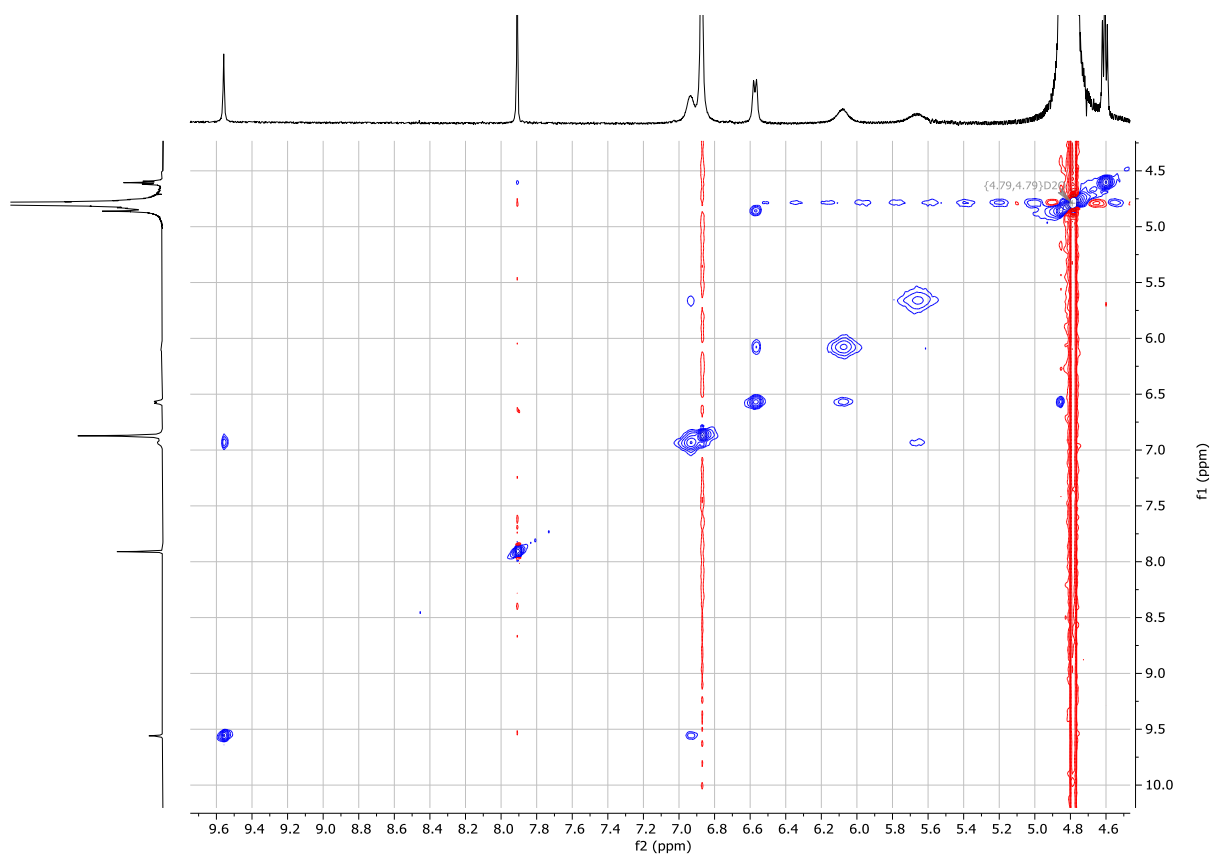

Figure S1: Excerpt of the  $^1\text{H}$ -NOESY 2D-NMR spectrum (500 MHz) of the pseudorotaxane **3C2** at 1 mM concentration in  $\text{D}_2\text{O}$ .

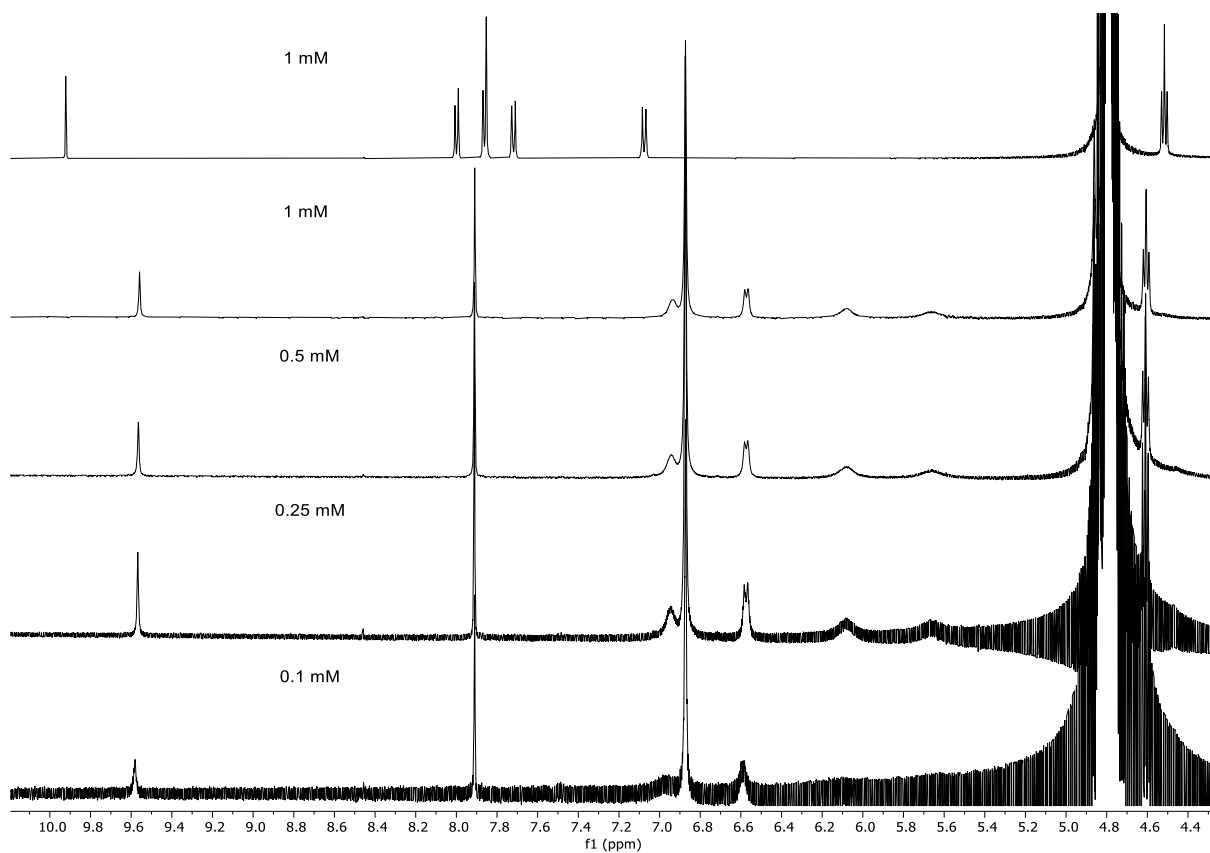

Figure S2:  $^1\text{H}$ -NMR spectra (500 MHz) of guest **3** at 1 mM concentration in  $\text{D}_2\text{O}$  (top) and equimolar mixtures with the host **2** at decreasing concentrations.

## <sup>1</sup>H-NMR spectra of pseudorotaxane **1f**⊂**2**

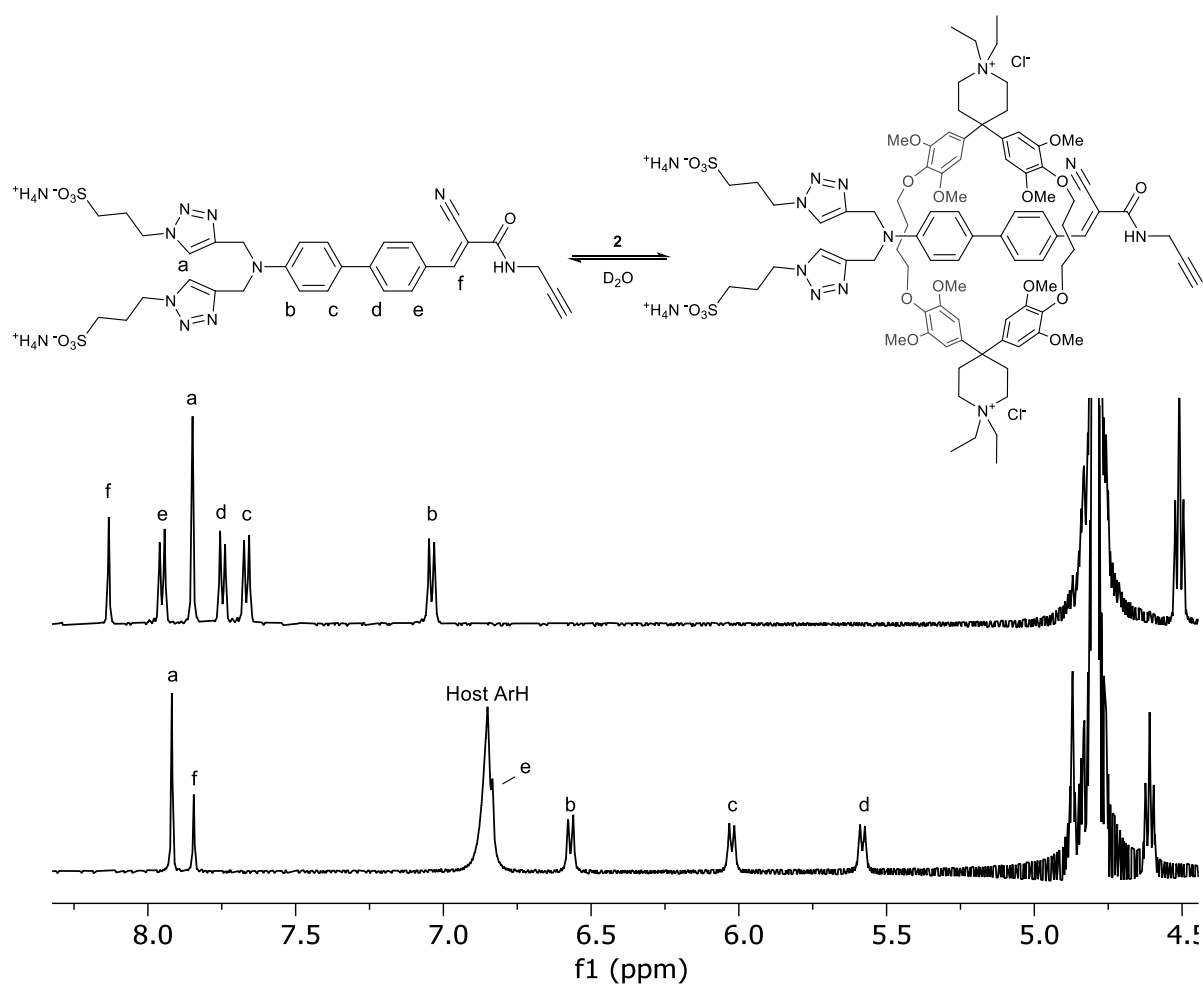

Scheme S2: Equilibrium of free guest **1f** and host **2**, and the pseudorotaxane **1f**⊂**2** in D<sub>2</sub>O (top). Assignment of the aromatic <sup>1</sup>H signals to the free guest (1 mM in D<sub>2</sub>O) and **1f**⊂**2** (1:1 mixture, 1 mM in D<sub>2</sub>O) in the respective <sup>1</sup>H-NMR spectra (bottom, 500 MHz).

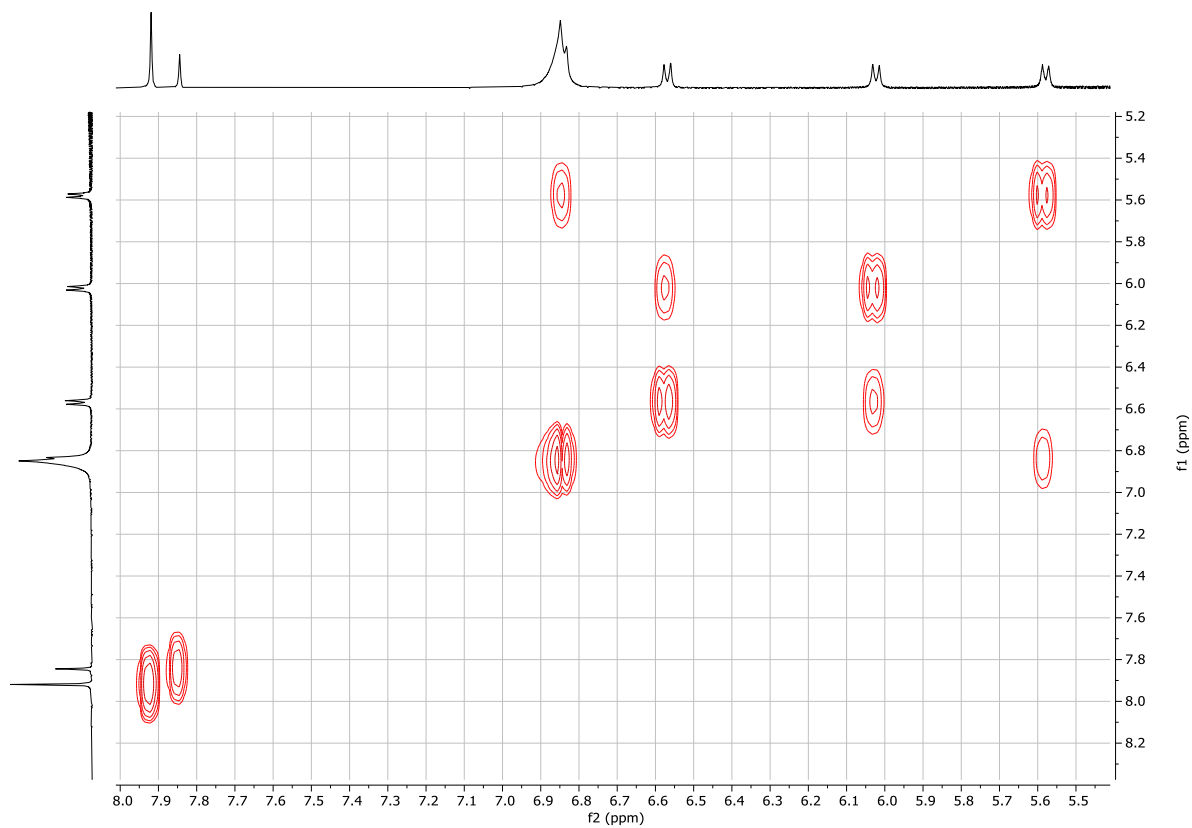

Figure S3:  $^1\text{H}$ -COSY 2D-NMR spectrum (500 MHz) of the pseudorotaxane **1fc2** at 1 mM concentration in  $\text{D}_2\text{O}$ .

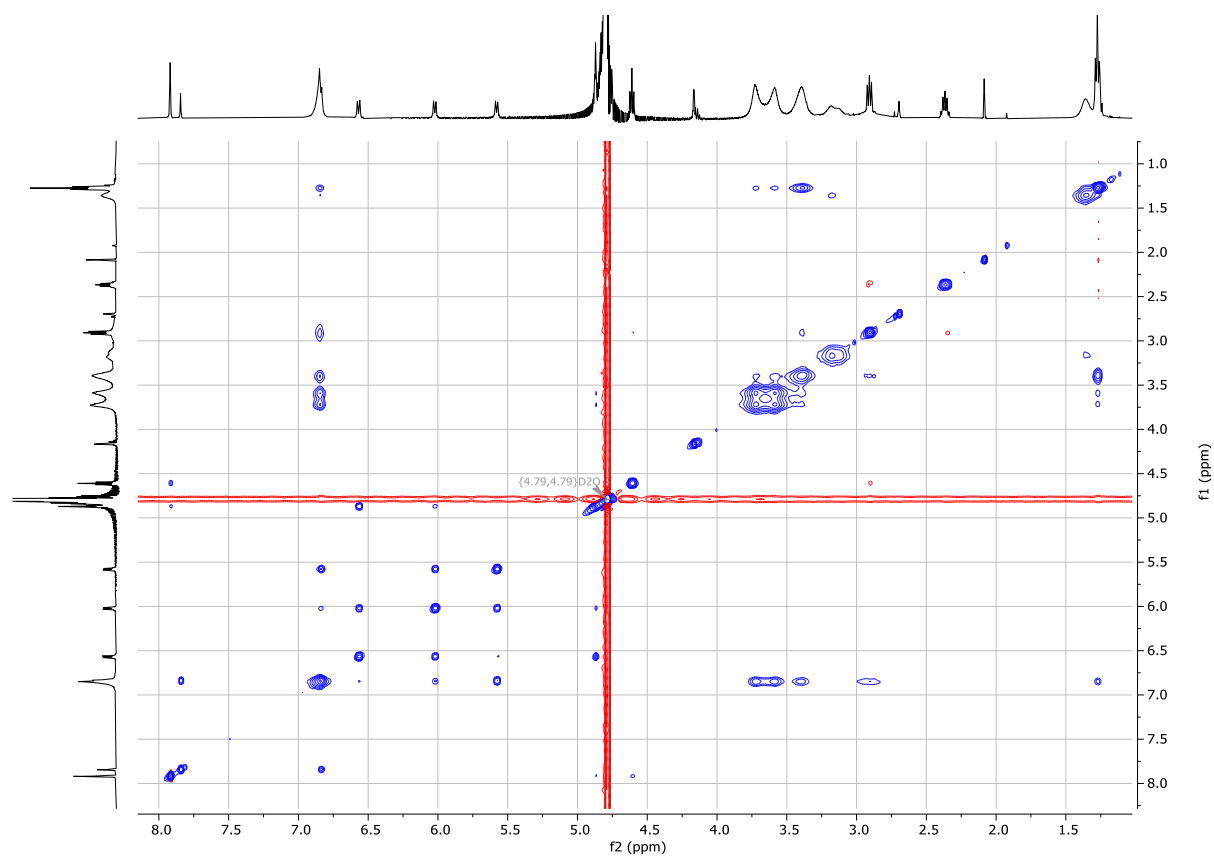

Figure S4:  $^1\text{H}$ -NOESY 2D-NMR spectrum (500 MHz) of the pseudorotaxane **1fc2** at 1 mM concentration in  $\text{D}_2\text{O}$ .

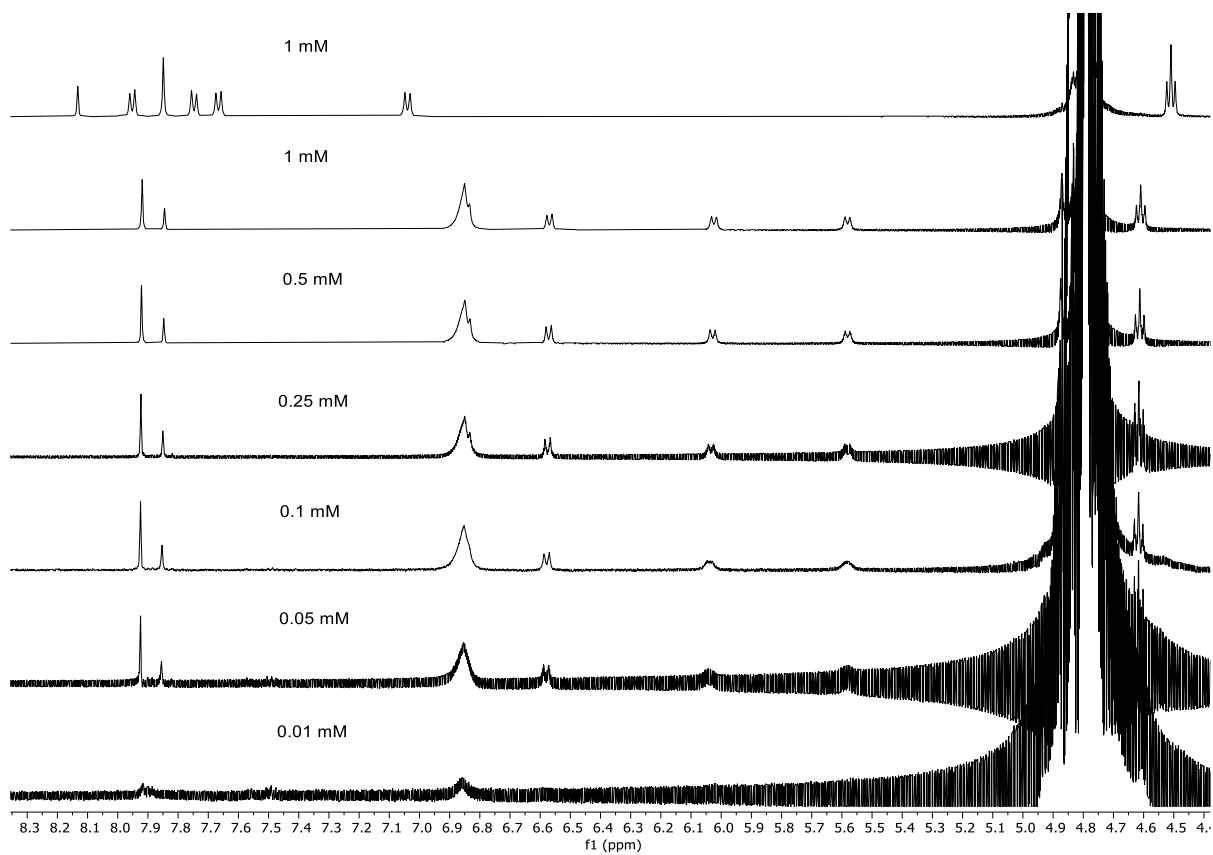

Figure S5: <sup>1</sup>H-NMR spectra (500 MHz) of guest **1f** at 1 mM concentration in D<sub>2</sub>O (top) and equimolar mixtures with the host **2** at decreasing concentrations.

## <sup>1</sup>H-NMR spectra of pseudorotaxane **9**⊂**2**

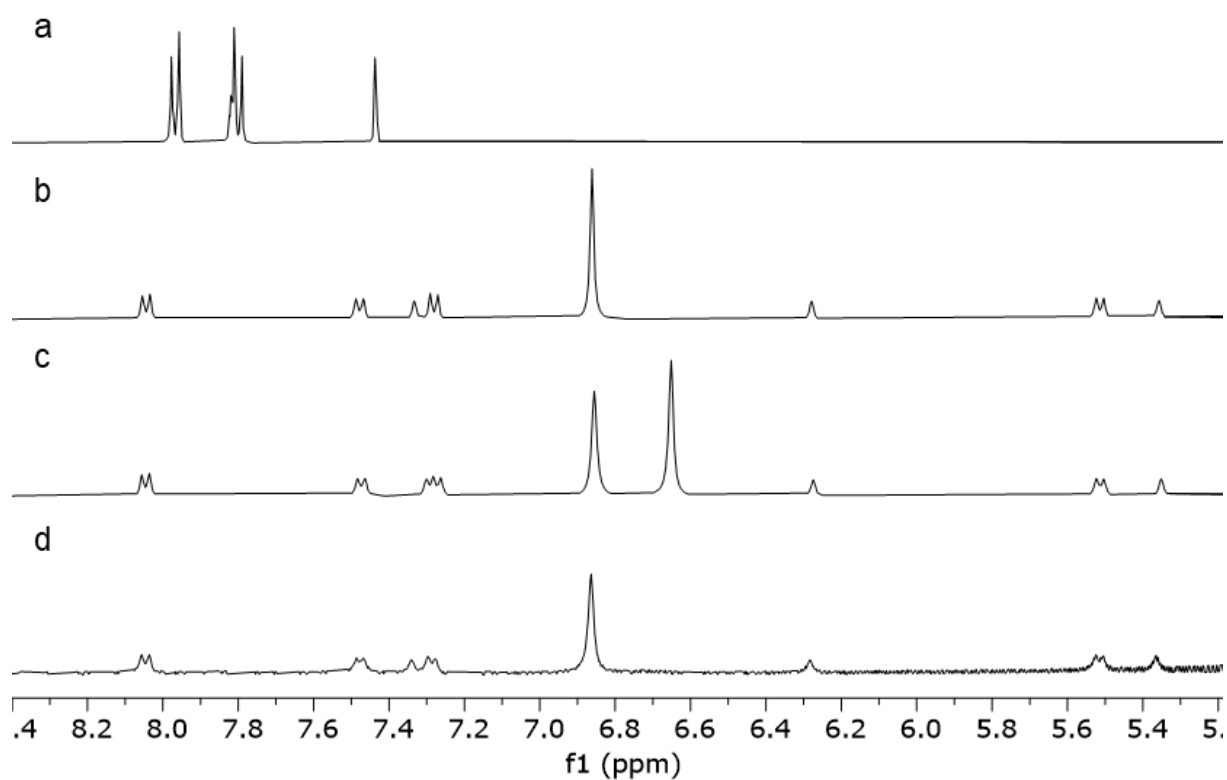

Figure S6: <sup>1</sup>H-NMR spectra (400 MHz) in D<sub>2</sub>O of a) stopper **9** at 0.5 mM concentration, b) equimolar mixture of **2** and **9** at 0.5 mM concentration, c) a 2:1 mixture of **2** and **9** at 1 mM and 0.5 mM concentration, respectively, and d) equimolar mixture of **2** and **9** at 0.1 mM concentration.

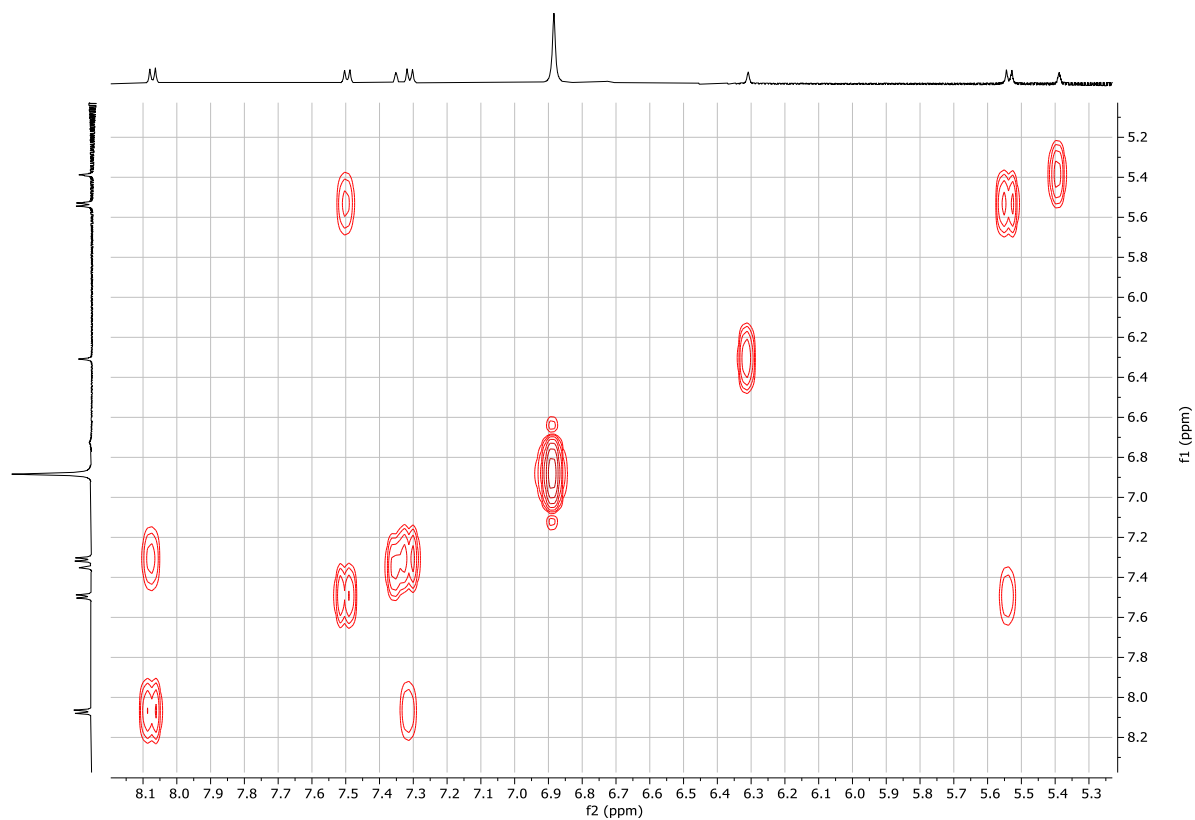

Figure S7: <sup>1</sup>H-COSY NMR spectrum (500 MHz) of the pseudorotaxane **9**⊂**2** at 1 mM concentration in D<sub>2</sub>O.

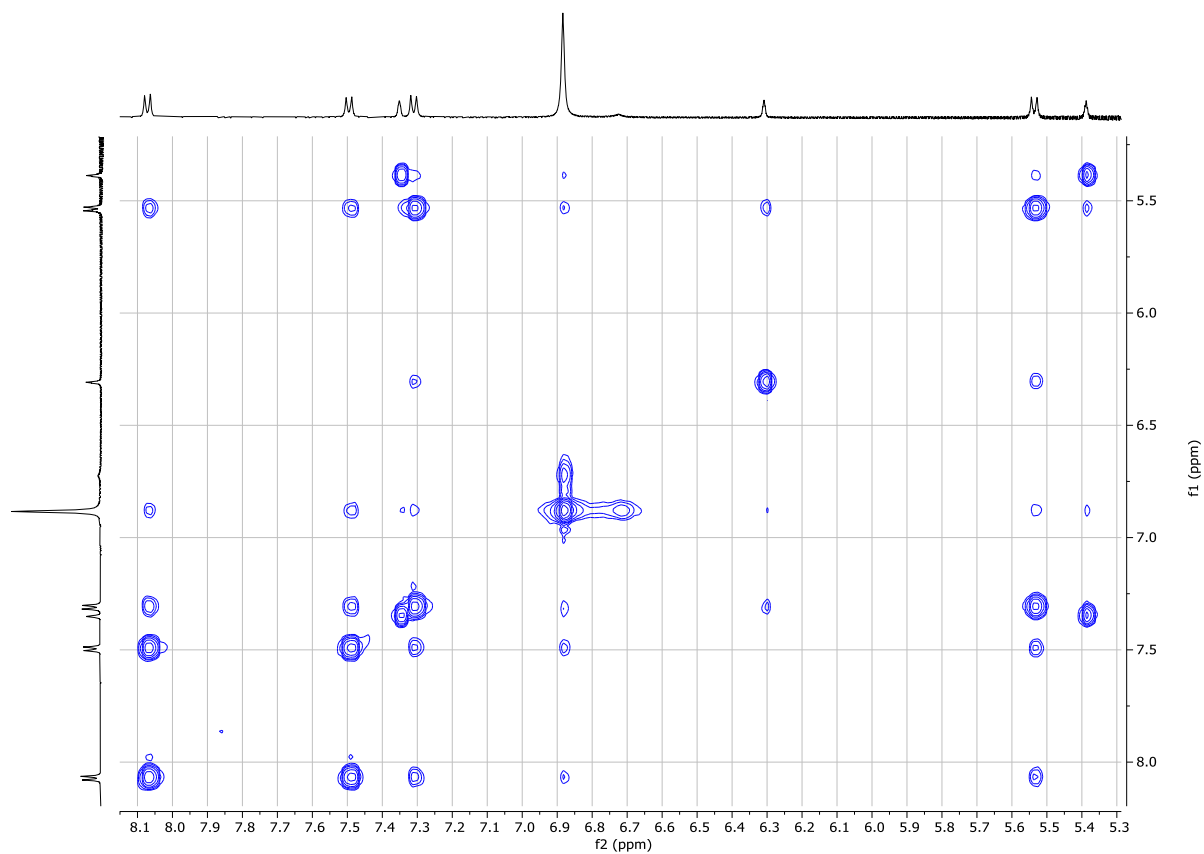

Figure S8:  $^1\text{H}$ -NOESY NMR spectrum (500 MHz) of the pseudorotaxane **9c2** at 1 mM concentration in  $\text{D}_2\text{O}$ . Due to the symmetry of the guest molecule and the interchange between the two (identical) positions of the macrocyclic host, exchange signals can be observed along with the intended NOE signals. Due to the molecular weight of the pseudorotaxane, both the EXSY and NOESY signals are in the same phase.

## <sup>1</sup>H-NMR competition experiment of **1f**, **9**, and **2**

For the <sup>1</sup>H-NMR competition experiment shown in Figure S9e, the chromophore **1f**, stopper **9**, and macrocyclic host **2** were mixed in D<sub>2</sub>O in a 1:1:1 ratio to have each component present at 0.5 mM concentration. As a comparison, the <sup>1</sup>H-NMR spectra of free **1f** and **9** are shown in Figure S9a/S9b, and the spectra of **1f****c2** and **9c2** are shown in Figure S9c/S9d. Figure S9e shows the presence of both free stopper **9** (e.g., 7.78 ppm and 7.98 ppm) and its threaded pseudorotaxane state (e.g., 5.35 ppm, 5.50 ppm, 6.28 ppm). Free **1f** cannot be observed clearly, although some broadened peaks are barely protruding from the baseline. The pseudorotaxane **1f****c2** also gives broadened signals, the signals at 5.55, 5.98, and 6.55 ppm indicate its formation. The broadening of the signals complicates the determination of the ratio of formed supramolecular species. Nonetheless, the presence of both pseudorotaxanes simultaneously implies a similar association constant for the two equilibria.

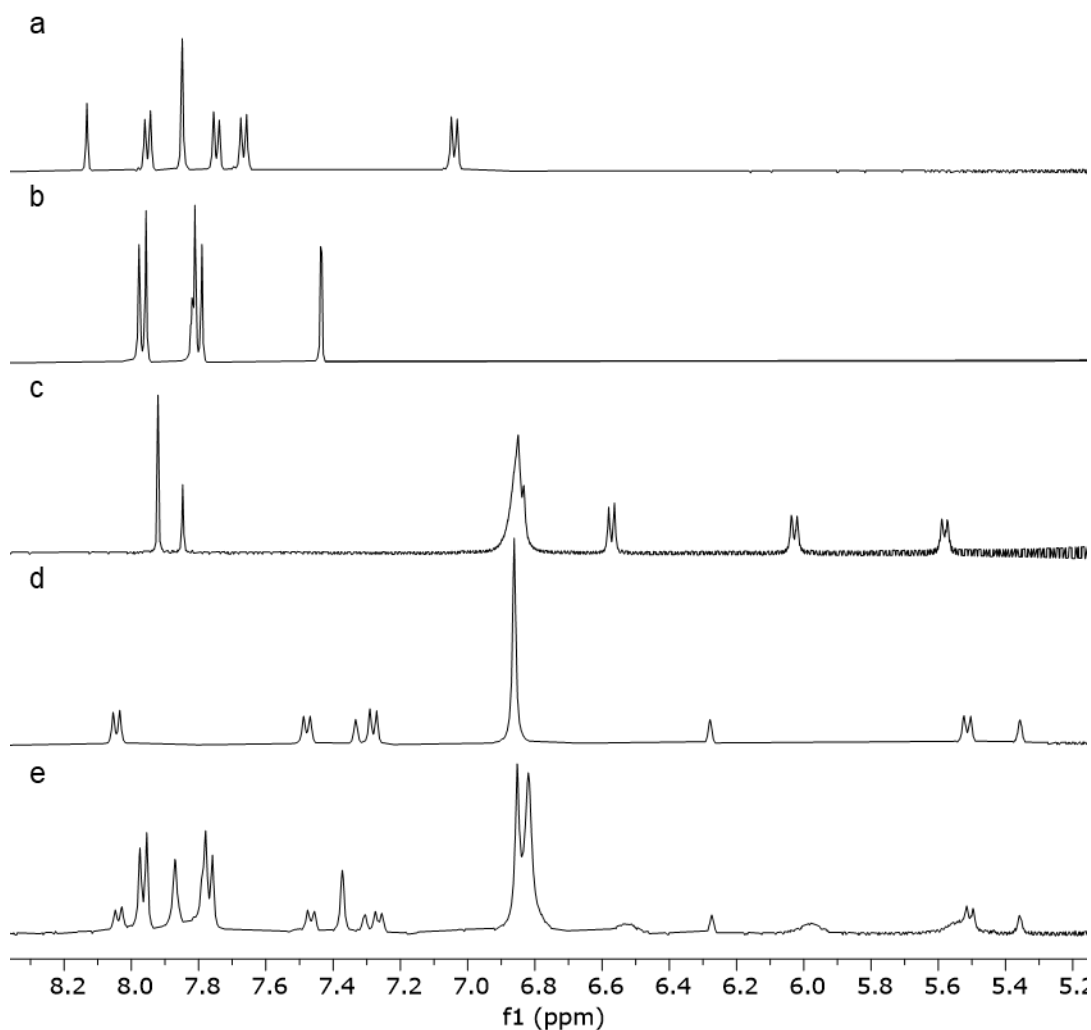

Figure S9: <sup>1</sup>H-NMR spectra (a and c were recorded at 500 MHz frequency; b, d, and e at 400 MHz) of D<sub>2</sub>O solutions at 0.5 mM concentration of a) **1f**, b) **9**, c) **1f****c2**, d) **9c2**, e) **1f**, **9**, **2** (1:1:1). The competition experiment in e) shows significantly broadened signals of the pseudorotaxane **1f****c2** (visible in spectrum c), and sharp signals of both the free **9** (b) and pseudorotaxane **9c2** visible in d.

## Determination of the association constant of $1f \subset 2$

As NMR spectroscopy was not suited for the determination of the  $K_a$  of the equilibrium shown in Scheme S2 in water, we used optical means to monitor the change. At the chosen chromophore concentration of  $2.05 \times 10^{-6}$  M, which was kept constant throughout the titration, addition of a solution of **2** showed relatively small changes in the absorption spectrum (Figure S10) and a significant increase in emission intensity when excited at 400 nm wavelength (Figure S11). In both wavelength regions **2** is spectroscopically “silent” and gives no signal. Fluorescence spectra proved to give more reliable data in this concentration range and was chosen to determine the  $K_a$  of the equilibrium. The obtained data was fitted at four wavelengths (640 nm, 650 nm, 660 nm, 670 nm) using the publicly available Matlab script written by P. Thordarson<sup>1</sup> for 1:1 binding (Figure S12).  $K_a$  was determined to be  $1.5 \times 10^7$  M<sup>-1</sup> with a 2.9% confidence interval determined by asymptotic error and standard error of the y estimate of 0.116. The difference  $k_{\Delta HG}$  of the two proportionality constants  $k_{HG}$  and  $k_H$  was calculated to be  $1.6 \times 10^7$  at 640 nm wavelength, while at the other three wavelengths the  $k_{\Delta HG}$  is  $1.7 \times 10^7$ , with 0.2% confidence interval determined by asymptotic error.

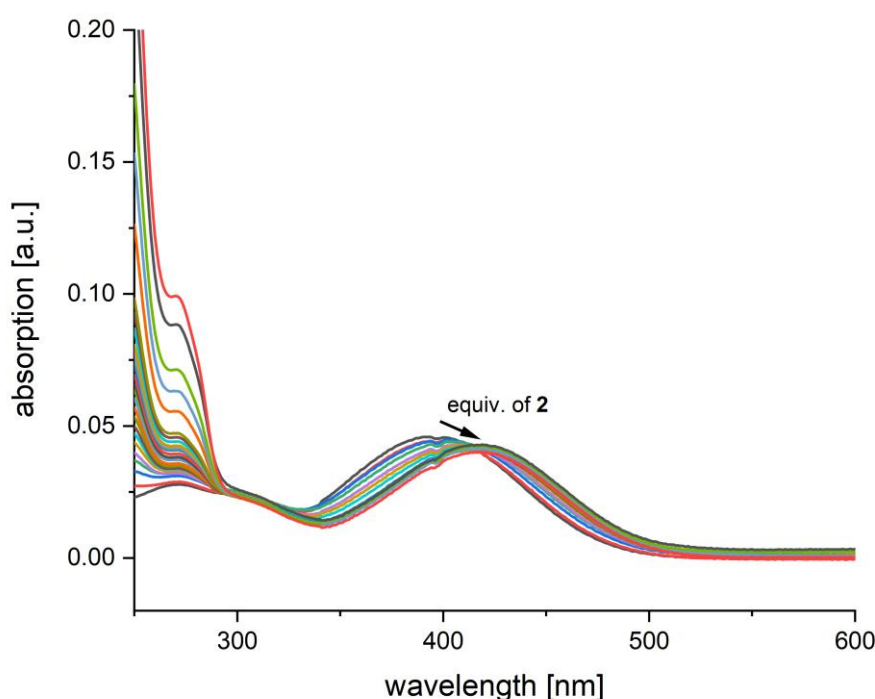

Figure S10: Changes in absorption induced by complexation of **1f** with **2** in aqueous solution, with the arrow indicating the direction of the shift upon addition of **2**.

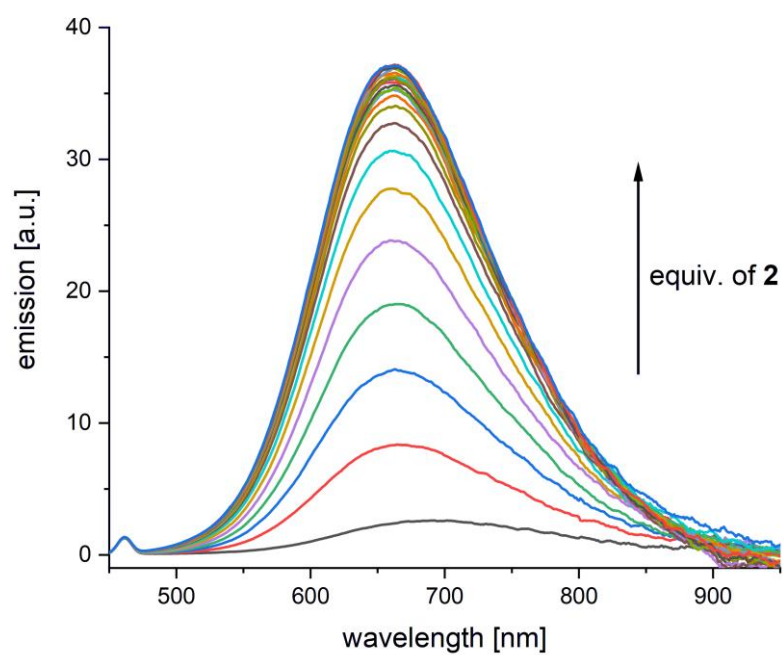

Figure S11: Changes in emission induced by complexation of **1f** with **2** in aqueous solution, with the arrow indicating the increase in emission upon addition of **2**.

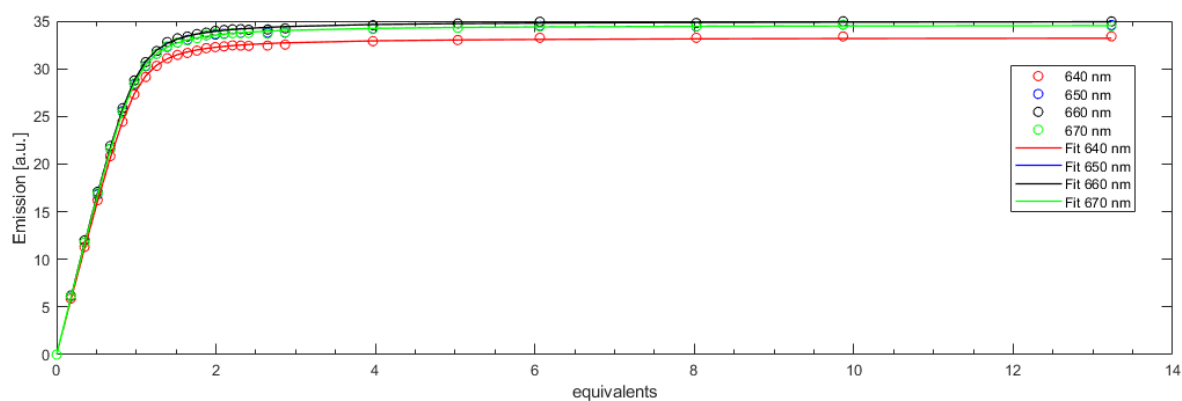

Figure S12: Data points and the calculated fit for all four wavelengths used to calculate  $K_a$ .

## NOE showing *E*-selective formation of **1f**

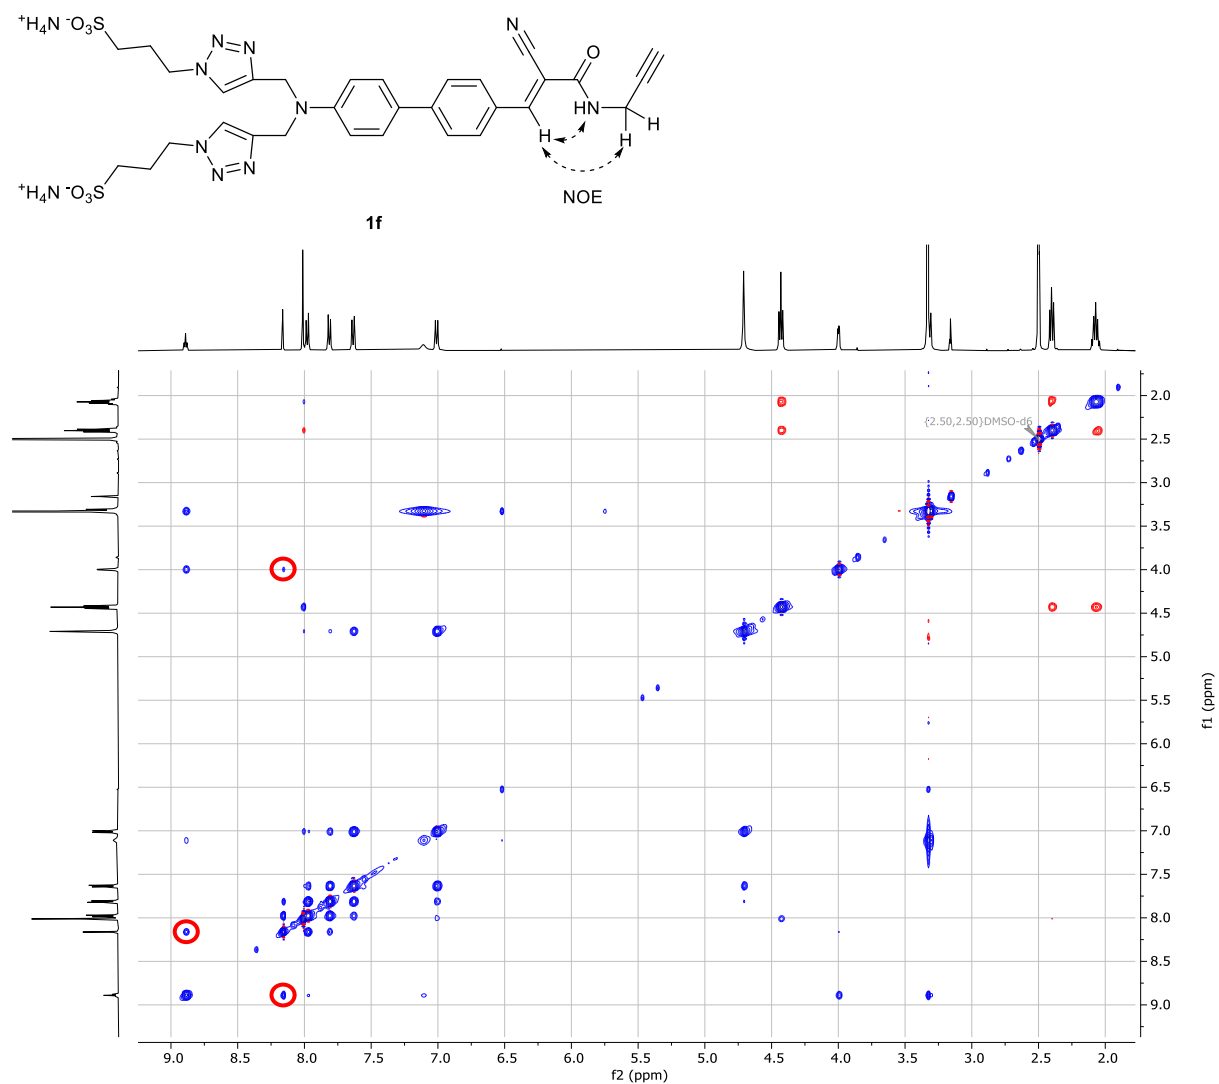

Figure S13: <sup>1</sup>H-NOESY NMR spectrum (500 MHz) of **1f** in DMSO-d<sub>6</sub>. Red circles highlight NOEs indicated with dashed arrows in the structure, proving the formation of the *E* isomer.

## Optical Spectra of **1a**, **1f**, **1e**, and **1e**2

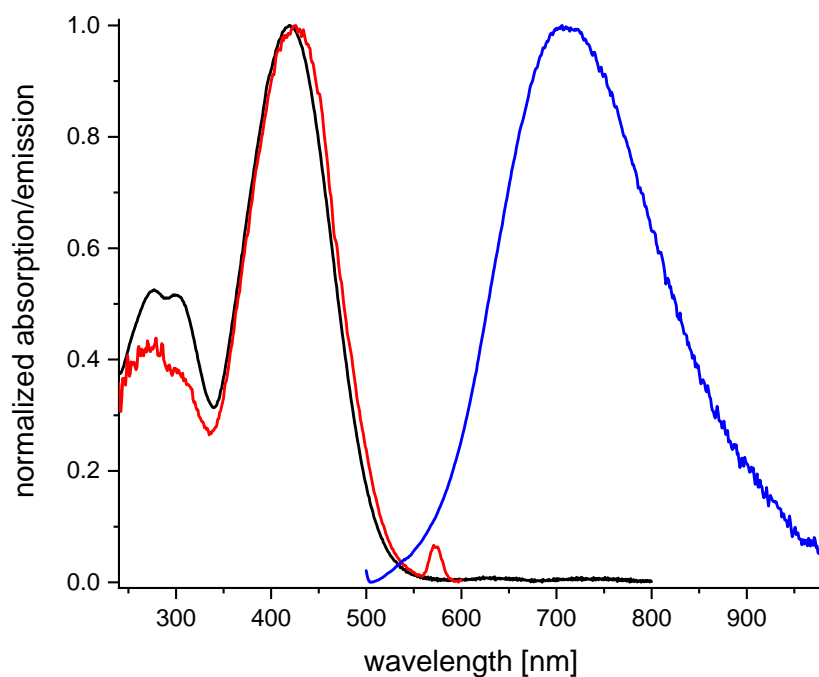

Figure S14: Absorption (black), excitation (red), and emission (blue) spectra of **1a** in H<sub>2</sub>O. The emission spectrum was measured with 420 nm excitation light. The excitation spectrum was measured for emission at 710 nm wavelength. The Stokes' shift between the two maxima (420 nm and 710 nm, respectively) is  $\sim 9725$  cm<sup>-1</sup>. The small peak in the excitation spectrum at 570 nm is a scattering artifact.

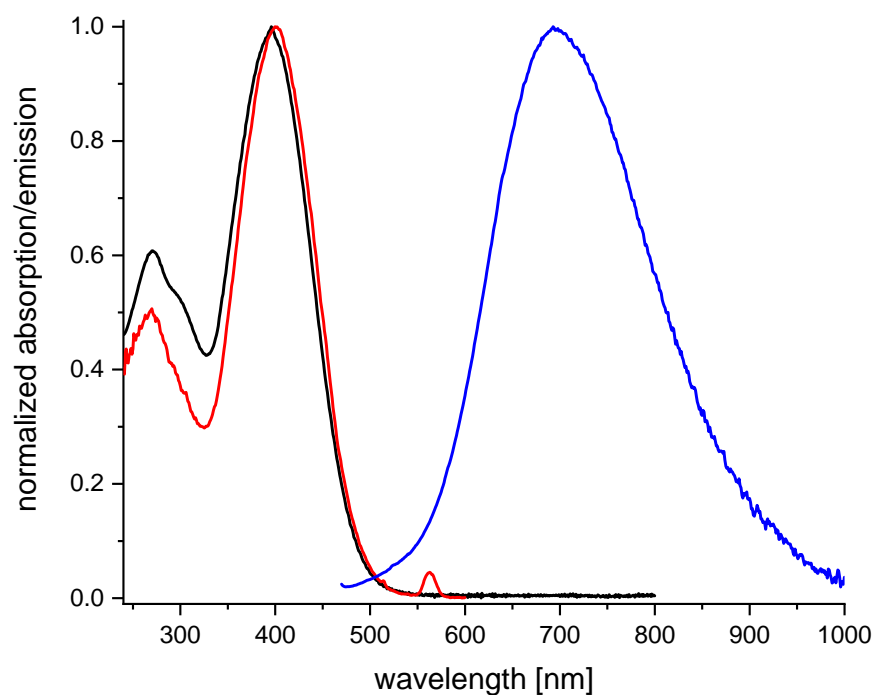

Figure S15: Absorption (black), excitation (red), and emission (blue) spectra of **1f** in H<sub>2</sub>O. The emission spectrum was measured with 396 nm excitation light. The excitation spectrum was measured for emission at 695 nm wavelength. The Stokes' shift between the two maxima (396 nm and 693 nm, respectively) is  $\sim 10820$  cm<sup>-1</sup>. The small peak in the excitation spectrum at 560 nm is a scattering artifact.

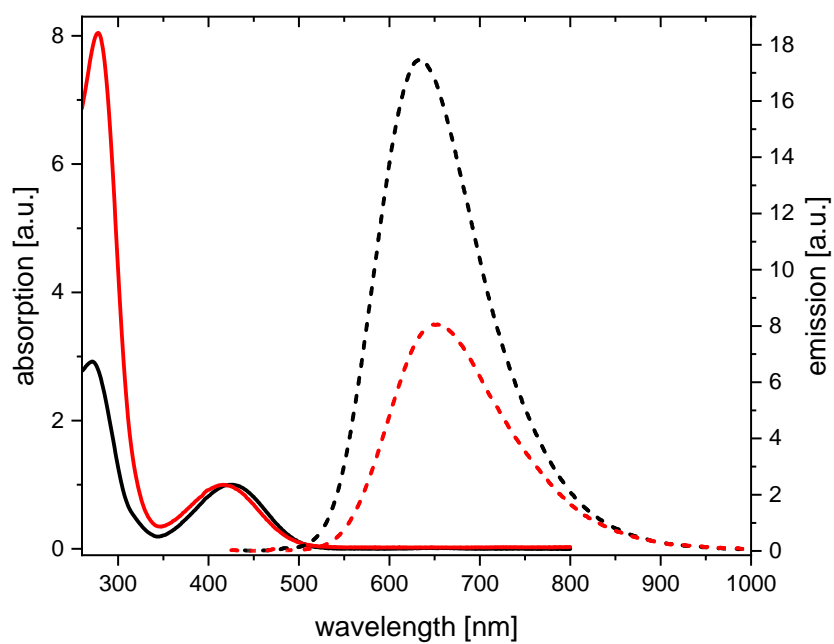

Figure S16: Absorption (solid lines) and emission (dashed lines) spectra of **1ec2** (black) and **1e** (green) in DMSO. Absorption spectra are normalized. Emission spectra were corrected for differences in absorption at the excitation wavelength. **1ec2** was excited at 425 nm wavelength, **1e** at 416 nm.

## Quantum Yield Determination for **1e** and **1ec2**

To quantify the difference in emission intensity, we determined the quantum yields of **1e** and **1ec2** in (aerated) phosphate buffered aqueous solution with pH 6.4 on the JASCO Spectrofluorometer FP-8600 equipped with a ILFC-847S integrating sphere, which was continuously purged with N<sub>2</sub> gas during measurements. The integrating sphere was calibrated using a calibrated halogen lamp (ESC-842) and multiple standards<sup>2</sup> gave accurate results: Rhodamine 6G 96% (Lit.: 94-95%), Ru(bpy)<sub>3</sub>Cl<sub>2</sub> 3% (Lit.: 2.8-4.0%), Os(bpy)<sub>3</sub>Cl<sub>2</sub> 0.4% (Lit.: 0.5%). An excitation wavelength of 410 nm was chosen, as both molecules absorb at this wavelength. Emission was measured in the range of 380 – 1010 nm. Excitation and emission bandwidths were set to 5 nm. The photomultiplier tube (PMT) voltage was set to 735 V, no beam attenuators or apertures were used. Three types of measurements were used for the calculation of the quantum yield:

1. Blank: The 0.5 cm cuvette with stopper was filled with phosphate buffered aqueous solution and the light reaching the detector was measured during direct irradiation of the solution.
2. Direct excitation: The 0.5 cm cuvette was filled with a solution of either **1e** or **1ec2** and directly irradiated by the excitation light, and the emission was recorded.
3. Indirect excitation: The solution used in the direct measurement was switched to the “out” position and the emission and absorbance from indirect excitation was measured, to correct for this contribution to the measured quantum yield.

Each measurement was performed at a scan rate of 100 nm/min and the average of three cycles was taken to decrease the noise level. The quantum yield was determined using the “Quantum Yield Calculation” software supplied with the instrument.

Due to the small amount of **1ec2** available, we were not able to perform the measurement at precise concentrations. However, different arbitrary concentrations were measured and no concentration dependency was observed for either chromophore. It is important to note that for this instrument, an optical density of at least 0.1 is necessary.

As visible in Figure S17 and S18, the signal-to-noise ratio decreases above 800 nm, which poses a significant problem for low emission intensities. Despite the slow measurements and averaging of three measurement cycles, we were not able to improve the spectra further. Due to this limitation, we integrated the emission only from 500 – 800 nm for **1e** and 500 – 850 nm for **1ec2**, consistently obtaining quantum yields below 1% for **1e** and 10.5 – 11.5% for **1ec2** in the aqueous buffered solution. No precise value for **1e** could be obtained given the poor signal-to-noise in the measurements.

The same measurements were performed in DMSO (Figure S19 and S20). The better signal-to-noise ratio allowed us to integrate in the area of 500 – 900 nm wavelength. The determined quantum yields for **1e** and **1ec2** were 19.0% ±0.9% and 58.5% ±1.5%, respectively.

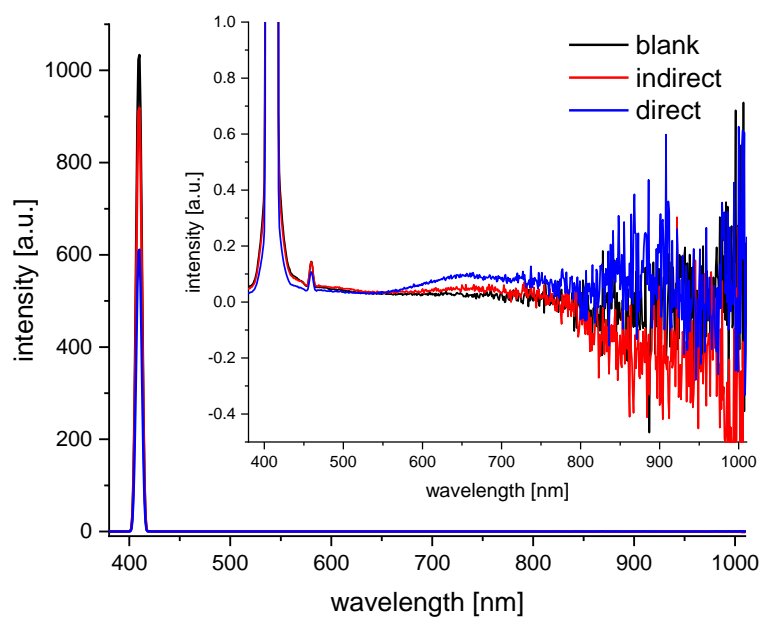

Figure S17: Exemplary spectral dataset used for the determination of the absolute quantum yield of **1e** in phosphate buffered aqueous solution at pH 6.4. Inset shows the spectrum with the y-axis scaled to the emission signal.

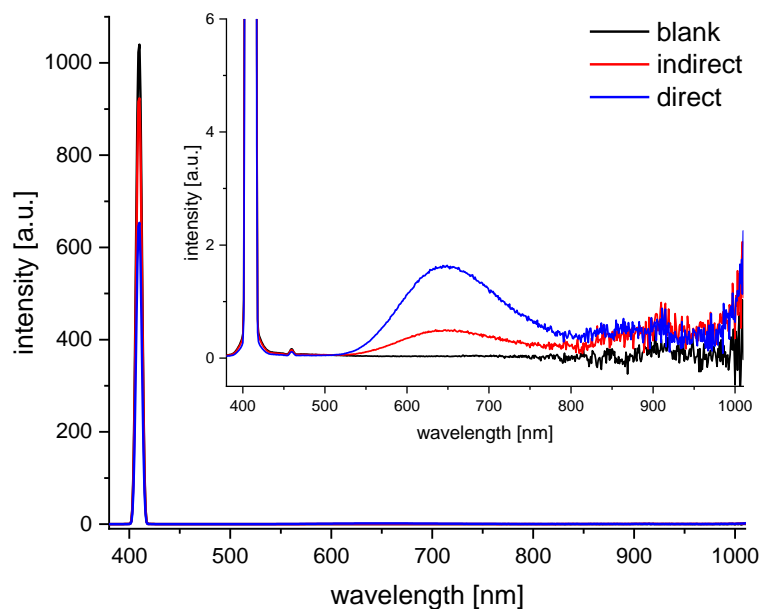

Figure S18: Exemplary spectral dataset used for the determination of the absolute quantum yield of **1ec2** in phosphate buffered aqueous solution at pH 6.4. Inset shows the spectrum with the y-axis scaled to the emission signal.

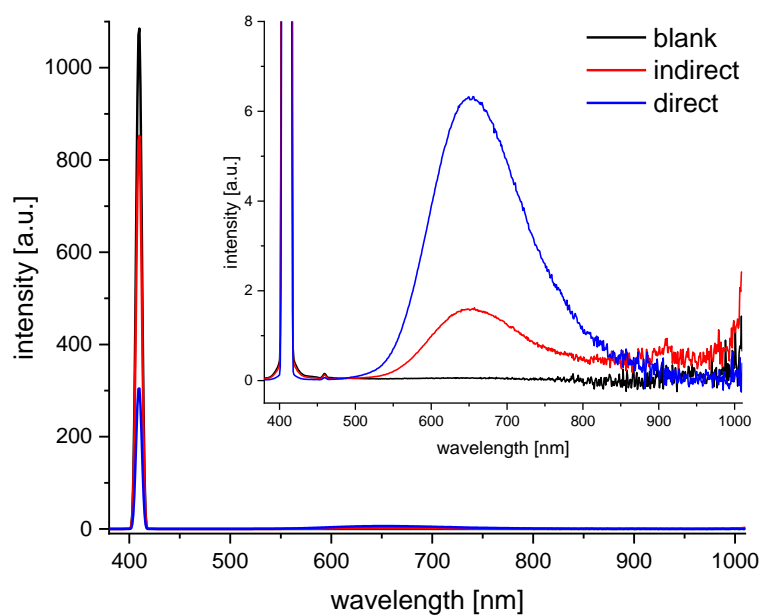

Figure S19: Exemplary spectral dataset used for the determination of the absolute quantum yield of **1e** in DMSO. Inset shows the spectrum with the y-axis scaled to the emission signal.

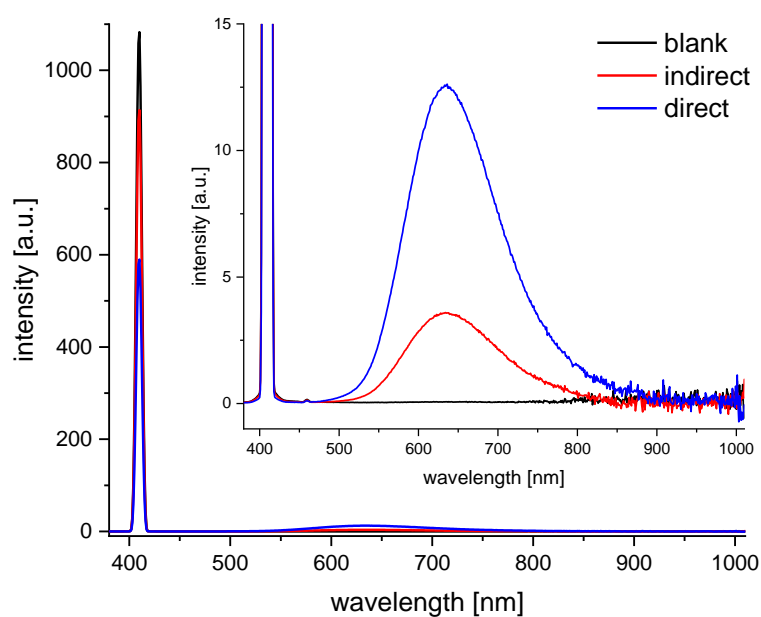

Figure S20: Exemplary spectral dataset used for the determination of the absolute quantum yield of **1ec2** in DMSO. Inset shows the spectrum with the y-axis scaled to the emission signal.

## Unedited Photographs of Solid-State Emission and Emission Spectra

For the emission measurements of compounds **3**, **1a**, **1f**, and **1e** in solid state, the solids were finely ground using a mortar and pestle, and the resulting fine powder was transferred onto a glass slide. A second glass slide was pressed on top and PTFE isolating band (chosen due to its white color and lack of luminescence) was wrapped around the top and bottom of the glass slides to hold the solids in place. Due to the lack of sufficient material, **1e****c****2** dissolved in methanol was dropcasted onto a glass slide and the resulting film was dried in vacuum overnight. The samples were fastened in the integrating sphere at a height ensuring direct irradiation of the solids with the excitation laser. All samples were excited at 400 nm wavelength.

Apart from the emission of **3**, all emission spectra show similar shape and maxima for the different chromophores in solid state. The influence of the macrocycle on the emission wavelength of **1e****c****2** appears to be negligible in solid state. The emission is hypsochromically shifted compared to the spectra measured in aqueous solution, which is to be expected due to the lack of solvatochromic effects.

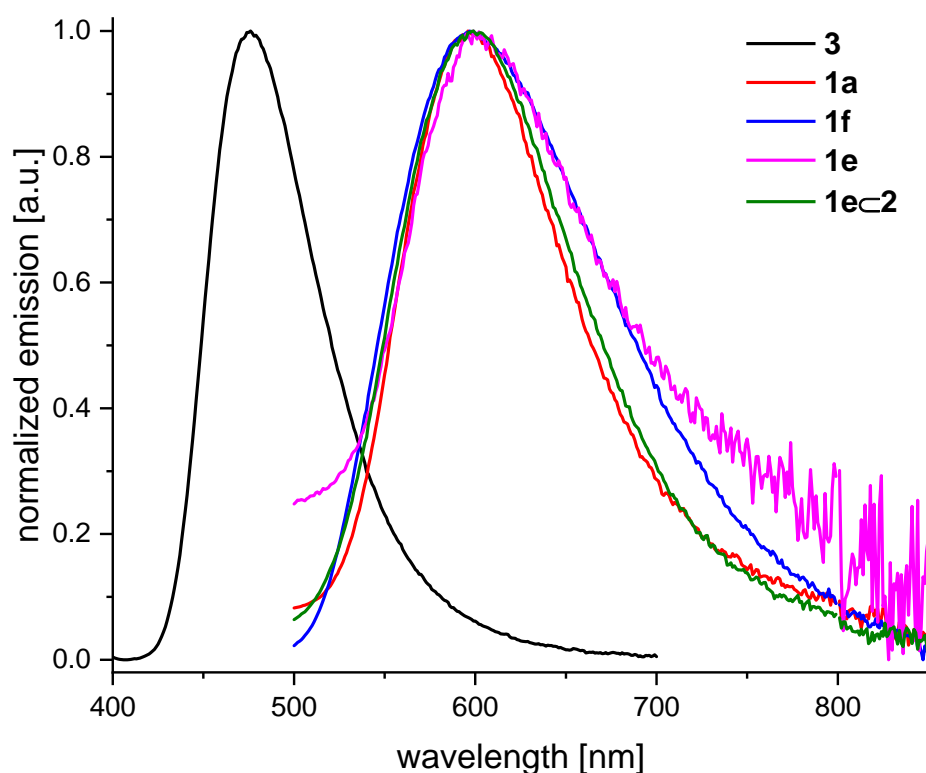

Figure S21: Normalized emission spectra of the powdered solids of **3**, **1a**, **1f**, and **1e**, and a film of **1e****c****2** irradiated at 400 nm wavelength. An artifact at 800 nm wavelength caused by the second harmonic oscillation was removed by deleting this measurement point in all spectra for better visibility.

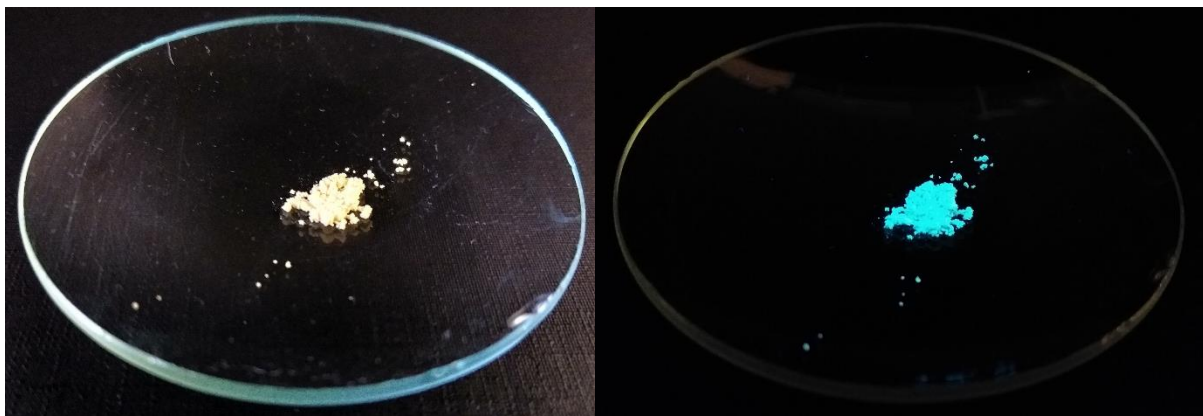

Figure S1: Solids of **3** under ambient light (left) and irradiated by a UV lamp with 366 nm light (right).

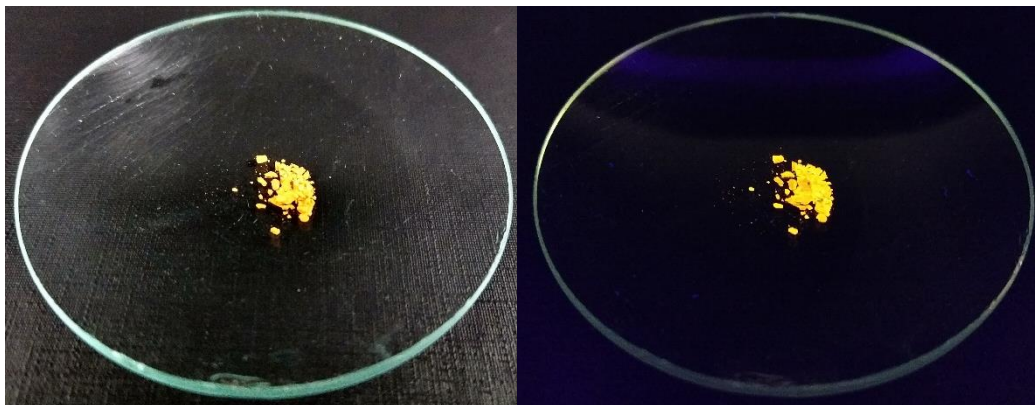

Figure S23: Solids of **1a** under ambient light (left) and irradiated by a UV lamp with 366 nm light (right).

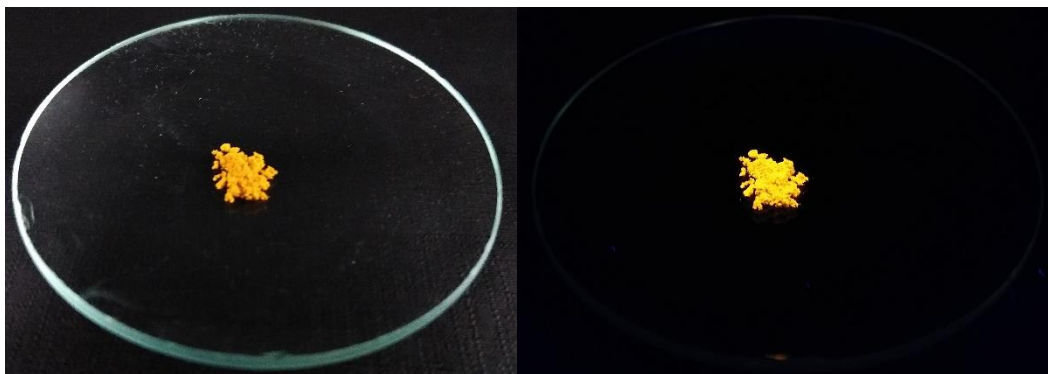

Figure S24: Solids of **1f** under ambient light (left) and irradiated by a UV lamp with 366 nm light (right).

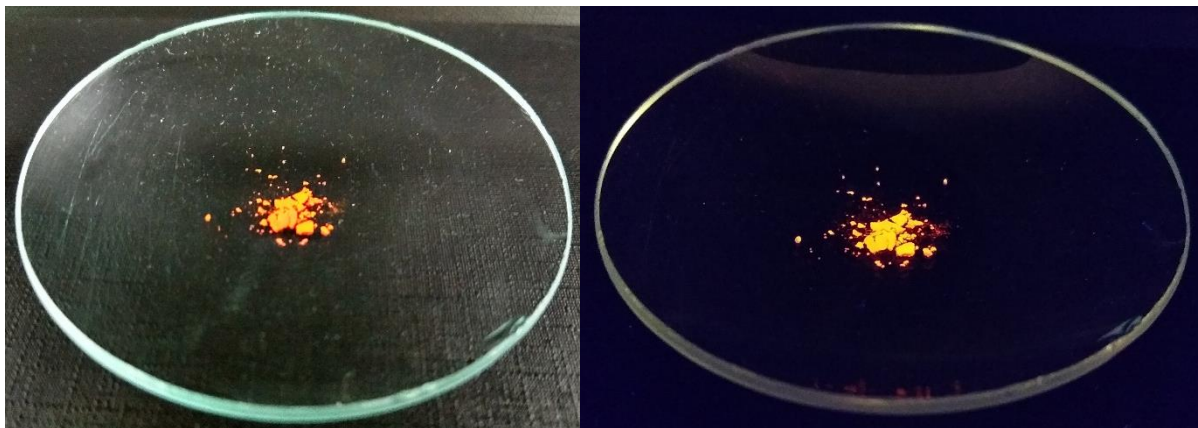

Figure S25: Solids of **1e** under ambient light (left) and irradiated by a UV lamp with 366 nm light (right).

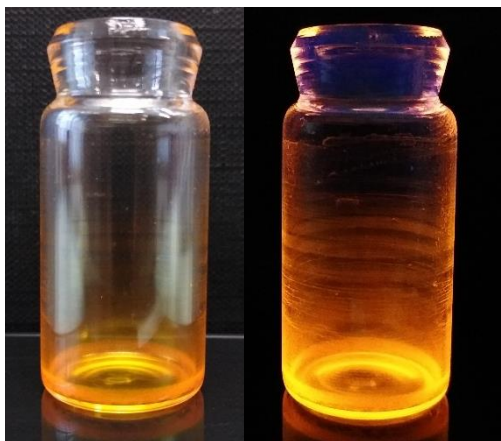

Figure S2: Film of **1ec2** under ambient light (left) and irradiated by a UV lamp with 366 nm light (right).

## Deslipping Experiments of **1ec2**

To determine whether the stopper moieties are sufficiently bulky and yielded a stable rotaxane, we performed experiments at elevated temperatures to see if “deslipping” occurs. The association of guests with **2** is mainly driven by the hydrophobic effect and severely diminished in the presence of dipolar aprotic solvents, therefore we chose acetonitrile and DMSO as solvents to guarantee deslipping – if it can occur. For the experiments a solution of **1ec2** in ACN or DMSO was heated to 75 °C or 120 °C in a closed vial, respectively. After certain time intervals the solution was injected into an HPLC-ESI-MS and checked for the presence of either **2** or **1e**, the deslipping products. However, comparison to the chromatograms of either molecule showed no signs of their formation after 16 h of heating (Figure S27).

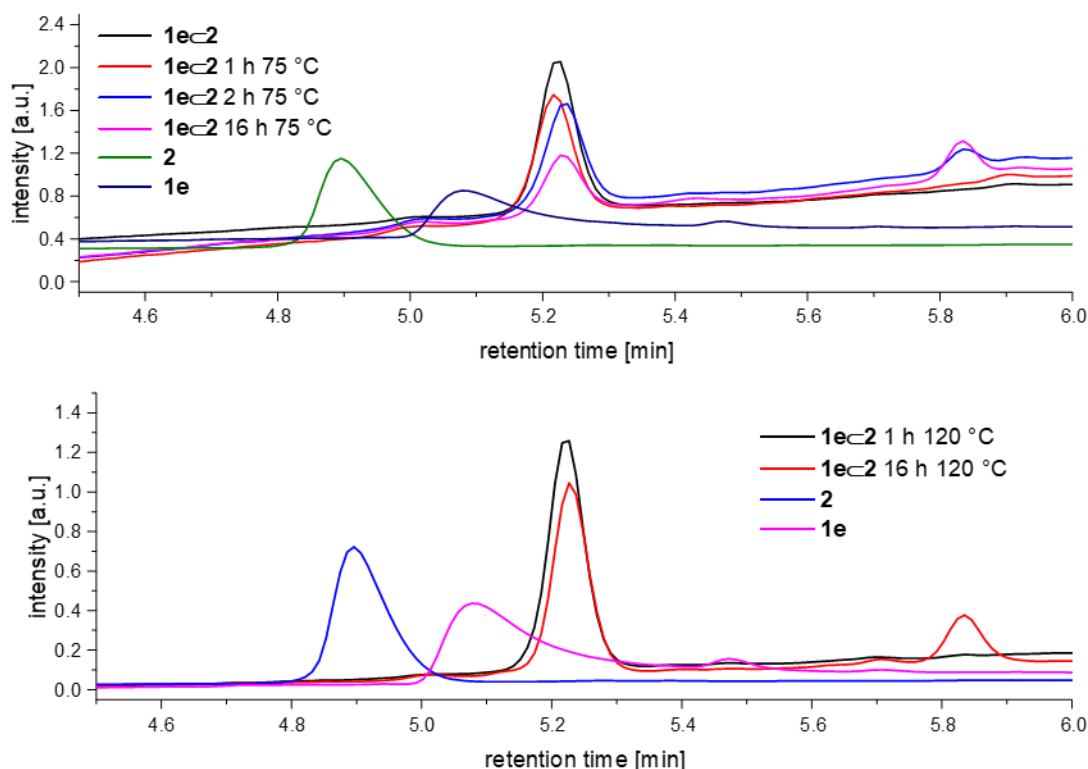

Figure S27: Qualitative HPLC-MS chromatograms (254 nm) of **1ec2** before and after heating to 75 °C in acetonitrile (top) and 120 °C in DMSO (bottom). Chromatograms of **1e** and **2** are shown as comparison. The plotted intensities were adjusted to compensate for different baseline drifts and are not quantitative. As confirmed by the absence of **1e** and **2** after prolonged heating, the isolated rotaxane **1ec2** does not show deslipping under these conditions.

## Reversibility of the Knoevenagel Condensation

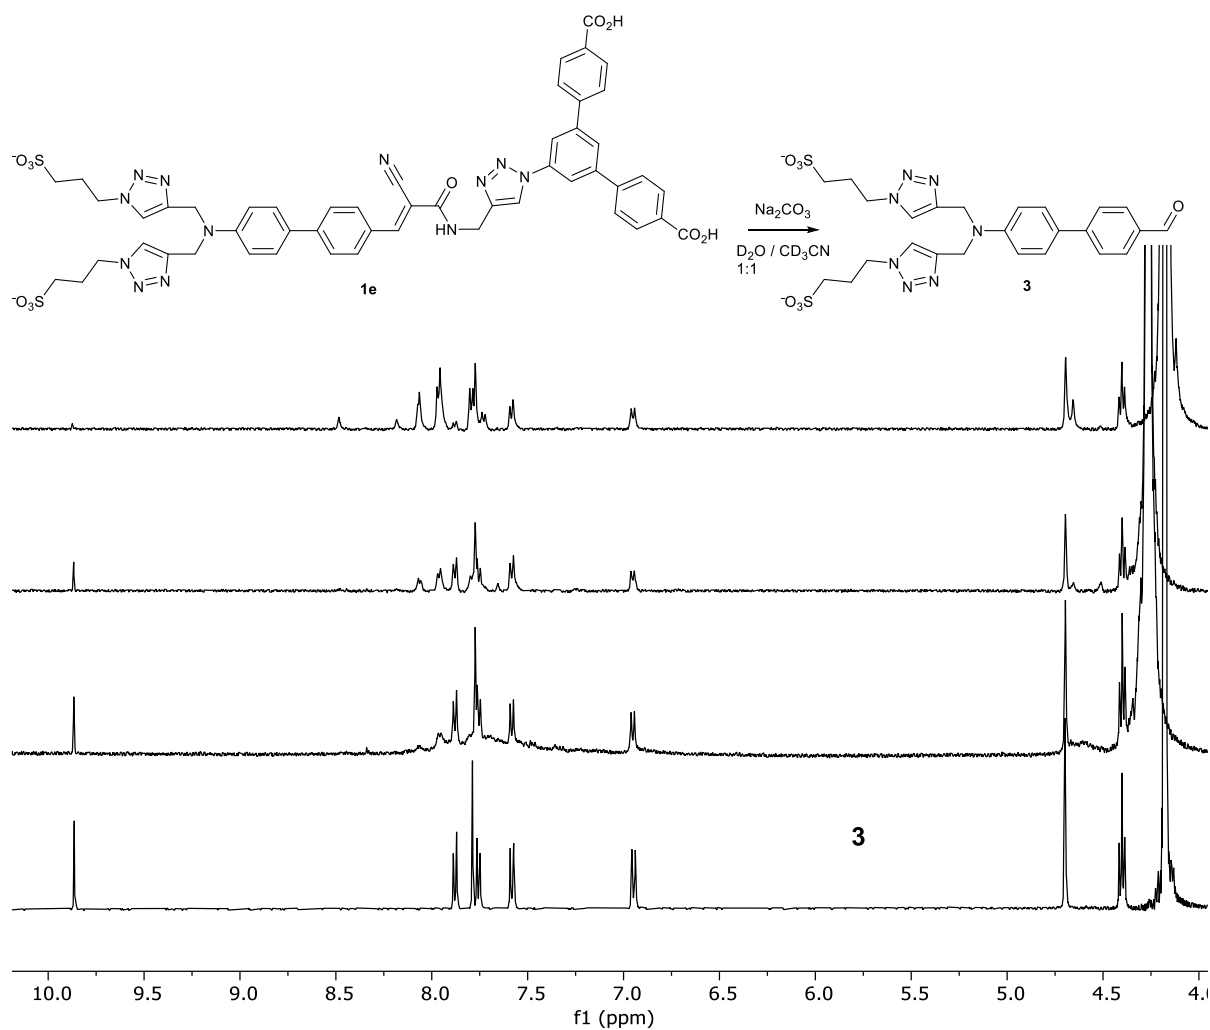

Scheme S3: Hydrolysis of **1e** to form **3** and various decomposition products of **e** in  $\text{D}_2\text{O} / \text{ACN-d}_3$  (1:1) in presence of base ( $\text{Na}_2\text{CO}_3$ ) over time.  $^1\text{H}$ -NMR spectra (500 MHz) show the reaction over time with the third measurement after 20 h and a comparison to the pure compound **3** (bottom).

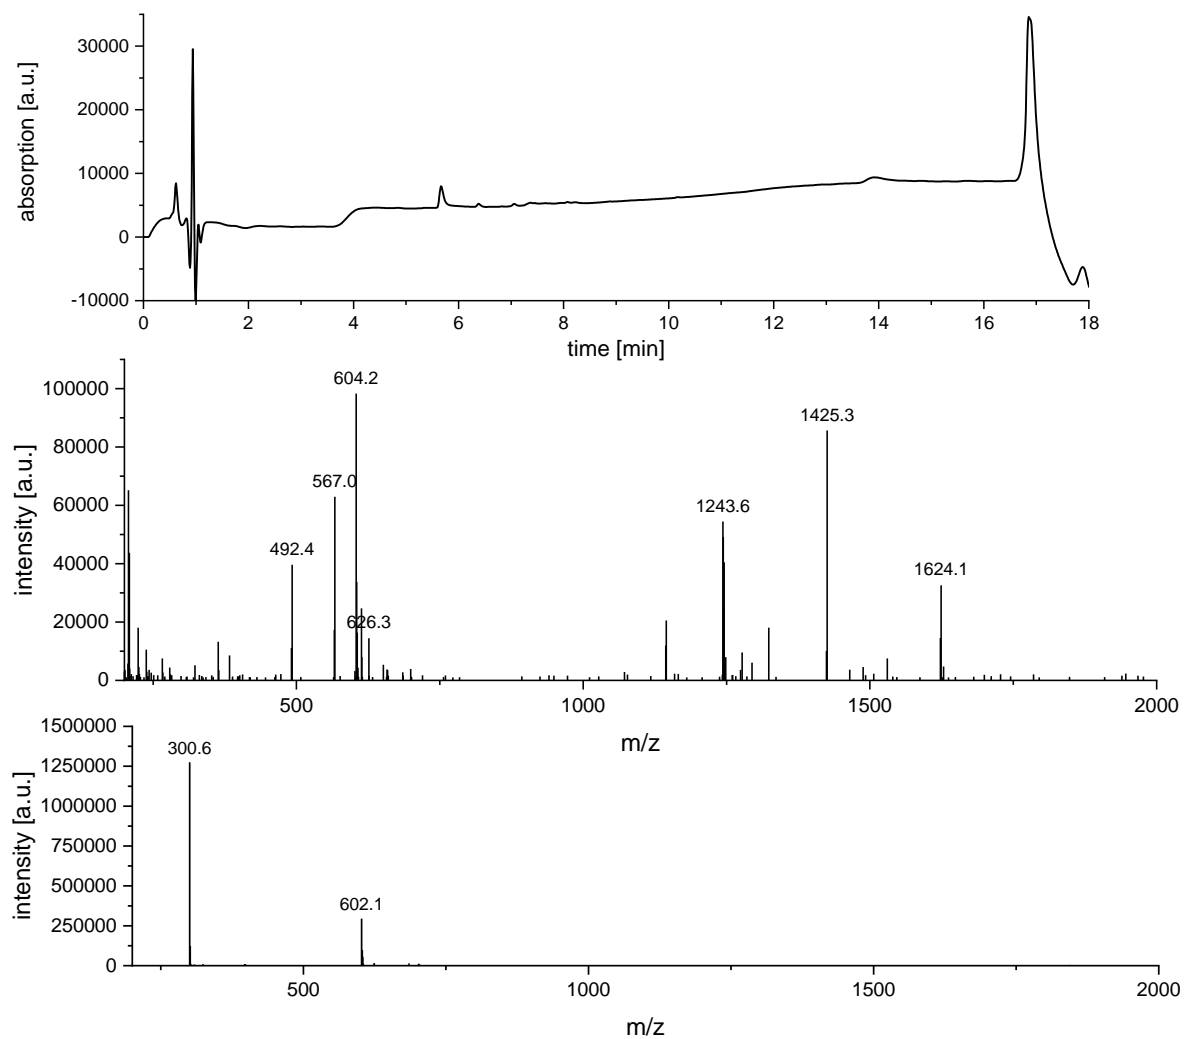

Figure S28: LC-ESI-MS UV-VIS chromatogram (200-800 nm, top) with peak of **3** visible at approx. 5.6 min retention time. Mass spectra of the peak in the positive (middle) and negative (bottom) mode, showing the m/z corresponding to **3** (604 m/z in the positive mode, 602 and 300 m/z in the negative mode).

## Supplementary Reaction Schemes

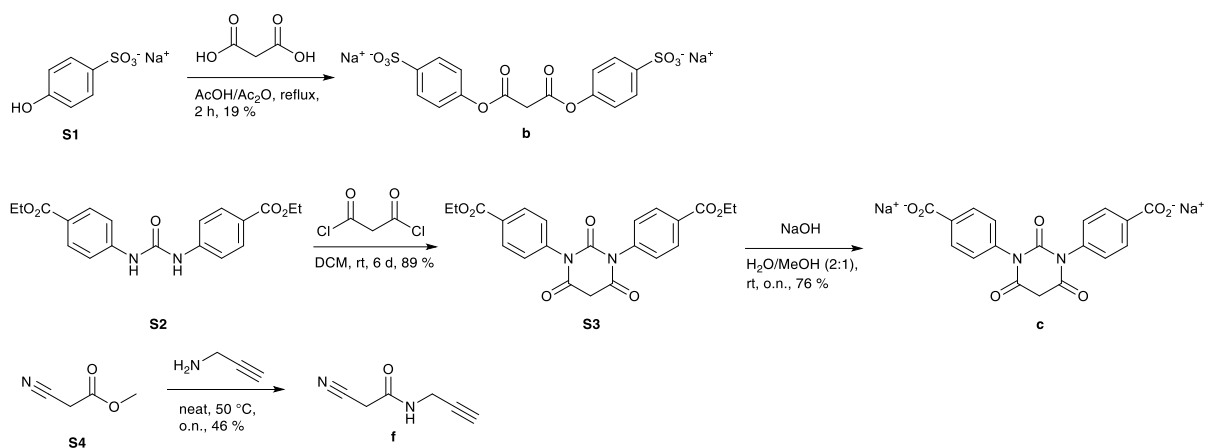Scheme S4: Synthesis of **b**, **c**, and **f**.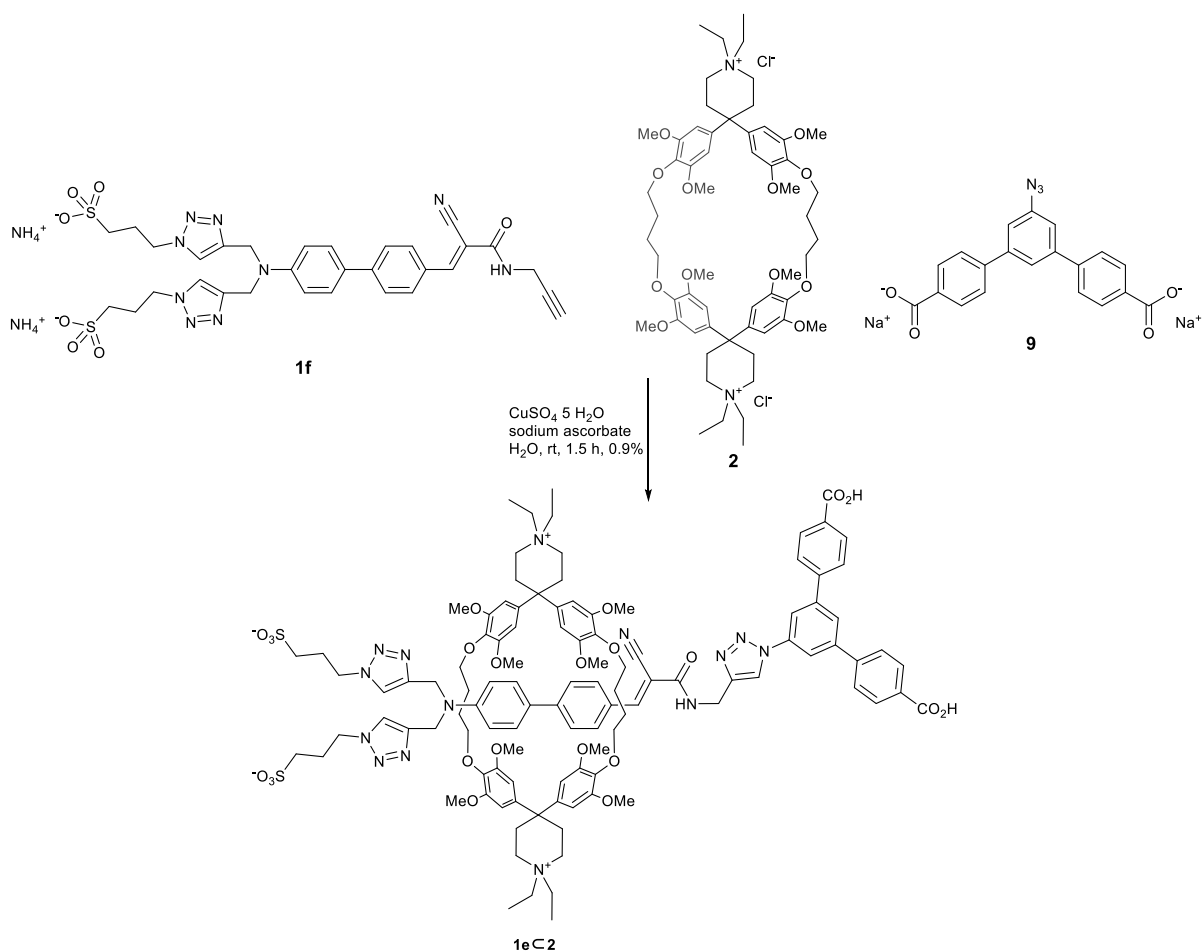

Scheme S5: Assembly of the [2]rotaxane **1ec2** in water via CuAAC.

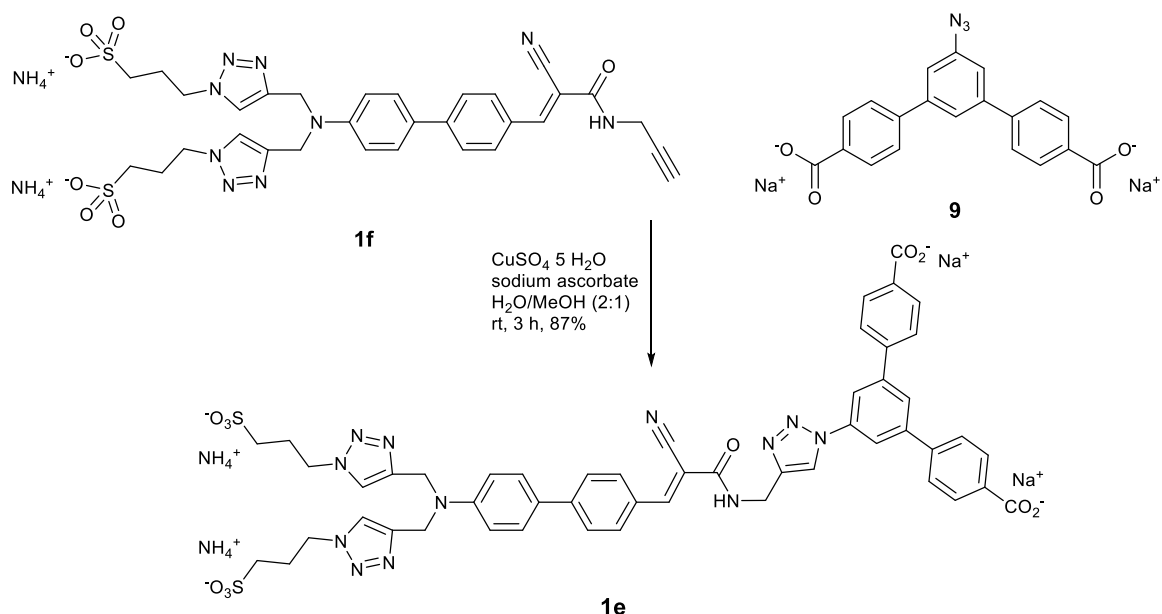

Scheme S6: Synthesis of reference compound **1e** via CuAAC.

## Experimental Procedures

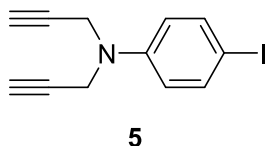

4-Iodoaniline (**4**, 10.2 g, 46.6 mmol, 1.0 equiv.),  $\text{K}_2\text{CO}_3$  (32.2 g, 233 mmol, 5.0 equiv.) and a solution of propargyl bromide in toluene (80 %, 12 mL, 111 mmol, 2.4 equiv.) were suspended in acetonitrile (160 mL) and the resulting mixture was heated to 60 °C for 3 d. The mixture was allowed to cool to room temperature, insoluble salts were filtered off and the solvent was evaporated. The crude product was purified by flash chromatography (cyclohexane to 40% DCM) and the product was obtained as a yellow liquid (**5**, 9.05 g, 66 %).

$^1\text{H}$ -NMR (400 MHz,  $\text{CDCl}_3$ )  $\delta$  = 7.57 – 7.52 (m, 2H), 6.74 – 6.69 (m, 2H), 4.09 (d,  $J$  = 2.4, 4H), 2.25 (t,  $J$  = 2.3, 2H).

$^{13}\text{C}$ -NMR (126 MHz,  $\text{CDCl}_3$ )  $\delta$  = 147.32, 137.94, 117.71, 81.77, 78.83, 73.09, 40.51.

HR-ESI-MS ( $m/z$ ): meas. 295.9936 [ $\text{M}+\text{H}$ ] $^+$ , calc. 295.9931 ( $\text{C}_{12}\text{H}_{11}\text{IN}$ ) $^+$ .

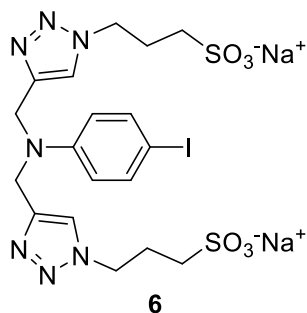

Sodium azide (2.01 g, 30.9 mmol, 4.0 equiv.) was dissolved in  $\text{H}_2\text{O}$  (5 mL), DMF (10 mL) and 1,3-propanesultone (2.7 mL, 30.9 mmol, 4.0 equiv.) was added. After 1 h at rt, TBTA (205 mg, 387  $\mu\text{mol}$ , 0.05 equiv.),  $\text{Cu}(\text{CH}_3\text{CN})_4\text{PF}_6$  (144 mg, 387  $\mu\text{mol}$ , 0.05 equiv.) and sodium ascorbate (78 mg, 387  $\mu\text{mol}$ ,

0.05 equiv.) were added, followed by a solution of **5** (2.28 g, 7.73 mmol, 1.0 equiv.) in DMF (5 mL). Additional H<sub>2</sub>O (5 mL) and DMF (5 mL) were added and the mixture was stirred at room temperature for 22 h. To destroy remaining azide the reaction mixture was quenched with a few drops of an aqueous Na<sub>2</sub>S<sub>2</sub>O<sub>3</sub> solution (5%) and a 2:1 I<sub>2</sub>/NaI mixture in EtOH (15w%) which was added until the solution assumed a brown color. Subsequently, the Na<sub>2</sub>S<sub>2</sub>O<sub>3</sub> solution was added to quench excess I<sub>2</sub>, observed by decolorization of the reaction mixture. The reaction mixture was washed with DCM 3x and the aqueous layer was concentrated. The crude product was purified by reverse phase column chromatography (C-18, H<sub>2</sub>O/ACN 8:2), after which the product was present in a mixture with 3-hydroxypropane-1-sulfonate. The solids were dissolved in a minimal amount of water and the product precipitated by addition of EtOH. After centrifugation and drying under vacuum, the product was obtained as a colorless solid (**6**, 2.33 g, 45 %).

<sup>1</sup>H-NMR (400 MHz, D<sub>2</sub>O)  $\delta$  = 7.74 (s, 2H), 7.33 (d,  $J$  = 8.3, 2H), 6.61 (d,  $J$  = 8.5, 2H), 4.60 (s, 4H), 4.43 (t,  $J$  = 7.0, 4H), 2.87 – 2.78 (m, 4H), 2.31 – 2.21 (m, 4H).

<sup>13</sup>C-NMR (101 MHz, D<sub>2</sub>O)  $\delta$  = 147.17, 144.78, 137.84, 124.02, 116.49, 79.18, 48.77, 47.69, 45.91, 25.22.

HR-ESI-MS (m/z): meas. 311.5068 [M]<sup>2-</sup>, calc. 311.5064 (C<sub>18</sub>H<sub>22</sub>IN<sub>7</sub>O<sub>6</sub>S<sub>2</sub>)<sup>2-</sup>; meas. 646.0031 [M+Na]<sup>-</sup>, calc. 646.0021 (C<sub>18</sub>H<sub>22</sub>IN<sub>7</sub>NaO<sub>6</sub>S<sub>2</sub>)<sup>-</sup>.

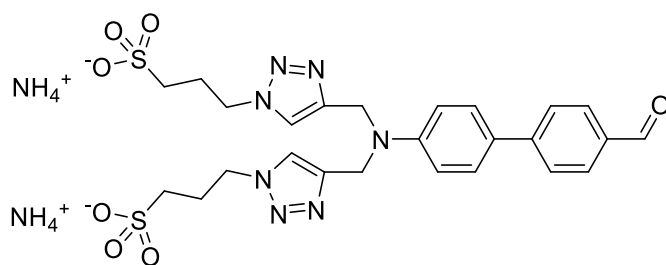

**3**

**6** (4.00 g, 5.98 mmol, 1.0 equiv.), 4-formylphenylboronic acid (1.35 g, 8.97 mmol, 1.5 equiv.), and K<sub>3</sub>PO<sub>4</sub> (2.66 g, 12.6 mmol, 2.1 equiv.) in H<sub>2</sub>O (200 mL) was degassed for 25 min and Pd(OAc)<sub>2</sub> (67 mg, 299  $\mu$ mol, 0.05 equiv.) was added. The mixture was heated to reflux for 1 h, then cooled to room temperature and concentrated. The residue was suspended in EtOH, sonicated and filtered. The solids were redissolved in water and adsorbed on Celite 545, then purified by reverse-phase column chromatography (C-18, H<sub>2</sub>O/MeOH 9:1 to 8:2, 20 mM NH<sub>4</sub>OAc) to give the product as a bright yellow solid (**3**, 2.96 g, 78 %).

<sup>1</sup>H-NMR (400 MHz, D<sub>2</sub>O)  $\delta$  = 9.92 (s, 1H), 7.99 (d,  $J$  = 8.2, 2H), 7.87 – 7.83 (m, 4H), 7.71 (d,  $J$  = 8.7, 2H), 7.07 (d,  $J$  = 8.7, 2H), 4.52 (t,  $J$  = 6.9, 4H), 2.84 – 2.79 (m, 4H), 2.34 – 2.25 (m, 4H).

<sup>13</sup>C-NMR (101 MHz, D<sub>2</sub>O)  $\delta$  = 194.85, 147.85, 145.92, 144.69, 133.11, 130.52, 127.94, 126.91, 125.44, 123.80, 113.49, 48.64, 47.62, 45.30, 25.16.

HR-ESI-MS (m/z): meas. 670.1097 [M+3Na]<sup>+</sup>, calc. 670.1101 (C<sub>25</sub>H<sub>27</sub>N<sub>7</sub>Na<sub>3</sub>O<sub>7</sub>S<sub>2</sub>)<sup>+</sup>.

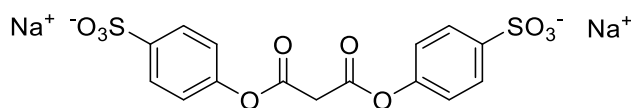

**b**

Sodium 4-hydroxybenzenesulfonate dihydrate (2.00 g, 8.62 mmol, 2.0 equiv.) and malonic acid (451 mg, 4.33 mmol, 1.0 equiv.) were suspended in a mixture of AcOH (4.2 mL) and Ac<sub>2</sub>O (20.3 mL). The suspension was degassed with argon for 10 min and heated to reflux for 2 h. After allowing it to cool down to room temperature, the formed precipitate was filtered off, washed with Ac<sub>2</sub>O and Et<sub>2</sub>O. The resulting solids were suspended in methanol (roughly 150 mL) and water was added until the solids

dissolved. Upon cooling, the precipitated product was filtered off and washed with methanol. After drying in vacuum, the product was obtained as a pale yellow powder (384 mg, 19%).

$^1\text{H-NMR}$  (400 MHz, DMSO- $d_6$ )  $\delta$  = 7.68 – 7.63 (m, 4H), 7.16 – 7.11 (m, 4H), 4.12 (s, 2H).

$^{13}\text{C-NMR}$  (101 MHz, DMSO- $d_6$ )  $\delta$  = 165.19, 150.03, 146.31, 127.07, 120.87, 41.04.

HR-ESI-MS ( $m/z$ ): meas. 206.9867 [ $\text{M}-2\text{Na}$ ] $^{2-}$ , calc. 206.9863 ( $\text{C}_{15}\text{H}_{10}\text{O}_{10}\text{S}_2$ ) $^{2-}$ .

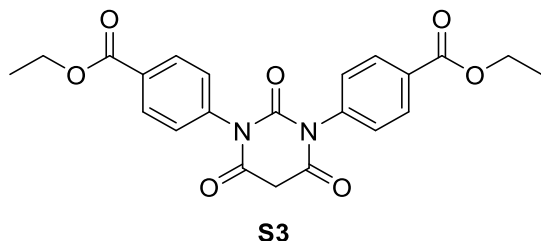

**S2** (prepared according to literature<sup>3</sup>; 356 mg, 1.00 mmol, 1.00 equiv.) and malonyl dichloride (0.1 mL, 1.03 mmol, 1.03 equiv.) were dissolved in dry DCM (40 mL) and stirred at room temperature for 4 d. No further conversion was observed by LC-MS. Additional malonyl dichloride (0.1 mL, 1.03 mmol, 1.03 equiv.) was added and the reaction stirred for 2 d at room temperature. The reaction mixture was treated with aqueous 1 M HCl solution and extracted with EtOAc. The crude product was purified by column chromatography (cyclohexane/ethyl acetate) to give the product (**S3**, 378 mg, 89 %) as a white solid.

$^1\text{H-NMR}$  (500 MHz, DMSO- $d_6$ )  $\delta$  = 8.09 – 8.04 (m, 4H), 7.49 – 7.44 (m, 4H), 4.33 (q,  $J$  = 7.1, 4H), 4.06 (s, 2H), 1.33 (t,  $J$  = 7.1, 6H).

$^{13}\text{C-NMR}$  (126 MHz, DMSO- $d_6$ )  $\delta$  = 165.72, 165.25, 151.28, 139.47, 130.11, 129.90, 129.46, 61.06, 47.74 (splitting caused by partial H/D exchange on the active methylene position), 41.15, 14.20.

HR-ESI-MS ( $m/z$ ): meas. 447.1161 [ $\text{M}+\text{Na}$ ] $^+$ , calc. 447.1163 ( $\text{C}_{22}\text{H}_{20}\text{N}_2\text{NaO}_7$ ) $^+$ .

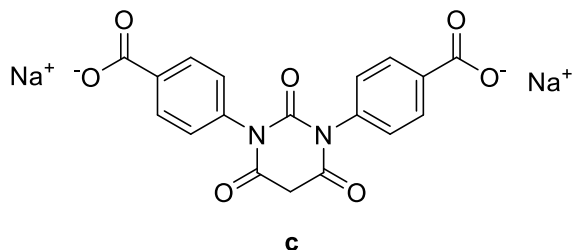

To a degassed solution of NaOH (188 mg, 4.71 mmol, 10.0 equiv.) in  $\text{H}_2\text{O}/\text{MeOH}$  (2:1, 12 mL) was added **S3** (200 mg, 471  $\mu\text{mol}$ , 1.0 equiv.) and the mixture was stirred at room temperature over night. The mixture was concentrated and the resulting solids redissolved in a minimal amount of water. A white solid precipitated upon addition of a mixture of EtOH/*i*PrOH and after centrifugation, the solids were suspended in EtOH and sonicated to remove excess NaOH. After centrifugation and drying on high vacuum, the product was obtained as a pure white powder (**c**, 148 mg, 76%).

$^1\text{H-NMR}$  (500 MHz,  $\text{D}_2\text{O}$ )  $\delta$  = 8.03 – 7.99 (m, 4H), 7.44 – 7.40 (m, 4H), 5.02 (s, 0H). Integral of the  $\text{CH}_2$  group is inaccurate due to rapid H/D exchange.

$^{13}\text{C-NMR}$  (126 MHz,  $\text{D}_2\text{O}$ )  $\delta$  175.01, 166.64, 154.13, 137.83, 137.00, 130.07, 128.65, 78.80.

HR-ESI-MS ( $m/z$ ): meas. 413.0353 [ $\text{M}+\text{H}$ ] $^+$ , calc. 413.0356 ( $\text{C}_{18}\text{H}_{11}\text{N}_2\text{Na}_2\text{O}_7$ ) $^+$ .

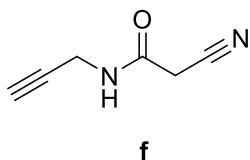

A neat mixture of methyl cyanoacetate (0.58 mL, 650 mg, 6.36 mmol, 1.00 equiv.) and propargylamine (0.42 mL, 363 mg, 6.53 mmol, 1.03 equiv.) was heated to 50 °C over night in a sealed reaction flask. The mixture changed color to deep red within a few minutes. The reaction mixture was allowed to cool to room temperature, the precipitate was collected by filtration and washed thoroughly with DCM. The product<sup>4</sup> was dried in vacuum and obtained as a pink solid which turned light brown over time (**f**, 370 mg, 46%).

<sup>1</sup>H-NMR (500 MHz, DMSO-d<sub>6</sub>)  $\delta$  = 8.69 (br s, 1H), 3.89 (dd,  $J$  = 5.4, 2.5, 2H), 3.66 (s, 2H), 3.17 (t,  $J$  = 2.5, 1H).

<sup>1</sup>H-NMR (500 MHz, CDCl<sub>3</sub>)  $\delta$  = 6.27 (s, 1H), 4.11 (dd,  $J$  = 5.3, 2.6, 2H), 3.41 (s, 2H), 2.31 (t,  $J$  = 2.6, 1H).

<sup>13</sup>C-NMR (126 MHz, DMSO-d<sub>6</sub>)  $\delta$  = 162.04, 115.93, 80.29, 73.58, 28.45, 25.13.

HR-ESI-MS ( $m/z$ ): meas. 145.0371 [ $M+Na$ ]<sup>+</sup>, calc. 145.0371 (C<sub>6</sub>H<sub>6</sub>N<sub>2</sub>NaO)<sup>+</sup>.

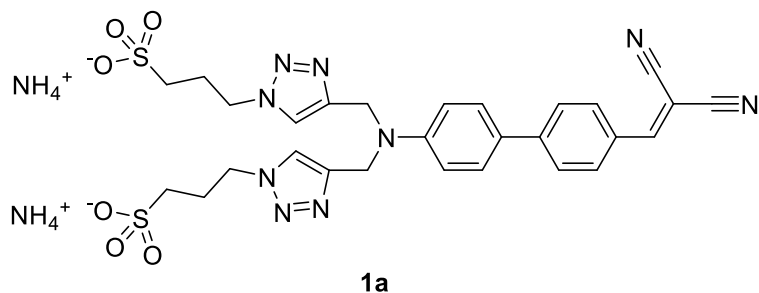

**3** (35 mg, 54.9  $\mu$ mol, 1.0 equiv.) and malononitrile (7.0 mg, 10.5  $\mu$ mol, 1.9 equiv.) were dissolved in H<sub>2</sub>O (1 mL) and a color change from yellow to red was observed within the first few minutes. The reaction mixture was stirred at room temperature for 3 h, ACN was added to precipitate the product as an orange solid. After centrifugation, the solids were dried in high vacuum to give the product as a pale orange solid (**1a**, 26 mg, 69%).

<sup>1</sup>H-NMR (500 MHz, D<sub>2</sub>O)  $\delta$  = 7.67 (s, 2H), 7.48 (s, 1H), 7.37 (d,  $J$  = 8.2 Hz, 2H), 7.23 (d,  $J$  = 8.4 Hz, 2H), 7.14 (d,  $J$  = 8.2 Hz, 2H), 6.76 (d,  $J$  = 8.5 Hz, 2H), 4.58 (s, 4H), 4.29 (t,  $J$  = 7.0 Hz, 4H), 2.72 – 2.65 (m, 4H), 2.17 – 2.07 (m, 4H).

<sup>13</sup>C-NMR (126 MHz, D<sub>2</sub>O)  $\delta$  = 161.26, 149.28, 146.21, 145.75, 132.51, 129.24, 128.90, 127.01, 126.19, 124.90, 115.60, 114.62, 114.38, 78.72, 49.73, 48.69, 46.41, 26.22. (A drop of MeOD was added as a reference.)

HR-ESI-MS ( $m/z$ ): meas. 324.5765 [ $M-2(NH_4)$ ]<sup>2-</sup>, calc. 324.5768 (C<sub>28</sub>H<sub>27</sub>N<sub>9</sub>O<sub>6</sub>S<sub>2</sub>)<sup>2-</sup>.

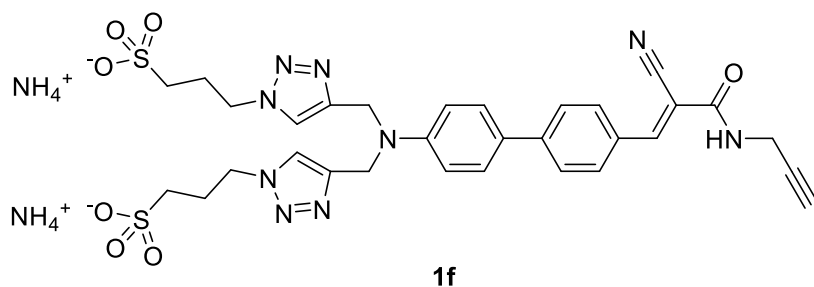

**3** (150 mg, 235  $\mu\text{mol}$ , 1.00 equiv.) and **f** (34.4 mg, 282  $\mu\text{mol}$ , 1.20 equiv.) were dissolved in anhydrous DMF (10 mL), degassed for 20 min and heated to 80 °C for 24 h under inert atmosphere, after which time **3** could still be observed in LC-MS. The reaction mixture was cooled to room temperature, additional **f** (11.5 mg, 94  $\mu\text{mol}$ , 0.40 equiv.) was added and heating was resumed for 18 h. The red solution was cooled to room temperature and TBME was added to precipitate the product. After centrifugation, the orange solids were dissolved in 100 mM aqueous  $\text{NH}_4\text{OAc}$  solution to displace dimethylammonium counterions partially present in the product. The solution was concentrated, the solids suspended in EtOH and sonicated to wash out excess salts. After drying on high vacuum, the pure *E* isomer of the product was obtained as an orange solid (**1f**, 63 mg, 36%).

$^1\text{H-NMR}$  (500 MHz,  $\text{D}_2\text{O}/\text{CD}_3\text{CN}$  (9:1))  $\delta$  = 8.44 (s, 1H), 8.23 (d,  $J$  = 8.2 Hz, 2H), 8.14 (s, 2H), 8.02 (d,  $J$  = 8.2 Hz, 2H), 7.90 (d,  $J$  = 8.5 Hz, 2H), 7.27 (d,  $J$  = 8.5 Hz, 2H), 5.05 (s, 4H), 4.77 – 4.73 (m, 5H (overlap with  $\text{D}_2\text{O}$ )), 4.33 (d,  $J$  = 2.6 Hz, 2H), 3.09 – 3.04 (m, 4H), 2.93 (t,  $J$  = 2.5 Hz, 1H), 2.57 – 2.50 (m, 4H).

$^1\text{H-NMR}$  (500 MHz,  $\text{DMSO-d}_6$ )  $\delta$  8.89 (t,  $J$  = 5.5 Hz, 1H), 8.16 (s, 1H), 8.01 (s, 2H), 8.00 – 7.96 (m, 2H), 7.84 – 7.79 (m, 2H), 7.65 – 7.61 (m, 2H), 7.11 (br s, 2H), 7.01 (d,  $J$  = 8.9 Hz, 2H), 4.71 (s, 4H), 4.43 (t,  $J$  = 7.1 Hz, 4H), 4.00 (dd,  $J$  = 5.5, 2.5 Hz, 2H), 3.16 (t,  $J$  = 2.5 Hz, 1H), 2.40 (dd,  $J$  = 8.3, 6.5 Hz, 4H), 2.11 – 2.04 (m, 4H).

$^{13}\text{C-NMR}$  (126 MHz,  $\text{D}_2\text{O}/\text{CD}_3\text{CN}$  (9:1))  $\delta$  = 163.59, 153.64, 148.89, 145.95, 145.65, 132.40, 130.19, 128.82, 128.30, 126.97, 124.75, 117.43, 114.75, 103.34, 80.27, 72.82, 49.73, 48.59, 46.84, 30.31, 26.25.

HR-ESI-MS ( $m/z$ ): meas. 774.1473 [ $\text{M}-2(\text{NH}_4)+3\text{Na}$ ] $^+$ , calc. 774.1475 ( $\text{C}_{31}\text{H}_{31}\text{N}_9\text{Na}_3\text{O}_7\text{S}_2$ ) $^+$ .

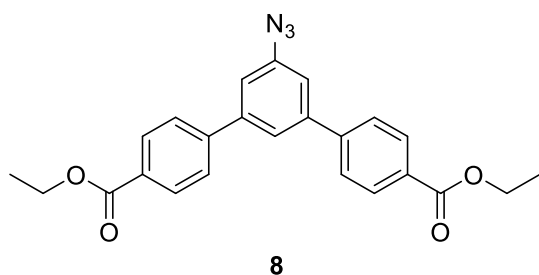

Aniline **7** (prepared according to literature<sup>5</sup>; 600 mg, 1.54 mmol, 1.0 equiv.) was dissolved in DMF (30 mL) and cooled to 0 °C. *tert*-Butyl nitrite (0.92 mL, 7.7 mmol, 5.0 equiv.) and trimethylsilylazide (1.00 mL, 7.7 mmol, 5.0 equiv.) were added, upon which the solution turned orange. The ice bath was removed and the reaction mixture was stirred at room temperature for 6 h, then poured onto water (~400 mL) to precipitate the product. The product was filtered off and washed with water to give a white-beige solid (**8**, 627 mg, 98%). The product contained a minor impurity visible in the  $^1\text{H-NMR}$  spectrum at 4.8 ppm and was used as is for the next step. An analytically pure sample was obtained by flash chromatography (cyclohexane/EtOAc 9:1 to 8:2).

$^1\text{H-NMR}$  (500 MHz,  $\text{CDCl}_3$ )  $\delta$  = 8.16 – 8.12 (m, 4H), 7.70 – 7.67 (m, 4H), 7.60 (t,  $J$  = 1.6, 1H), 7.27 (d,  $J$  = 1.6, 2H), 4.42 (q,  $J$  = 7.1, 4H), 1.43 (t,  $J$  = 7.1, 6H).

$^{13}\text{C}$ -NMR (126 MHz,  $\text{CDCl}_3$ )  $\delta$  = 166.44, 144.32, 142.78, 141.57, 130.38, 130.24, 127.30, 123.19, 117.53, 61.27, 14.51.

HR-ESI-MS ( $m/z$ ): meas. 416.1604  $[\text{M}+\text{H}]^+$ , calc. 416.1605 ( $\text{C}_{24}\text{H}_{22}\text{N}_3\text{O}_4$ ) $^+$ .

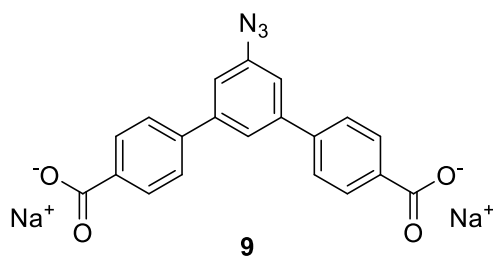

**8** (300 mg, 0.72 mmol, 1.0 equiv.) was suspended in a solution of NaOH (289 mg, 7.22 mmol, 10.0 equiv.) in THF/MeOH/ $\text{H}_2\text{O}$  (4:4:1, 13.5 mL) and heated to 50 °C for 1 h, during which time **8** dissolved. The reaction mixture was allowed to cool to room temperature, the formed precipitate was transferred to a centrifuge tube, and the flask rinsed with THF. After centrifugation, the beige solids were suspended in EtOH and subjected to centrifugation again to remove excess NaOH. The product was obtained as a slightly creamy-white solid after drying in high vacuum (**9**, 280 mg, 96%).

$^1\text{H}$ -NMR (500 MHz,  $\text{D}_2\text{O}$ )  $\delta$  = 7.91 (d,  $J$  = 8.0 Hz, 4H), 7.59 (d,  $J$  = 8.1 Hz, 4H), 7.49 (s, 1H), 7.13 (s, 2H).

$^{13}\text{C}$ -NMR (126 MHz,  $\text{D}_2\text{O}$ )  $\delta$  = 176.12, 142.73, 142.64, 141.76, 136.58, 130.40, 127.61, 123.12, 117.48. (A drop of MeOD was added as a reference)

HR-ESI-MS ( $m/z$ ): meas. 358.0853  $[\text{M}-2\text{Na}+1\text{H}]^-$ , calc. 358.0833 ( $\text{C}_{20}\text{H}_{12}\text{N}_3\text{O}_4$ ) $^+$ .

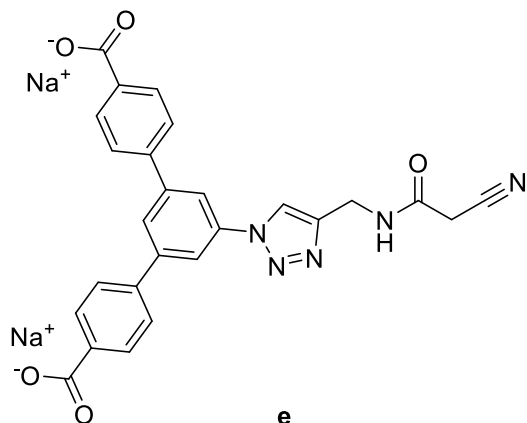

**f** (15 mg, 123  $\mu\text{mol}$ , 1.24 equiv.) and **9** (40 mg, 99  $\mu\text{mol}$ , 1.00 equiv.) were dissolved in  $\text{H}_2\text{O}$ /MeOH (1.5 mL, 2:1) and  $\text{CuSO}_4 \cdot 5 \text{H}_2\text{O}$  (2.5 mg, 9.9  $\mu\text{mol}$ , 0.10 equiv.) and sodium ascorbate (2.6 mg, 12.9  $\mu\text{mol}$ , 0.13 equiv.) were added under argon. The reaction mixture was stirred for 1 h and the product was precipitated as a white solid by addition of ACN. After centrifugation and drying in vacuum, the product was obtained as a white solid (**e**, 34 mg, 65%).

$^1\text{H}$ -NMR (500 MHz,  $\text{D}_2\text{O}$ )  $\delta$  = 7.50 – 7.38 (m, 5H), 6.83 – 6.74 (m, 7H), 4.08 (s, 2H), 3.33 (s, 0H). Contains ACN as an impurity. Active methylene group visible with wrong integral due to H/D exchange in  $\text{D}_2\text{O}$ .

$^1\text{H}$ -NMR (500 MHz,  $\text{D}_2\text{O}$ )  $\delta$  = 7.52 – 7.34 (m, 5H), 6.88 – 6.71 (m, 7H), 4.07 (s, 2H). After complete removal of solvent residues, the peaks are broadened and the active methylene group is not visible due to H/D exchange.

$^{13}\text{C}$ -NMR (126 MHz,  $\text{D}_2\text{O}$ )  $\delta$  = 174.40, 164.54, 143.83, 140.10, 139.50, 135.76, 135.22, 129.08, 125.50, 123.86, 120.66, 115.90, 115.55, 34.51, 25.28 (low intensity likely due to splitting into quintet caused by H/D exchange).

HR-ESI-MS ( $m/z$ ): meas. 504.1270  $[\text{M}+2\text{H}-\text{Na}]^+$ , calc. 504.1278 ( $\text{C}_{26}\text{H}_{19}\text{N}_5\text{NaO}_5$ ) $^+$ .

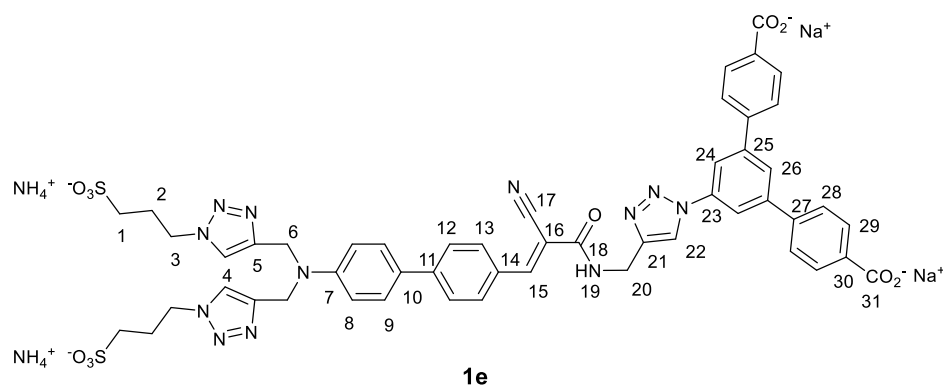

**1f** (1.00 eq, 20.6 mg, 28  $\mu\text{mol}$ ) was dissolved in  $\text{H}_2\text{O}/\text{MeOH}$  (2:1, 3 mL), **9** (1.03 eq, 11.6 mg, 29  $\mu\text{mol}$ ) was added and to the suspension was added  $\text{CuSO}_4 \cdot 5 \text{H}_2\text{O}$  (0.20 eq, 1.4 mg, 6  $\mu\text{mol}$ ) and sodium ascorbate (0.22 eq, 1.2 mg, 7  $\mu\text{mol}$ ) under argon atmosphere. The mixture was stirred at room temperature for 3 h, during which time the suspension turned into a clear orange solution. ACN (~30 mL) was added, and the precipitate was collected by centrifugation. The solids were dried in high vacuum to obtain the pure product (**1e**, 23.9 mg, 81 %) as an orange-red solid.

$^1\text{H}$ -NMR spectrum of a concentrated sample used for 2D-NMR and  $^{13}\text{C}$ -NMR measurements, which was used for the assignment of the signals to the structure:

$^1\text{H}$ -NMR (500 MHz,  $\text{DMSO}-d_6 + \text{AcOH}$ )  $\delta$  = 9.10 (s, 1H, H19), 9.01 (s, 1H, H22), 8.23 (s, H15), 8.22 (s, H24), 8.10 (s, H28, H29, H26), 8.03 (s, H4), 7.99 (d,  $J$  = 8.3, H13), 7.82 (d,  $J$  = 8.1, 2H, H12), 7.64 (d,  $J$  = 8.2, 2H, H9), 7.02 (d,  $J$  = 8.3, 2H, H8), 4.71 (s, 4H, H6), 4.62 (s, 2H), 4.44 (t,  $J$  = 7.1, 4H, H3), 2.44 – 2.41 (m, H1), 2.12 – 2.08 (m, H2). Integrals for peaks from 8.23 to 7.99 could not be determined separately in this spectrum, due to broadening of the peaks; the total integral is 16. The aliphatic H1 and H2 overlap with AcOH.

$^1\text{H}$ -NMR spectrum of a sample with lower concentration, used for comparison to [2]rotaxane **1ec2**:

$^1\text{H}$ -NMR (400 MHz,  $\text{DMSO}-d_6 + \text{AcOH}$ )  $\delta$  = 9.10 (t,  $J$  = 5.7, 1H), 9.02 (s, 1H), 8.28 (s, 2H), 8.21 (s, 1H), 8.14 (s, 1H), 8.11 – 8.04 (m, 8H), 8.03 (s, 2H), 7.98 (d,  $J$  = 8.4, 2H), 7.82 (d,  $J$  = 8.3, 2H), 7.63 (d,  $J$  = 8.6, 2H), 7.00 (d,  $J$  = 8.5, 2H), 4.71 (s, 4H), 4.62 (d,  $J$  = 5.1, 2H), 4.42 (t,  $J$  = 7.1, 4H), 2.40 – 2.37 (m, 4H), 2.07 – 2.04 (m).

$^{13}\text{C}$ -NMR (126 MHz,  $\text{DMSO}-d_6 + \text{AcOH}$ )  $\delta$  = 161.6 (C18), 150.4 (C15), 148.3 (C7), 145.9 (C21), 144.3 (C5, extracted from HMBC), 144.1 (C11), 142.0 (C23), 141.6 (C27), 138.0 (C25), 131.0 (C13), 129.2 (C14), 128.4 (C29 or C28), 127.6 (C9), 126.1 (C10), 125.8 (C12), 125.3 (C28 or C29), 123.2 (C4), 121.8 (C22), 118.1 (traces of  $\text{CH}_3^{13}\text{CN}$ ), 117.7 (C24), 116.8 (C17), 113.1 (C8), 104.1 (C16), 48.6 (C3), 48.1 (C1), 45.6 (C6), 35.4 (C20), 26.5 (C2), 1.2 (traces of  $^{13}\text{CH}_3\text{CN}$ ). H28 and H29 did not show signals in HMBC, making the assignment of C30 and C31 impossible, as they are also not visible in the  $^{13}\text{C}$ -NMR spectrum, likely due to different protonation states of the carboxylic acid.

HR-ESI-MS ( $m/z$ ): meas. 532.1355  $[\text{M}-2\text{Na}-2\text{NH}_4+2\text{H}]^{2-}$ , calc. 532.1352 ( $\text{C}_{51}\text{H}_{44}\text{N}_{12}\text{O}_{11}\text{S}_2$ ) $^{2-}$ .

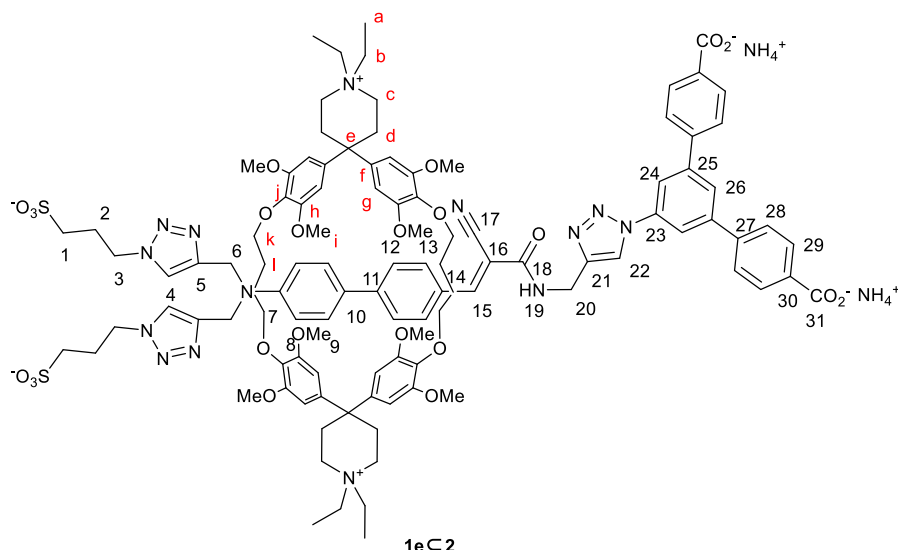

Dye **1f** (20 mg, 27.0  $\mu\text{mol}$ , 1.0 equiv.) and host **2** (34.7 mg, 32.4  $\mu\text{mol}$ , 1.2 equiv.) were dissolved in  $\text{H}_2\text{O}$  (16.5 mL) and degassed for 20 min. To this solution was added stopper **9** (12 mg, 29.7  $\mu\text{mol}$ , 1.1 equiv.),  $\text{CuSO}_4 \cdot 5 \text{H}_2\text{O}$  (6.7 mg, 27.0  $\mu\text{mol}$ , 1.0 equiv.), and sodium ascorbate (5.5 mg, 27.0  $\mu\text{mol}$ , 1.0 equiv.) as solids. The solution was stirred at room temperature and LC-MS indicated complete consumption of **1f** after 1.5 h. The reaction mixture was concentrated under reduced pressure and the solids purified by consecutive runs of reverse-phase HPLC on C-18 functionalized Silica stationary phase ( $\text{H}_2\text{O}/\text{ACN}$ , 67/33, containing 0.5%  $\text{HCO}_2\text{H}$ ). The orange residue was dissolved in  $\text{H}_2\text{O}$  (~15 mL) and filled into a MWCO 1000 dialysis tube to dialyze against ~3 L Milli-Q  $\text{H}_2\text{O}$  over night. After concentration under reduced pressure, the product was further purified by Sephadex LH-20 in DMF/ $\text{H}_2\text{O}$  containing 100 mM  $\text{NH}_4\text{OAc}$  as buffer. For mild removal of DMF, toluene was added and the solvents were evaporated under reduced pressure. Dialysis was repeated as above and the pure product was obtained as an orange film after concentration and drying on high vacuum (**1eC2**, 0.5 mg, 0.9 %).

$^1\text{H}$ -NMR (600 MHz,  $\text{CD}_3\text{CN}/\text{D}_2\text{O}$  1:1)  $\delta$  = 8.53 (s, 1H, H22), 8.33 (s, 0H, integral too low due to H/D exchange, H19), 8.11 (s, 1H, H26), 8.09 (s, 2H, H24), 7.97 (d,  $J$  = 8.2, 4H, H29), 7.81 (d,  $J$  = 8.2, 4H, H28), 7.77 (s, 2H, H4), 7.65 (s, 1H, H15), 6.70 (s, 8H, H-g), 6.64 (d,  $J$  = 8.3, 2H, H13), 6.56 (d,  $J$  = 8.6, 2H, H8), 6.00 (d,  $J$  = 8.5, 2H, H9), 5.54 (d,  $J$  = 8.3, 2H, H12), 4.68 (s, 6H, H6, H20), 4.47 (t,  $J$  = 7.1, 4H, H3), 3.66 – 3.41 (m, 26H, expected: 24H, H-i), 3.31 – 3.13 (m, 16H, H-b, H-c), 3.05 – 2.95 (m, 10H, expected: 8H, H-k), 2.76 – 2.73 (m, 5H, expected: 4H, H1), 2.26 – 2.21 (m, 4H, H2), 1.24 – 1.11 (m, 30H, expected: 28H, H-a, H-d, H-l).

$^{13}\text{C}$  NMR (151 MHz,  $\text{CD}_3\text{CN}/\text{D}_2\text{O}$  1:1)  $\delta$  = 174.1 (C31\*\*), 163.0 (C18\*\*), 154.0 (C-h), 152.8 (C15\*), 148.9 (C7\*\*), 146.4 (C21\*\*), 146.2 (C5), 144.3 (C11\*\*), 143.8 (C30), 141.9 (C27\*\*), 138.8 (C23\*\*), 138.0 (C25\*\*), 135.7 (C-j), 131.4 (C13\*), 130.9 (C29), 128.9 (C14\*\*), 128.0 (C9\*), 127.8 (C28), 127.1 (C26\*), 126.7 (C10\*\*), 125.4 (C12\*), 124.4 (C4), 123.2 (C22\*), 119.1 (C24\*), 117.8 (C17\*\*), 113.7 (C8\*), 104.1 (C-g\*), 102.6 (C16\*\*), 73.1 (C-k), 69.2 (C-b\*\*), 56.6 (C-i), 56.3 (C-c\*), 49.8 (C3), 48.7 (C1), 46.9 (C6\*), 44.1 (C-e), 36.2 (C20\*), 29.9 (C-d), 26.6 (C2), 26.0 (C-l), 7.4 (C-a). \* Extracted from HMQC. \*\* Extracted from HMBC.

HR-ESI-MS ( $m/z$ ): meas. 1033.4423  $[\text{M}+2\text{H}]^{2+}$ , calc. 1033.4432 ( $\text{C}_{109}\text{H}_{130}\text{N}_{14}\text{O}_{23}\text{S}_2$ ) $^{2+}$ ; 1044.4337  $[\text{M}+\text{H}+\text{Na}]^{2+}$ , calc. 1044.4342 ( $\text{C}_{109}\text{H}_{129}\text{N}_{14}\text{NaO}_{23}\text{S}_2$ ) $^{2+}$ ; 1055.4252  $[\text{M}+\text{Na}_2]^{2+}$ , calc. 1055.4251 ( $\text{C}_{109}\text{H}_{128}\text{N}_{14}\text{Na}_2\text{O}_{23}\text{S}_2$ ) $^{2+}$ ; 1066.4152  $[\text{M}+\text{H}+\text{Na}_3]^{2+}$ , calc. 1066.4161 ( $\text{C}_{109}\text{H}_{127}\text{N}_{14}\text{Na}_3\text{O}_{23}\text{S}_2$ ) $^{2+}$ .

## References

- 1 P. Thordarson, *Chem Soc Rev*, 2011, **40**, 1305–1323.
- 2 A. M. Brouwer, *Pure Appl. Chem.*, 2011, **83**, 2213–2228.
- 3 A. Azhdari Tehrani, L. Esrafil, S. Abedi, A. Morsali, L. Carlucci, D. M. Proserpio, J. Wang, P. C. Junk and T. Liu, *Inorg. Chem.*, 2017, **56**, 1446–1454.
- 4 D. Dziuba, R. Pohl and M. Hocek, *Chem. Commun.*, 2015, **51**, 4880–4882.
- 5 P. Martinez-Bulit, B. H. Wilson and S. J. Loeb, *Org. Biomol. Chem.*, 2020, **18**, 4395–4400.

# NMR Spectra

<sup>1</sup>H-NMR spectrum of **5**

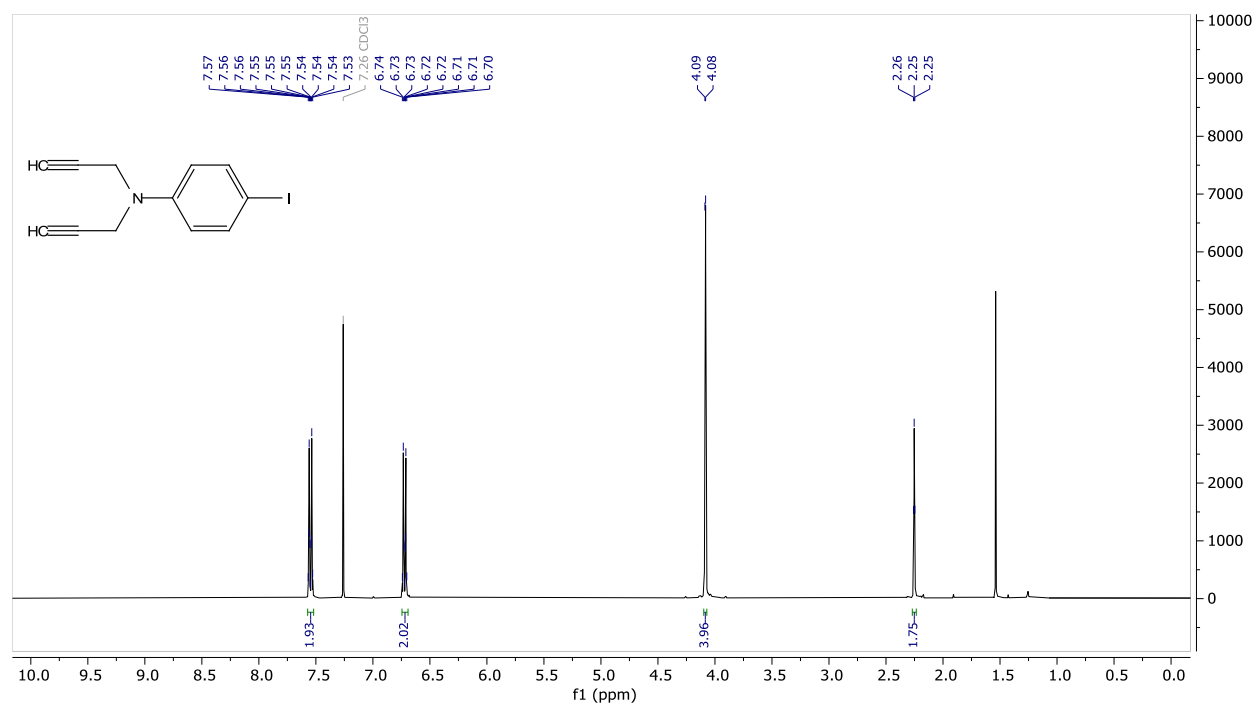

<sup>13</sup>C-NMR spectrum of **5**

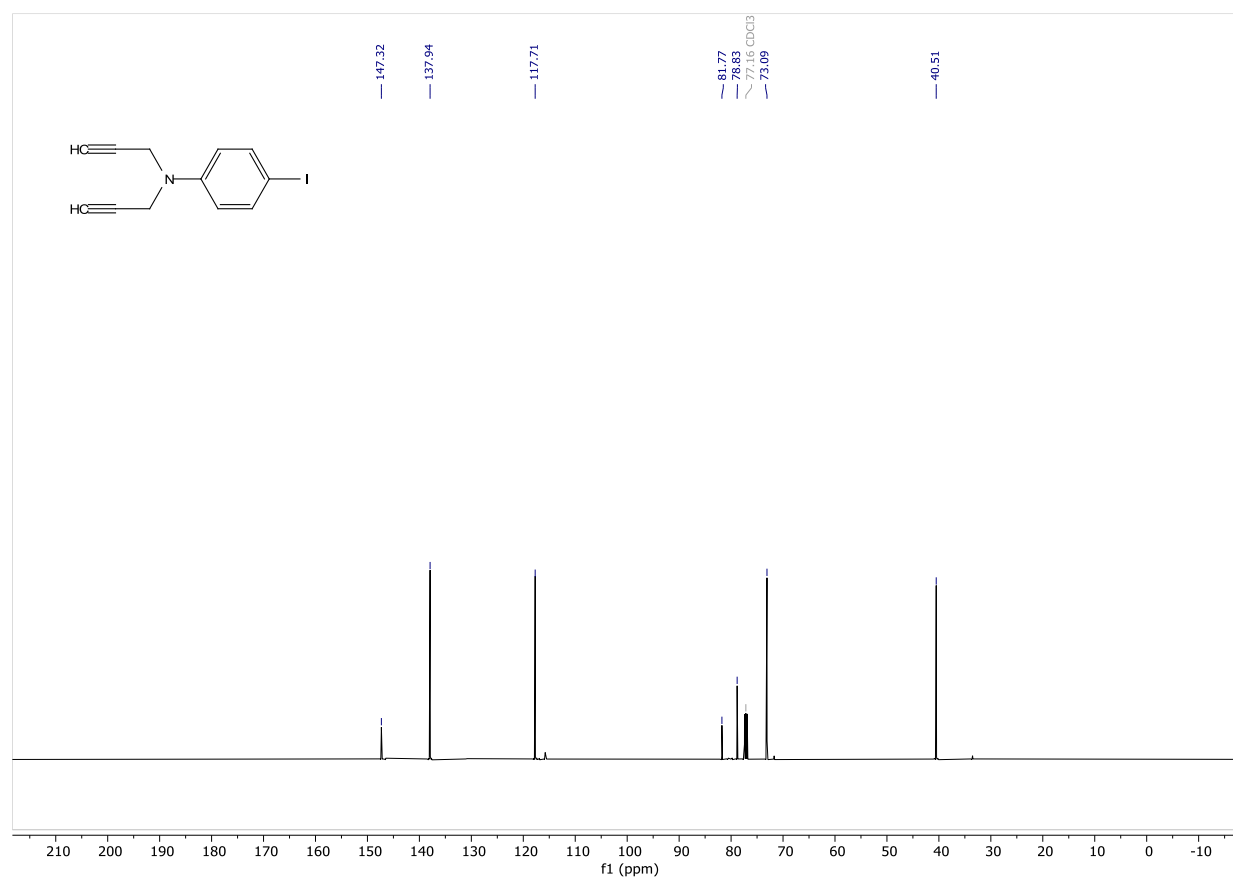

Chemical structure of compound 10 is shown as an inset. The structure consists of a central benzene ring substituted with an iodine atom (I) and two 1,2,4-triazole rings. Each triazole ring is further substituted with a propylsulfonate group (CH<sub>2</sub>CH<sub>2</sub>CH<sub>2</sub>SO<sub>3</sub><sup>-</sup> Na<sup>+</sup>).

<sup>1</sup>H NMR spectrum (D<sub>2</sub>O) of compound 10. The x-axis represents the chemical shift in ppm (f1), ranging from -0.5 to 10.0. The y-axis represents intensity, ranging from -1000 to 20000. The spectrum shows several peaks corresponding to the protons in the molecule.

Peak assignments and integrations are provided:

- 7.74 (1.90)
- 7.34 (2.02)
- 7.32 (2.02)
- 6.62 (2.02)
- 6.60 (2.02)
- 4.79 (4.10)
- 4.60 (4.31)
- 4.45 (4.18)
- 4.43 (4.37)
- 4.41 (4.18)
- 2.84 (2.83, 2.82, 2.80, 2.30, 2.28, 2.26, 2.24, 2.23) (4.18)
- 2.30 (4.37)

Chemical structure of the sodium salt of compound 10 is shown. The structure consists of a central benzene ring substituted with an iodine atom and two 4-(4-sulfamoylphenyl)-1H-1,2,4-triazol-1-ylmethyl groups. The sodium salt is indicated by Na<sup>+</sup> ions.

<sup>13</sup>C NMR spectrum (f1 (ppm)) showing peaks at the following chemical shifts (ppm): 147.17, 144.78, 137.84, 124.02, 116.49, 79.18, 48.77, 47.69, 45.91, and 25.22.

<sup>1</sup>H-NMR spectrum of **3**

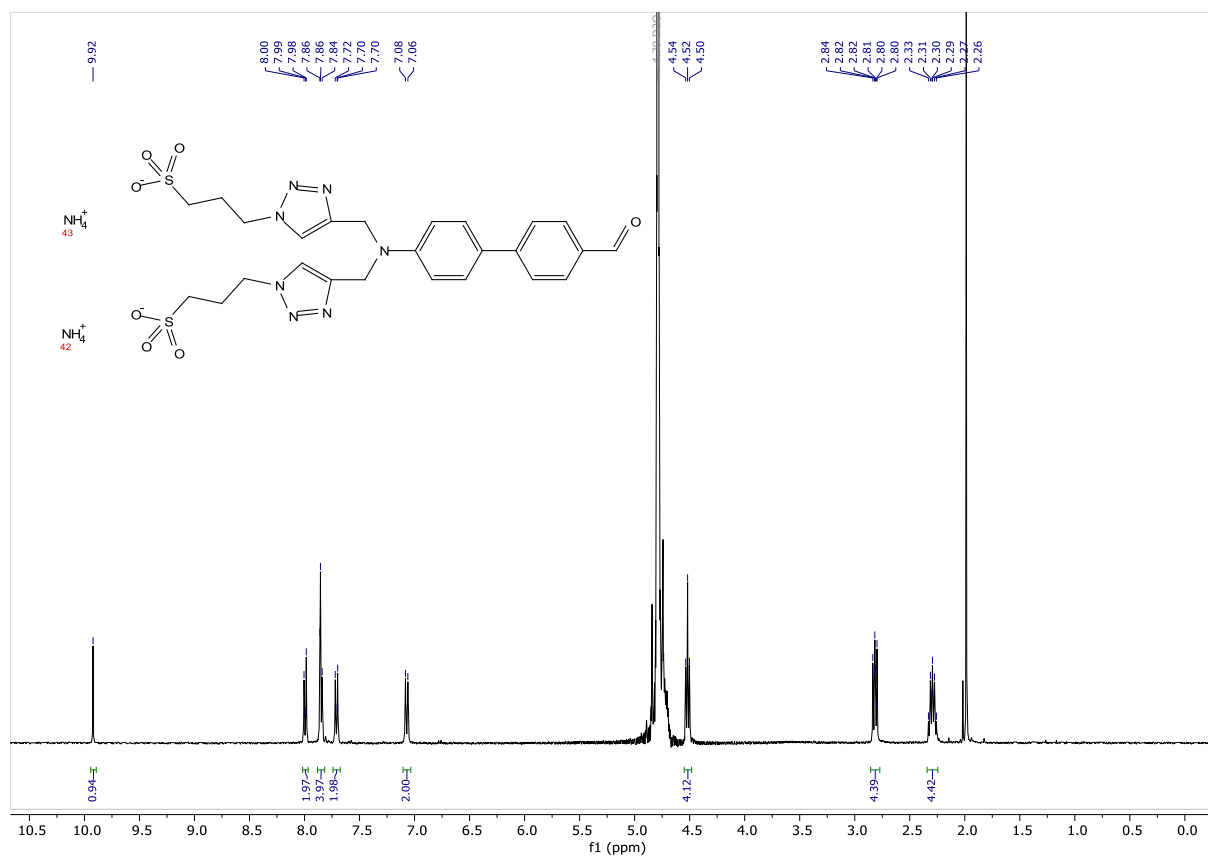

<sup>13</sup>C-NMR spectrum of **3**

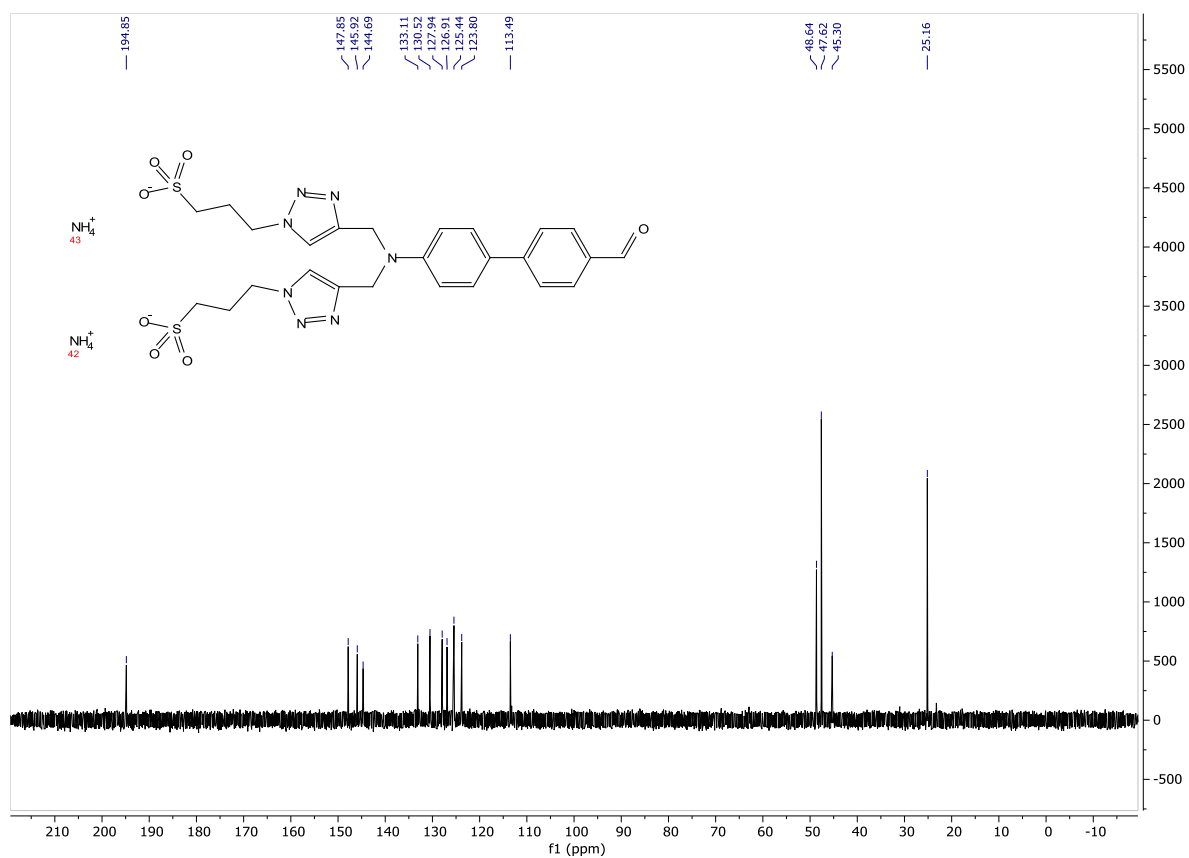

<sup>1</sup>H-NMR spectrum of **b**

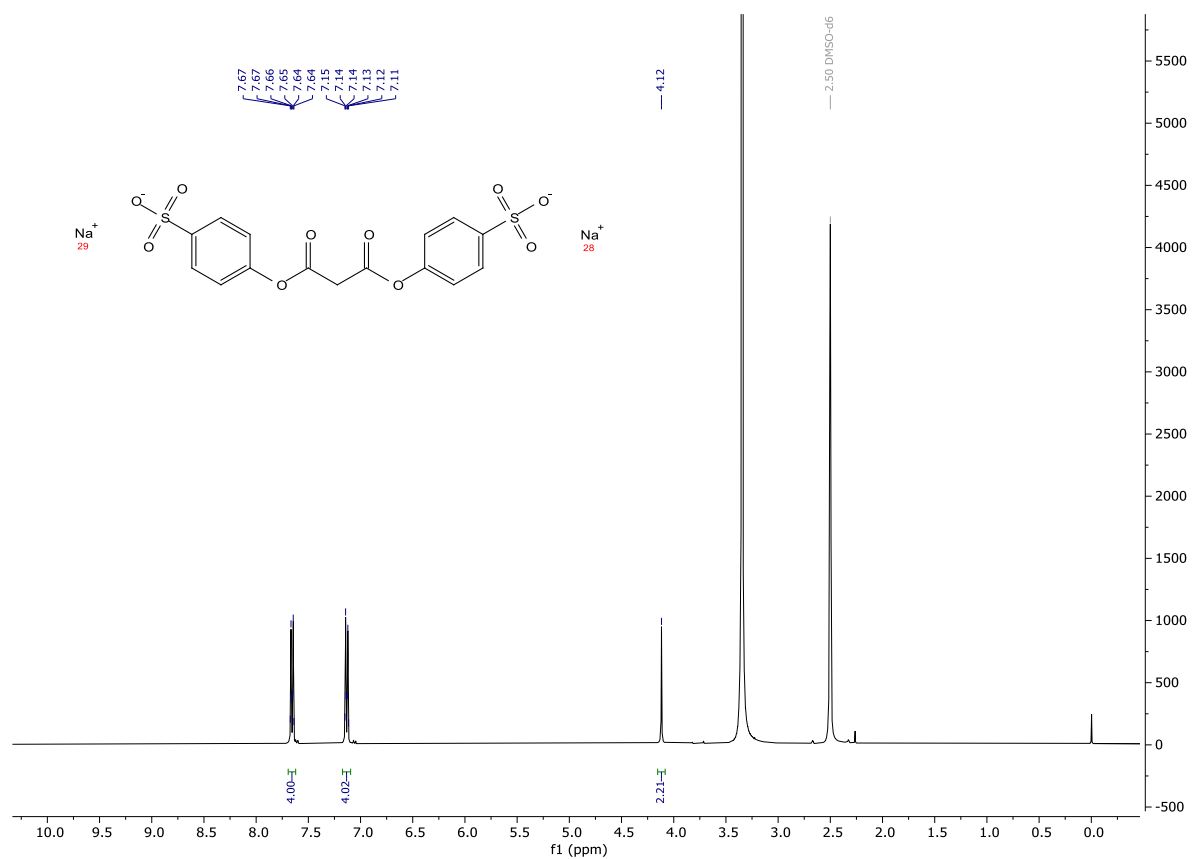

<sup>13</sup>C-NMR spectrum of **b**

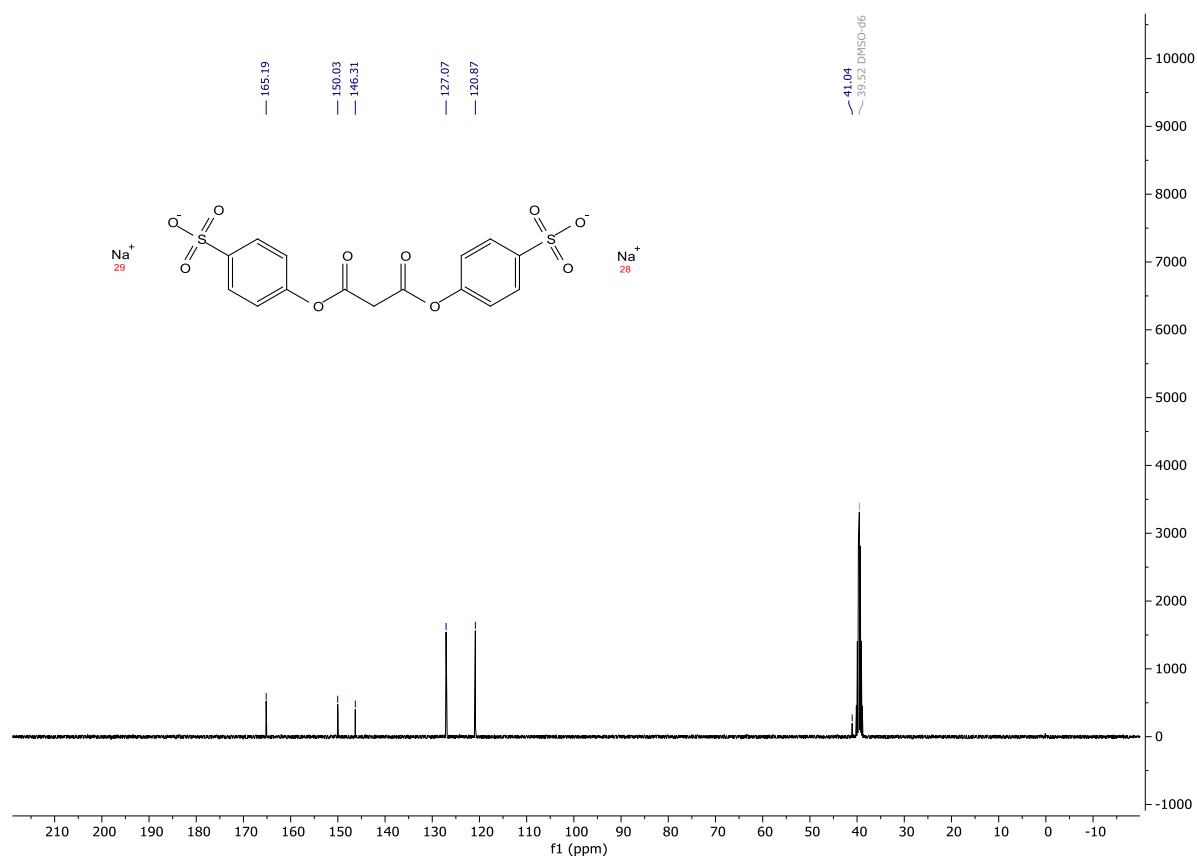

# <sup>1</sup>H-NMR spectrum of **S3**

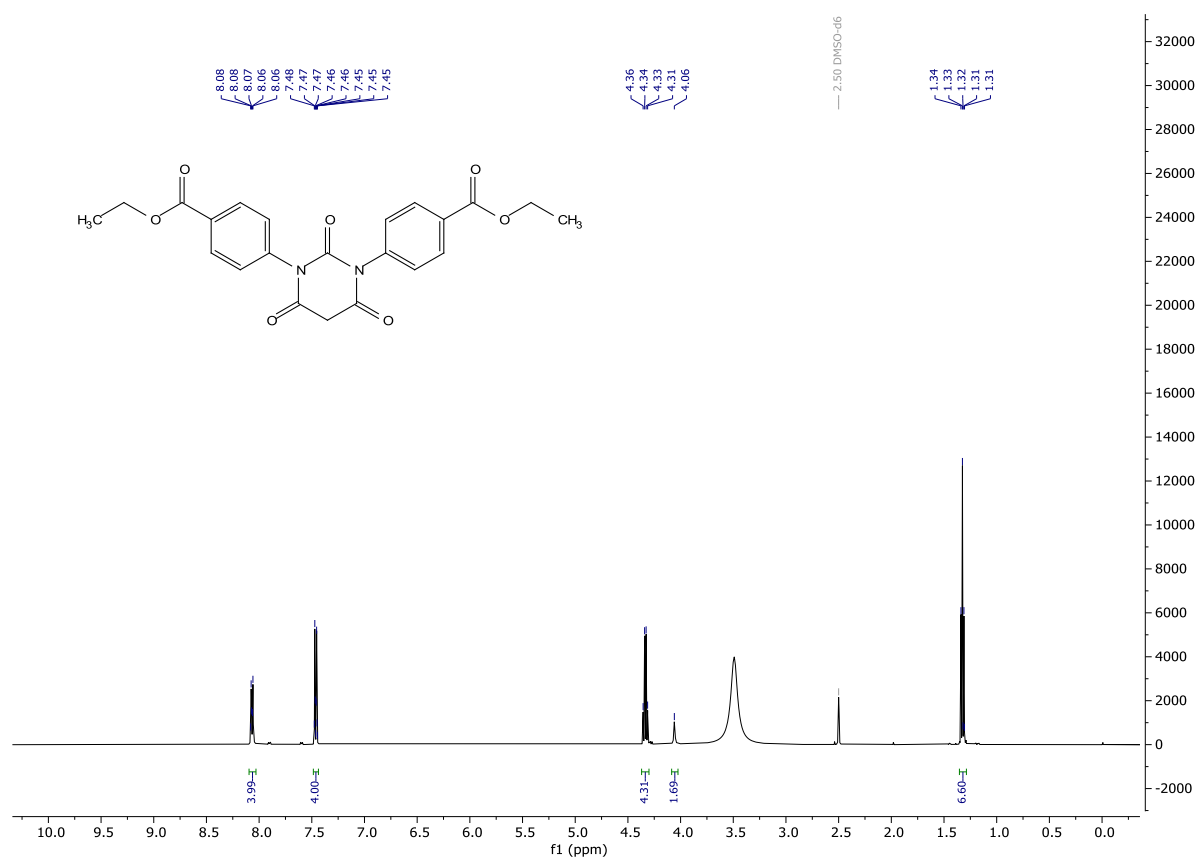

# <sup>13</sup>C-NMR spectrum of **S3**

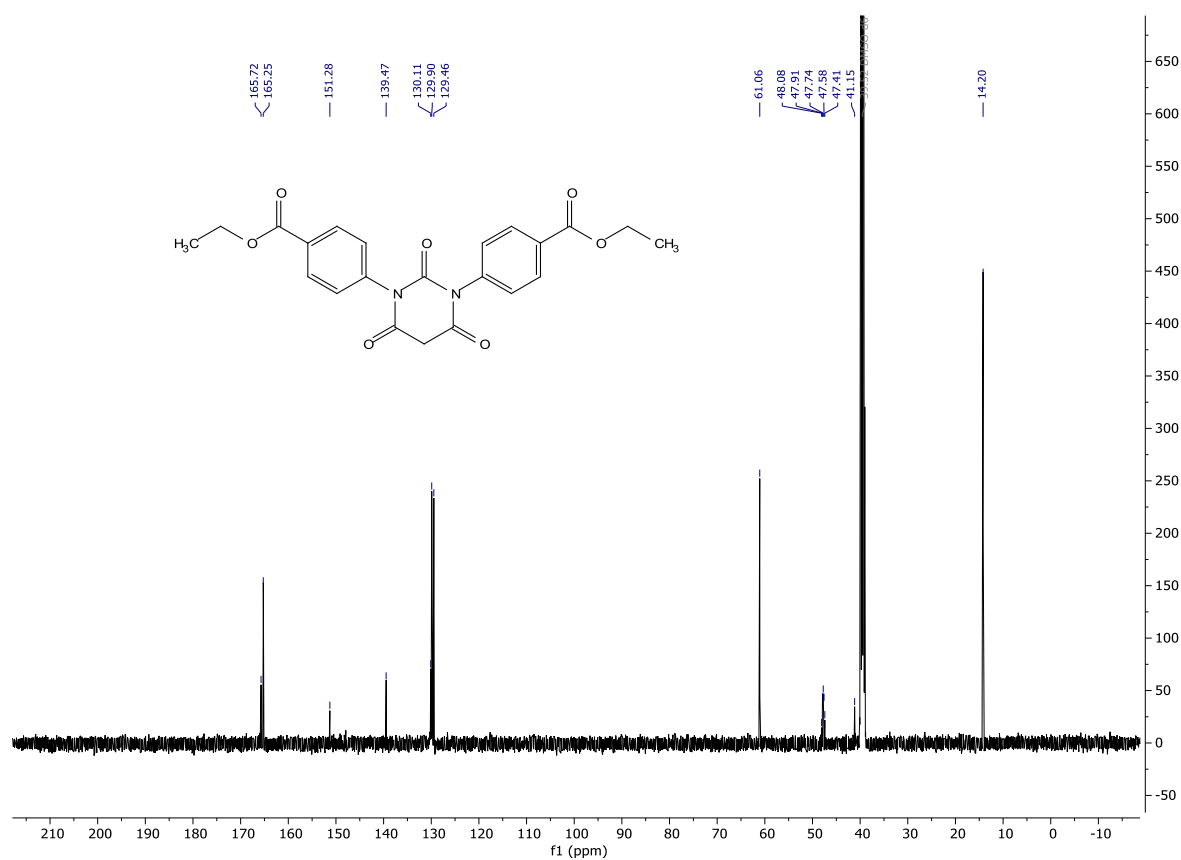

# <sup>1</sup>H-NMR spectrum of **c**

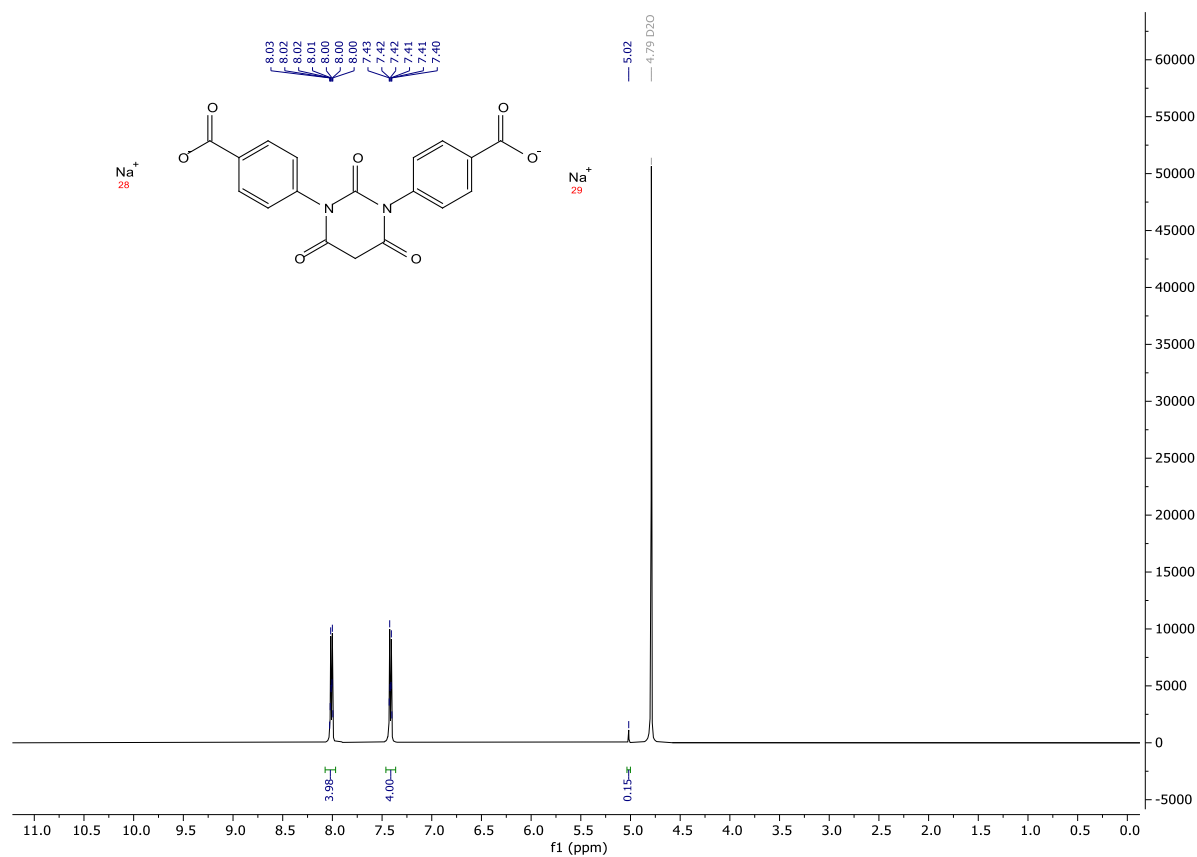

# <sup>13</sup>C-NMR spectrum of **c**

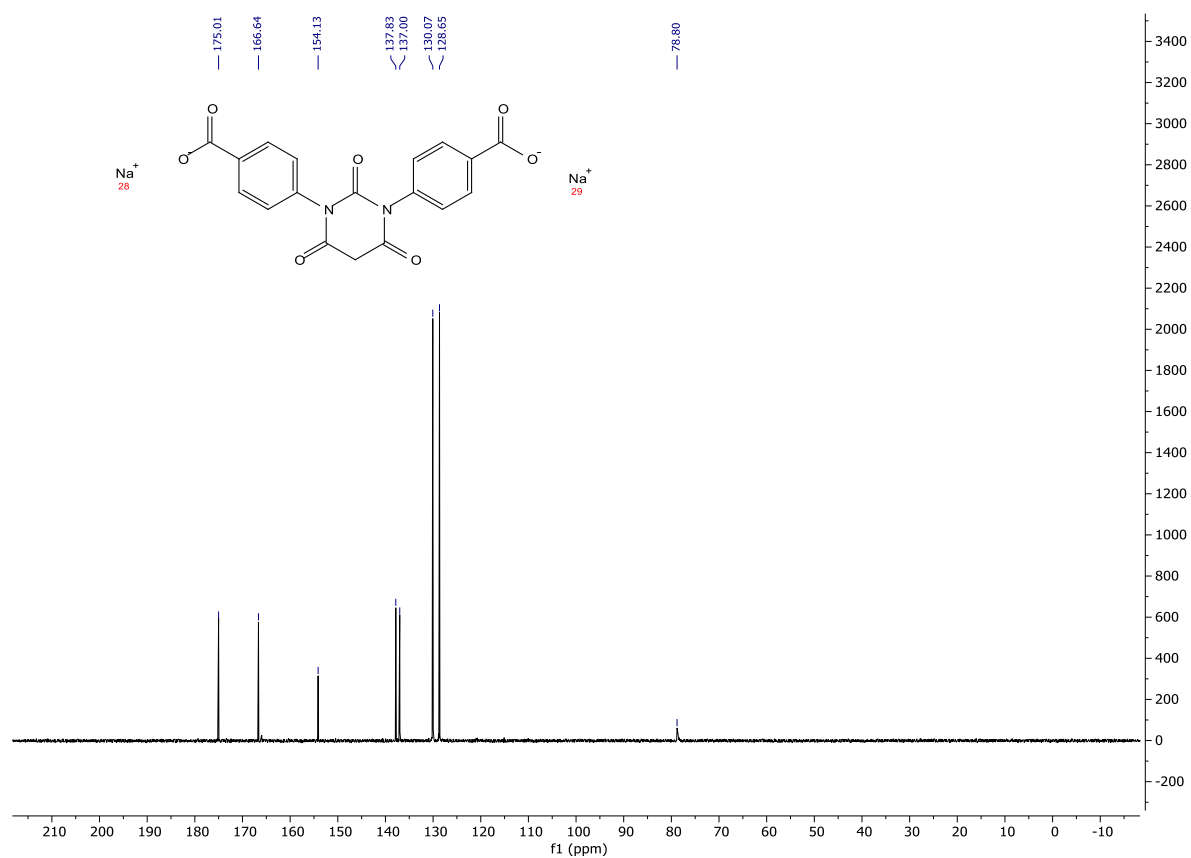

<sup>1</sup>H-NMR spectrum of **f** in DMSO-d<sub>6</sub>

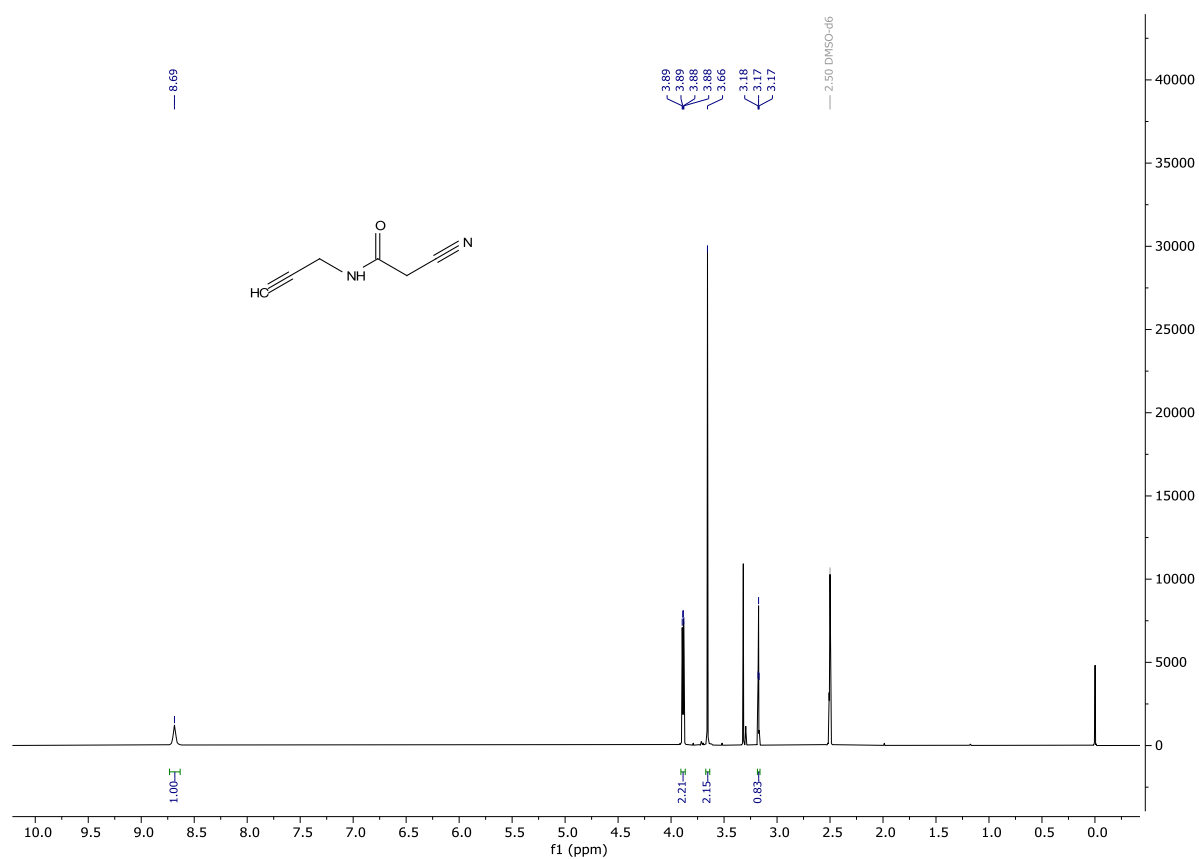

<sup>1</sup>H-NMR spectrum of **f** in CDCl<sub>3</sub>

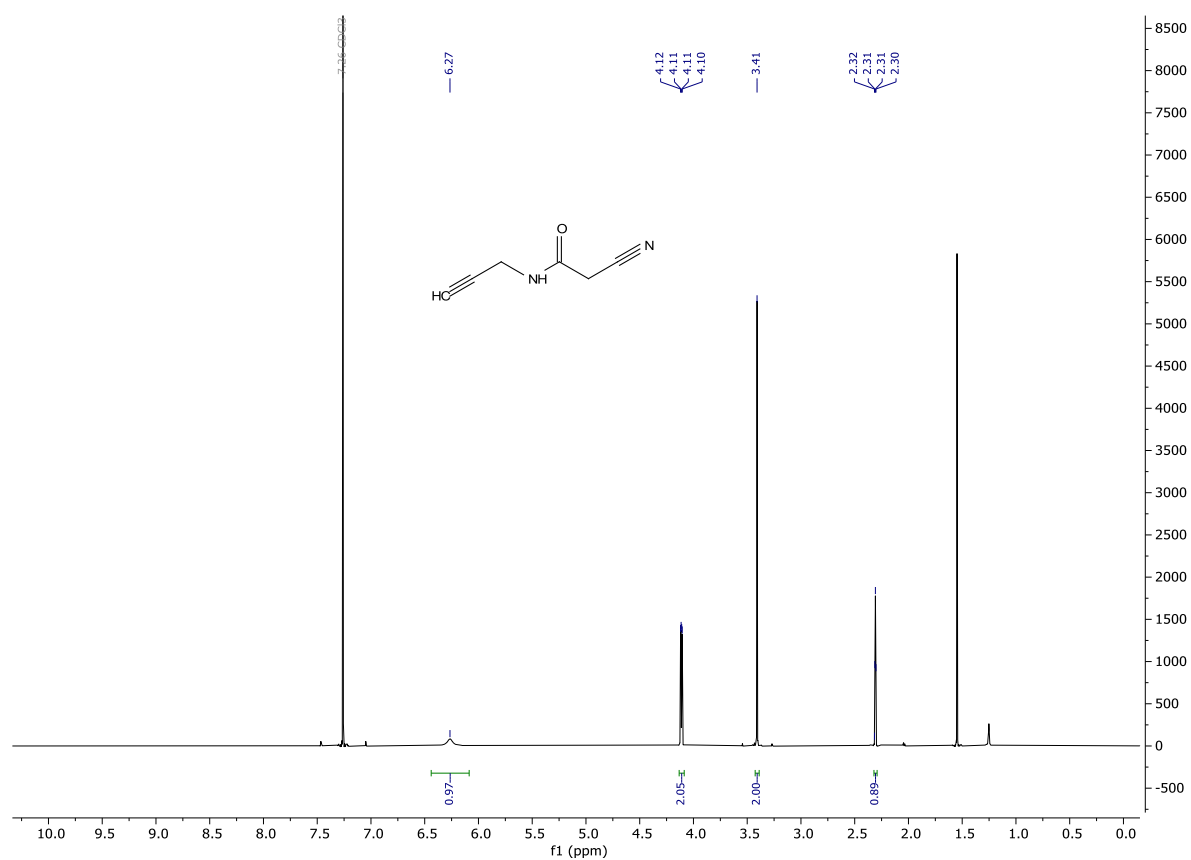

$^{13}\text{C}$ -NMR spectrum of **f** in DMSO- $d_6$

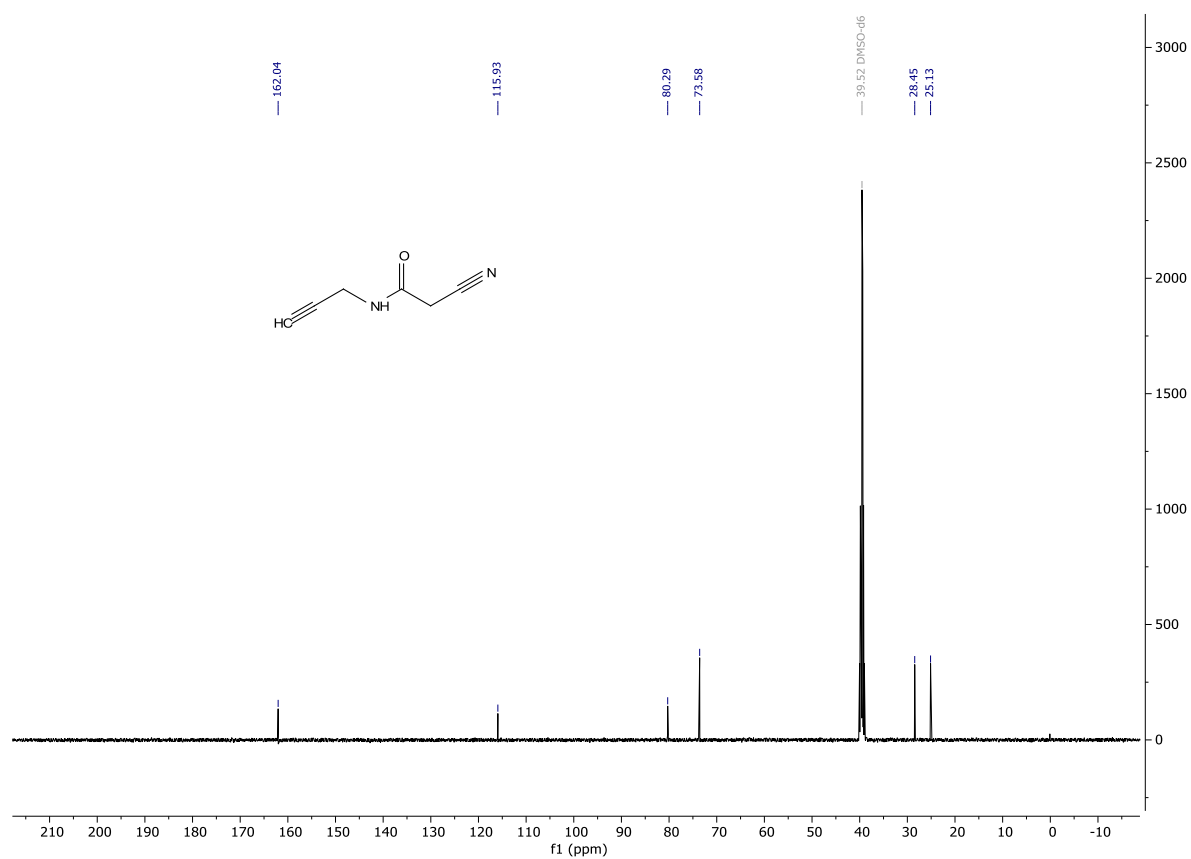

$^1\text{H}$ -NMR spectrum of **1a**

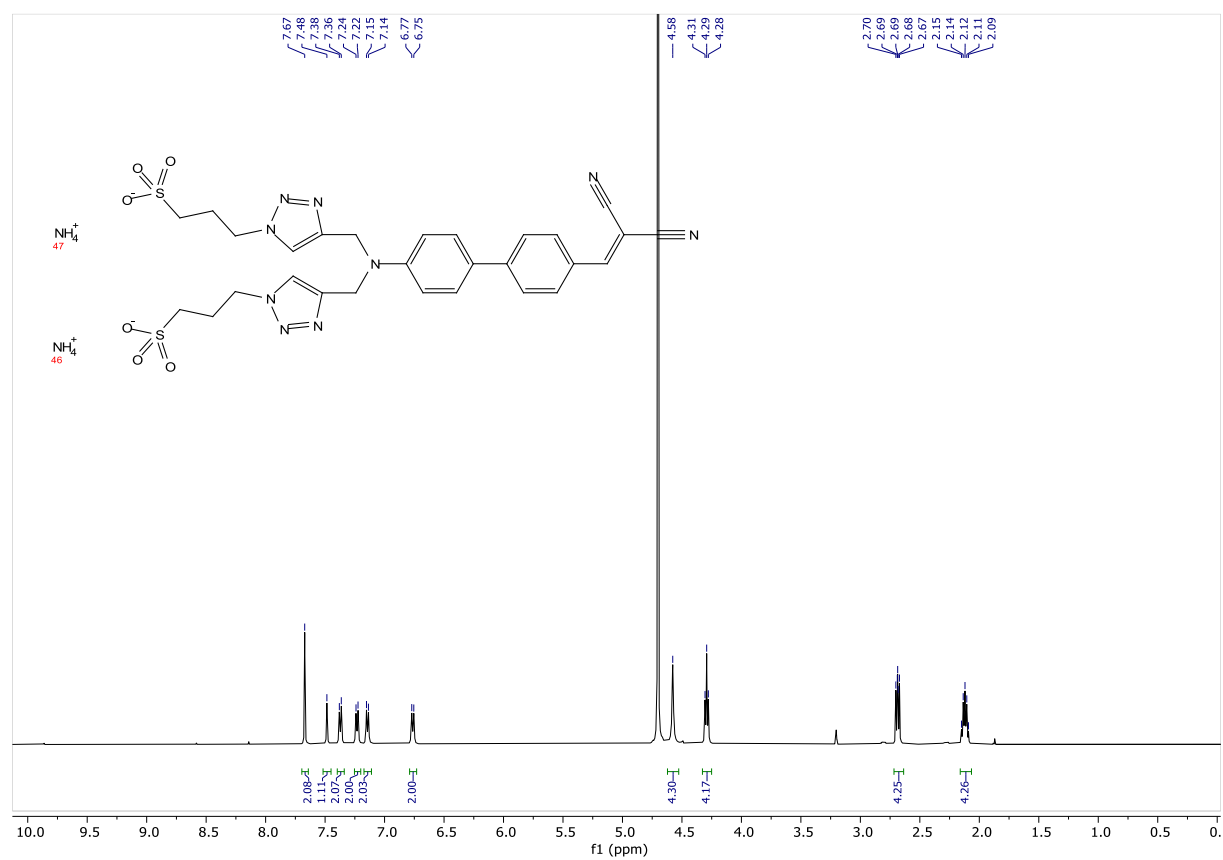

<sup>13</sup>C-NMR spectrum of **1a**

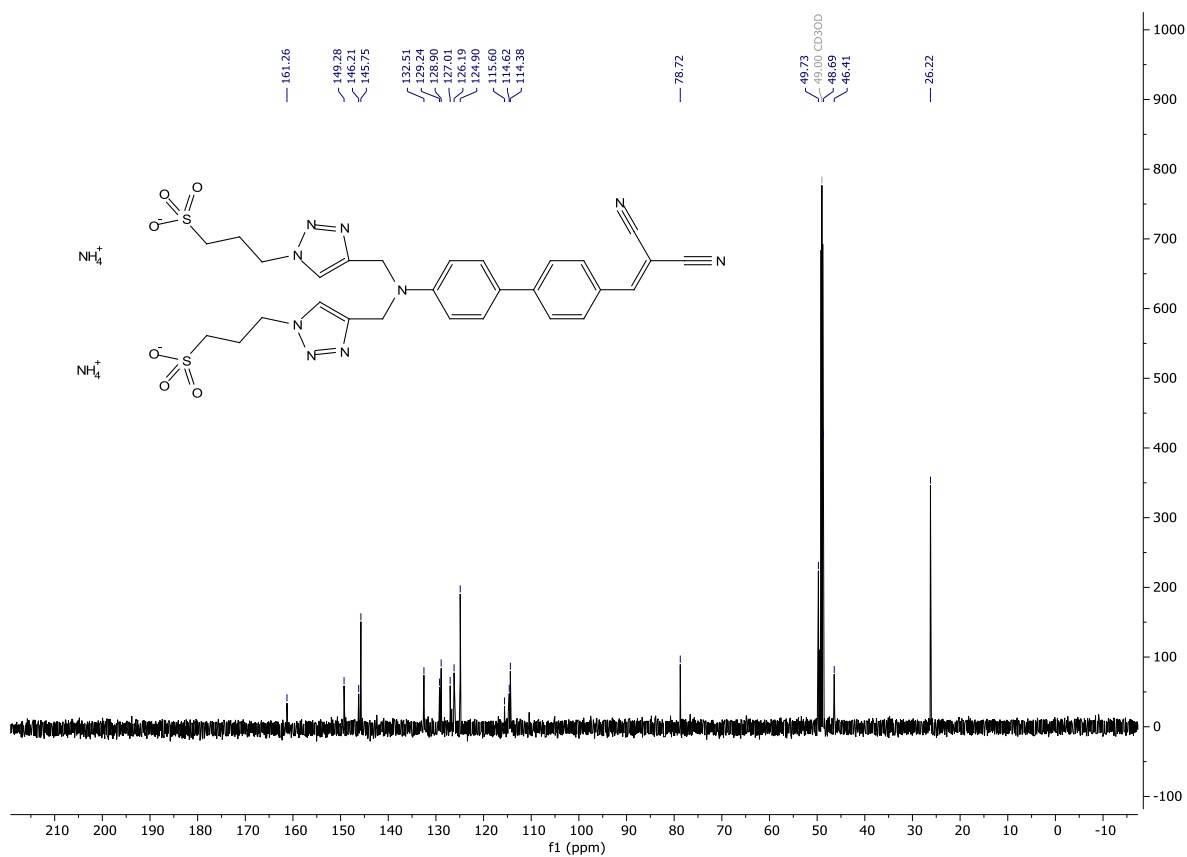

<sup>1</sup>H-NMR spectrum of **1f** in D<sub>2</sub>O/CD<sub>3</sub>CN 9:1

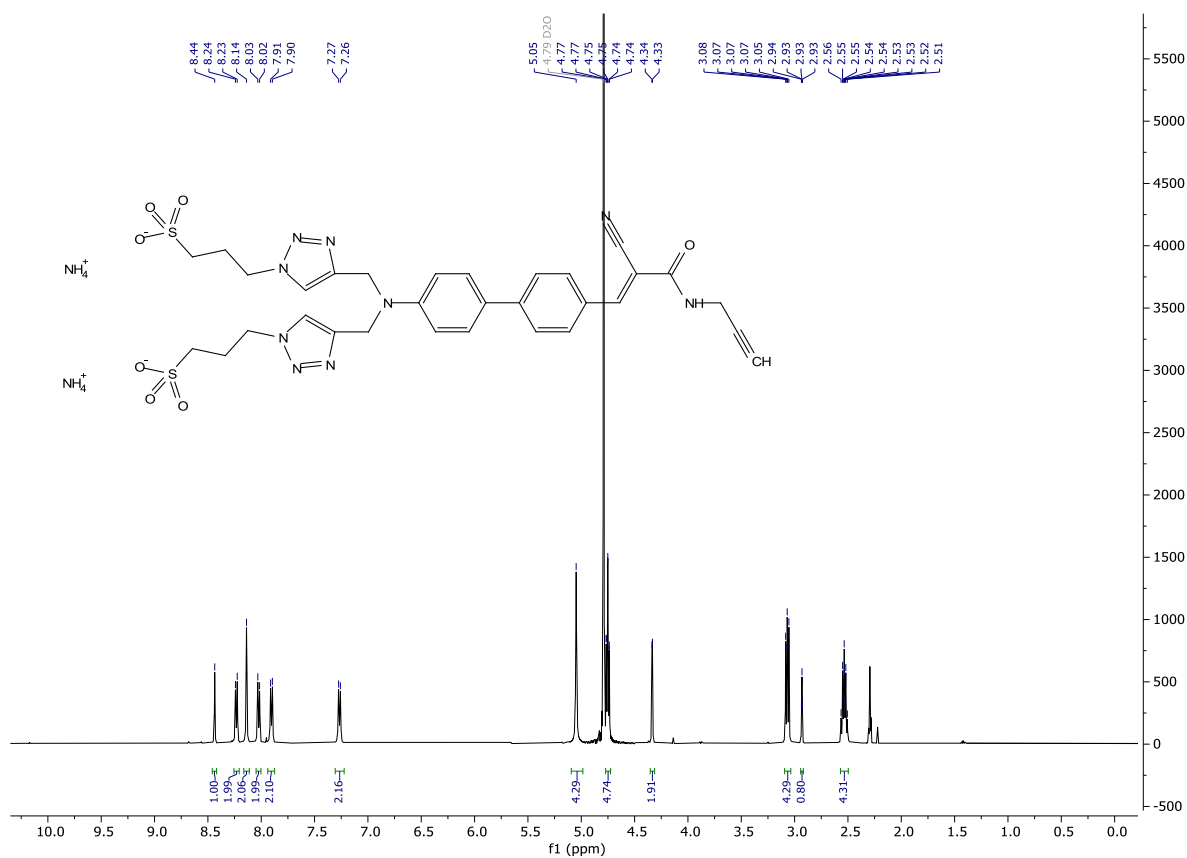

$^1\text{H}$ -NMR spectrum of **1f** in DMSO- $d_6$

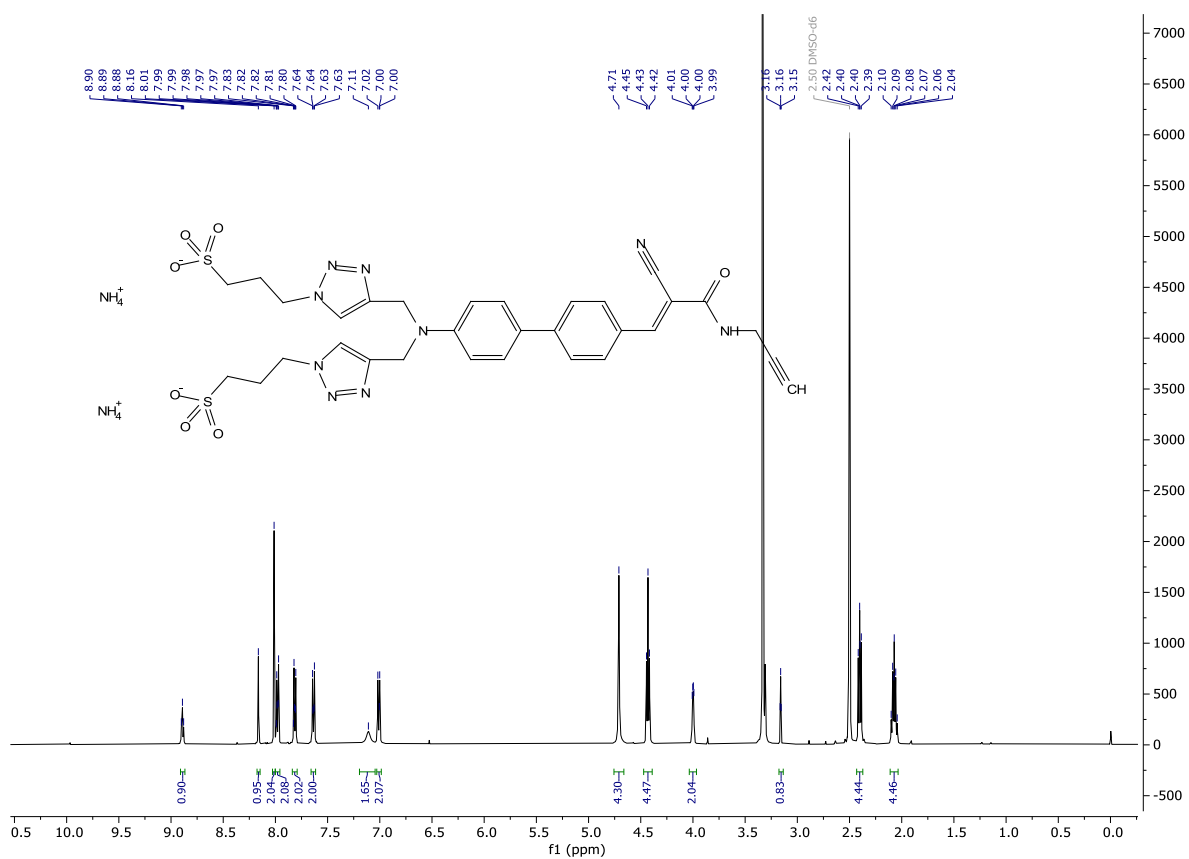

$^{13}\text{C}$ -NMR spectrum of **1f** in  $\text{D}_2\text{O}/\text{CD}_3\text{CN}$  9:1

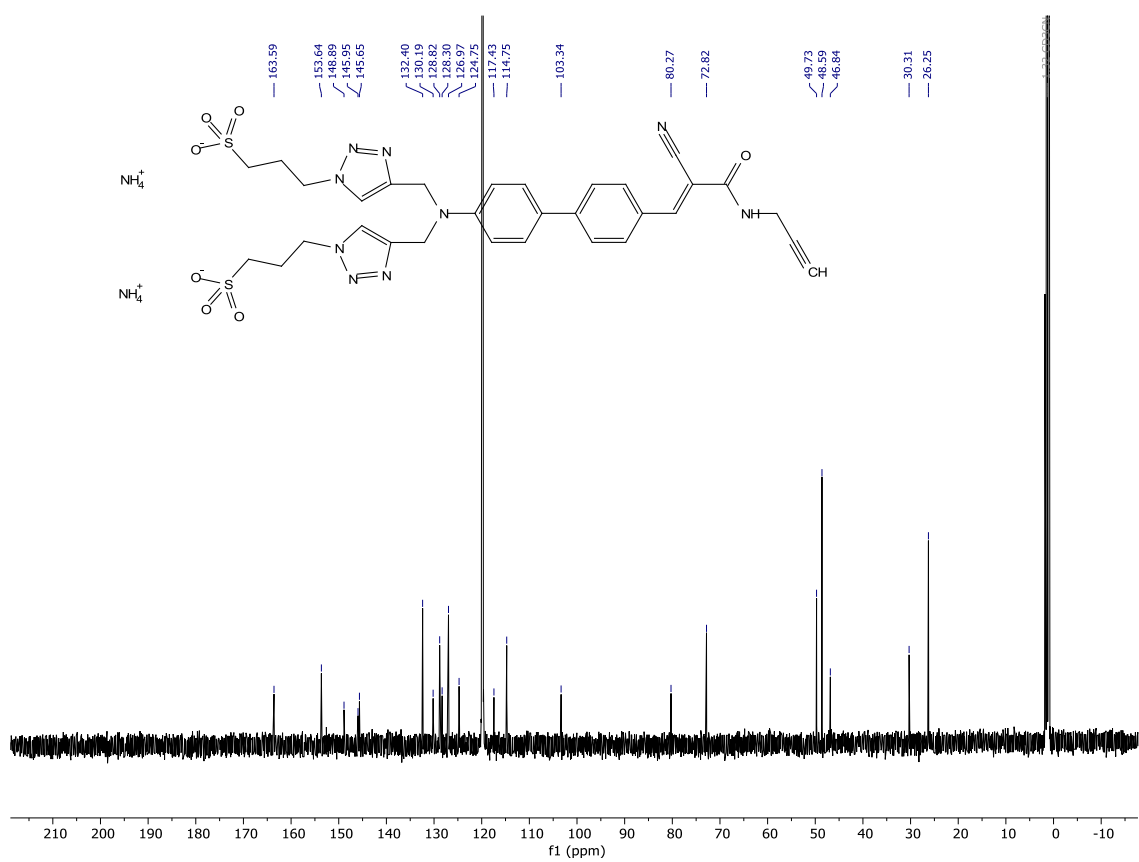

# <sup>1</sup>H-NMR spectrum of **8**

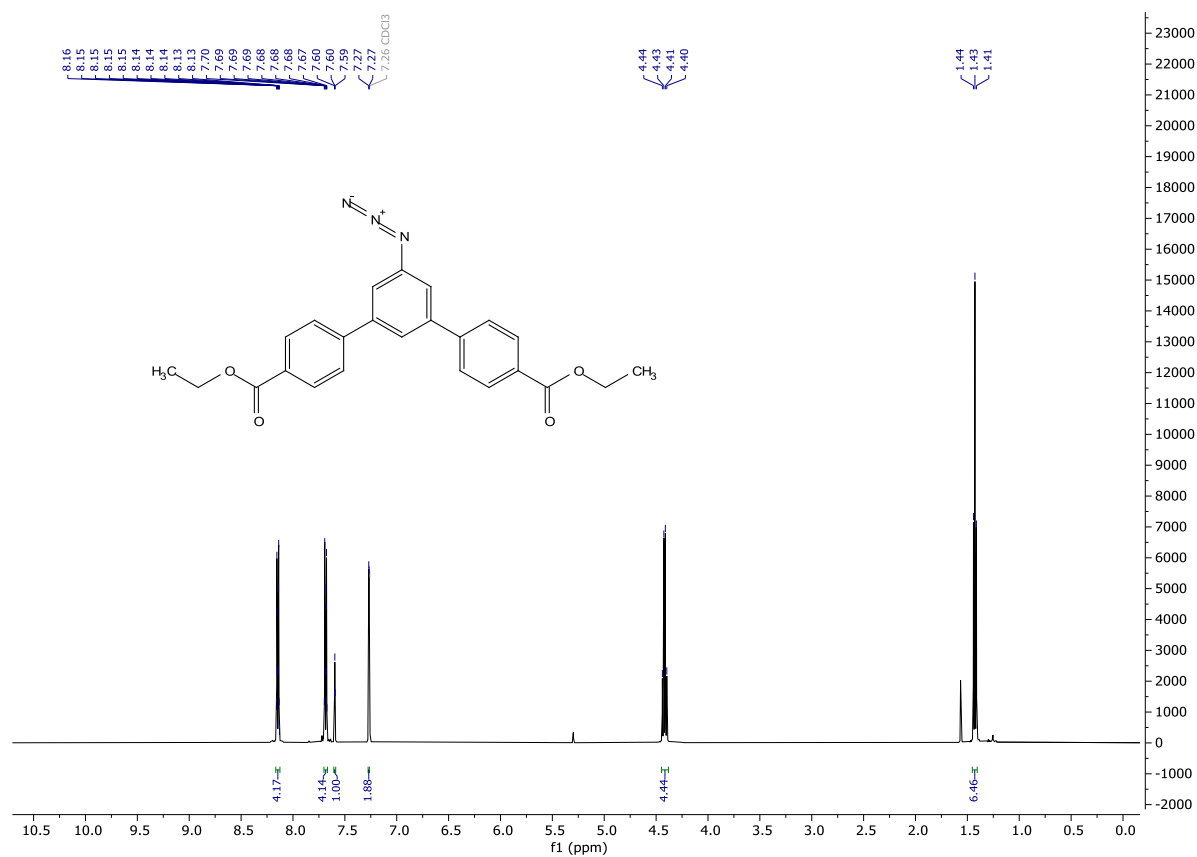

# <sup>13</sup>C-NMR spectrum of **8**

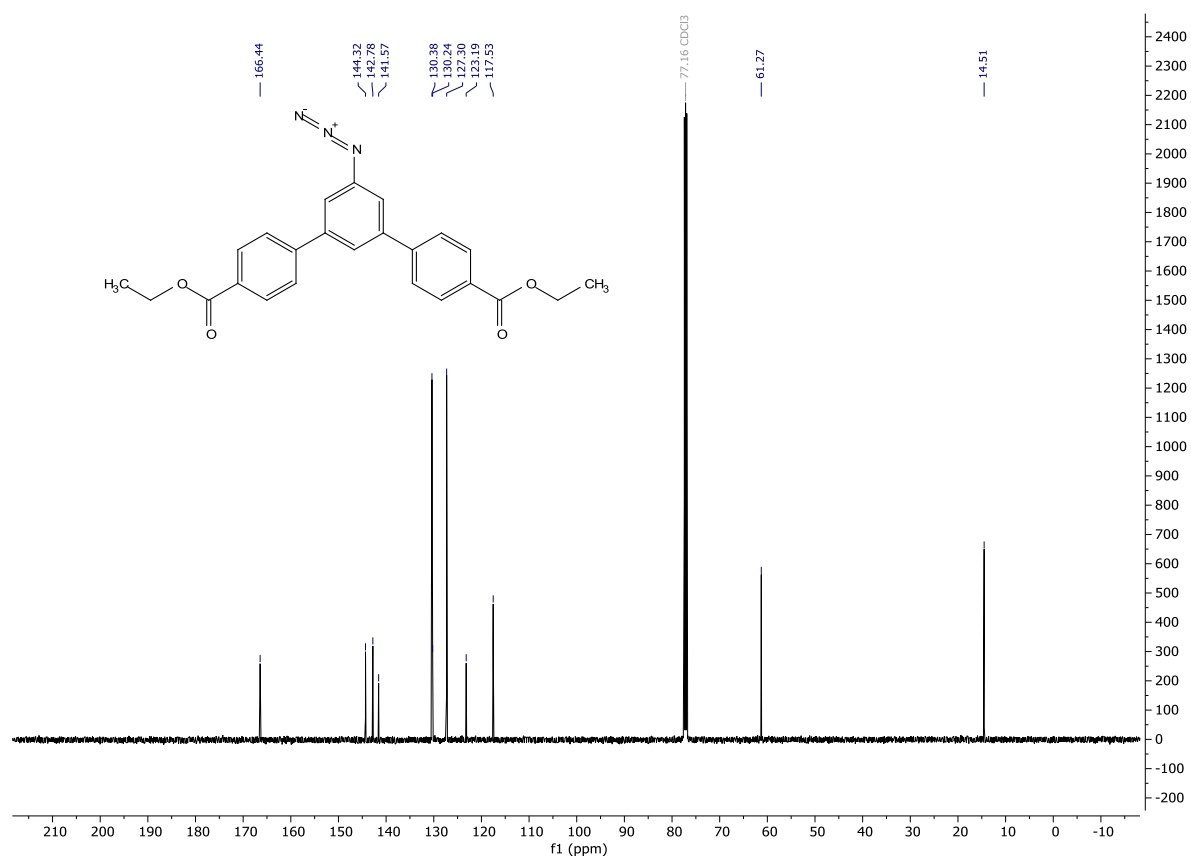

<sup>1</sup>H-NMR spectrum of **9**

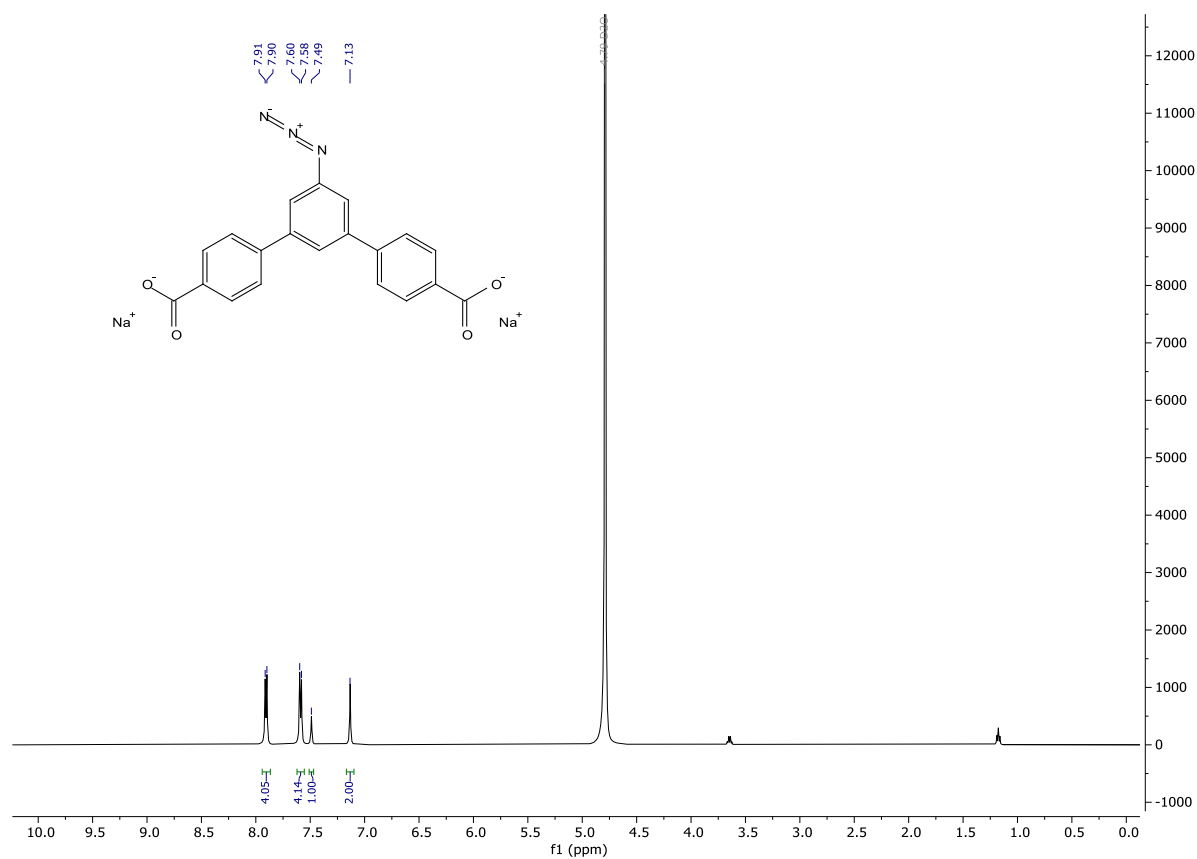

<sup>13</sup>C-NMR spectrum of **9**

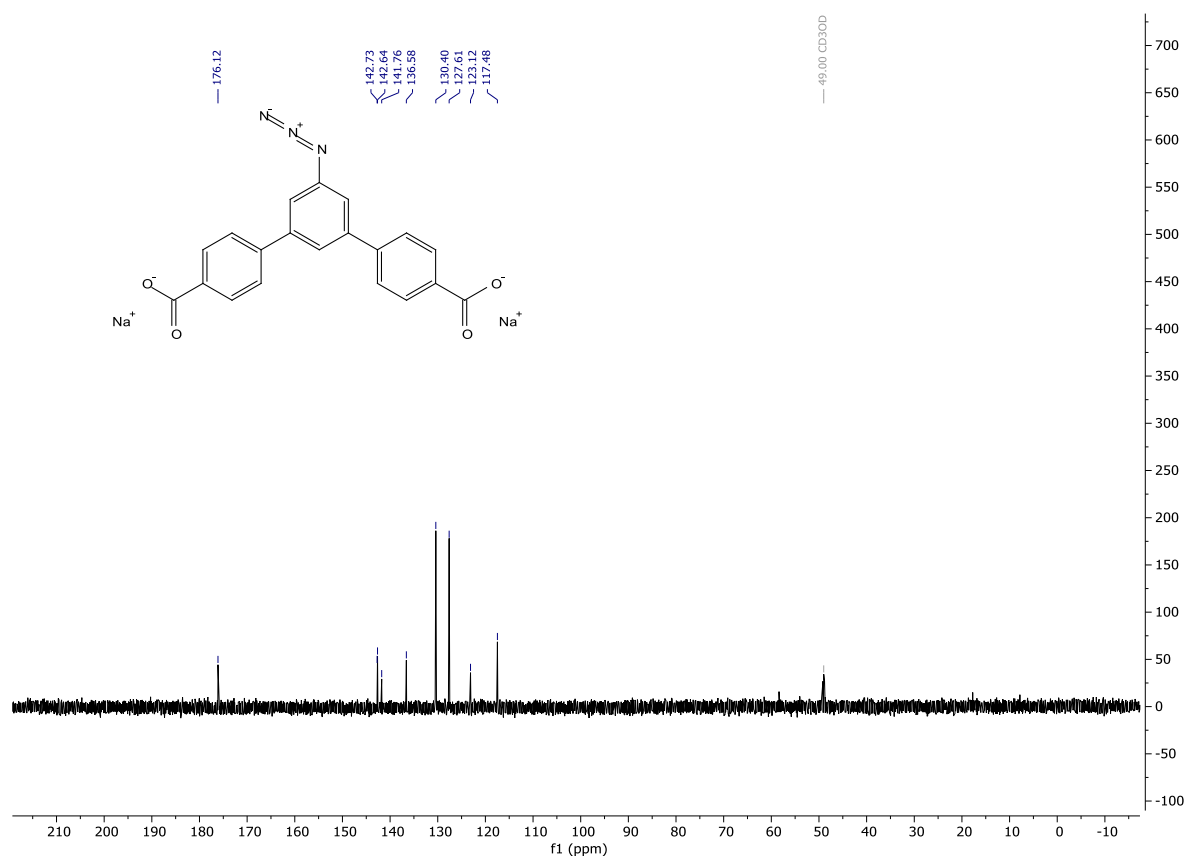

$^1\text{H}$ -NMR spectrum of **e** containing ACN as impurity, but with visible acidic  $\text{CH}_2$  group

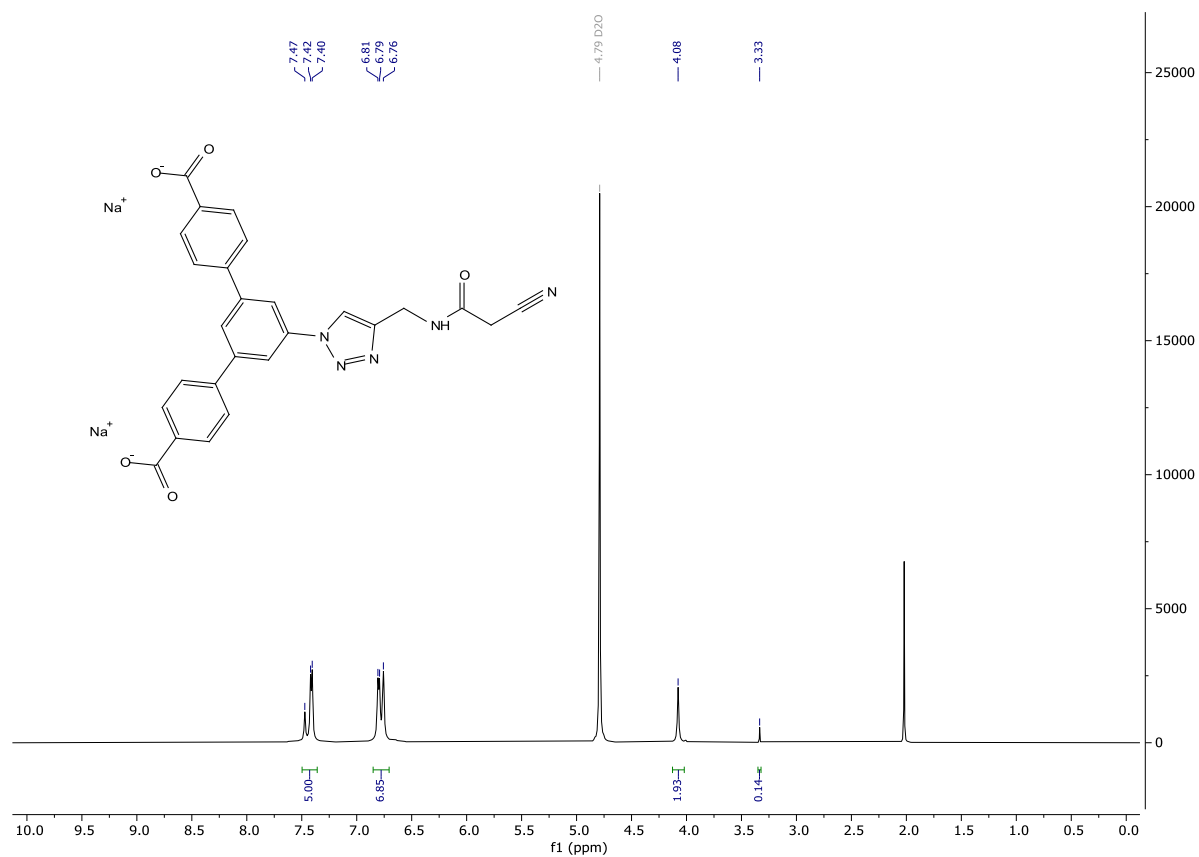

$^1\text{H}$ -NMR spectrum of **e**

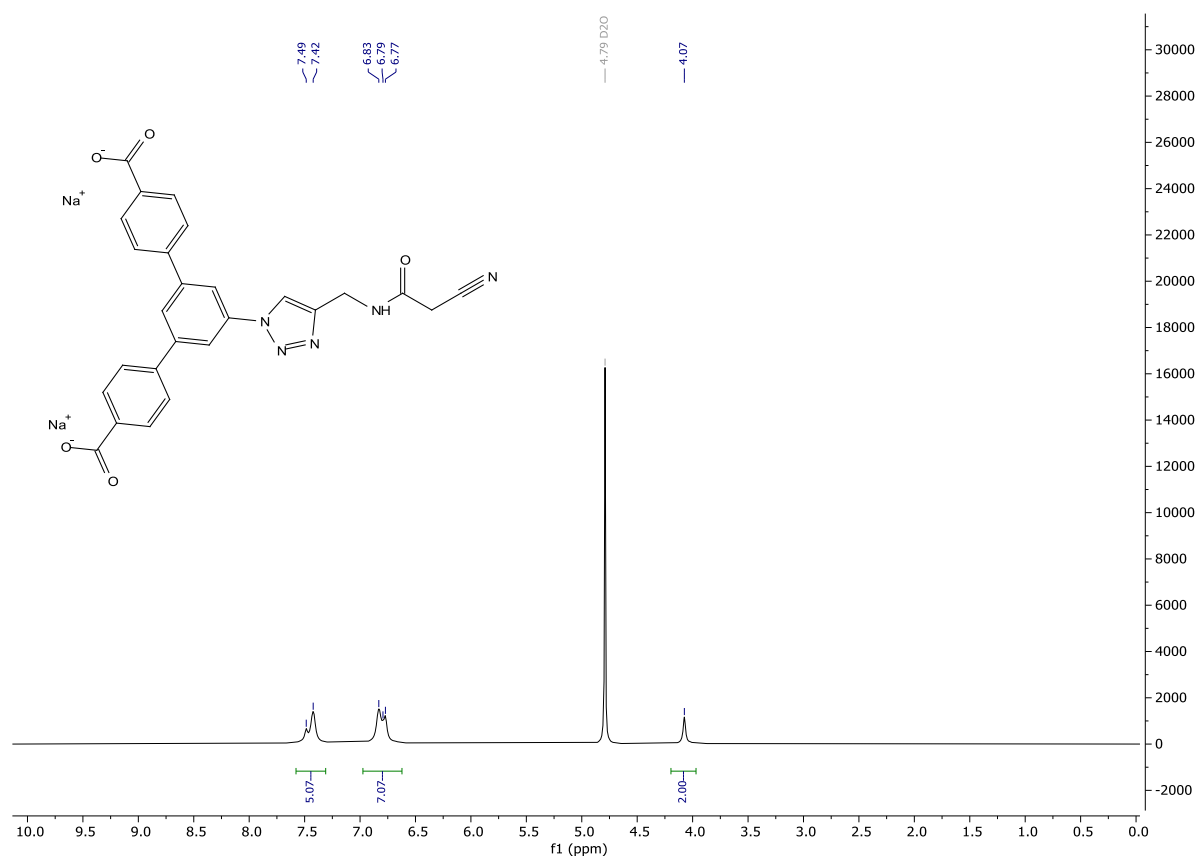

<sup>13</sup>C-NMR spectrum of **e**

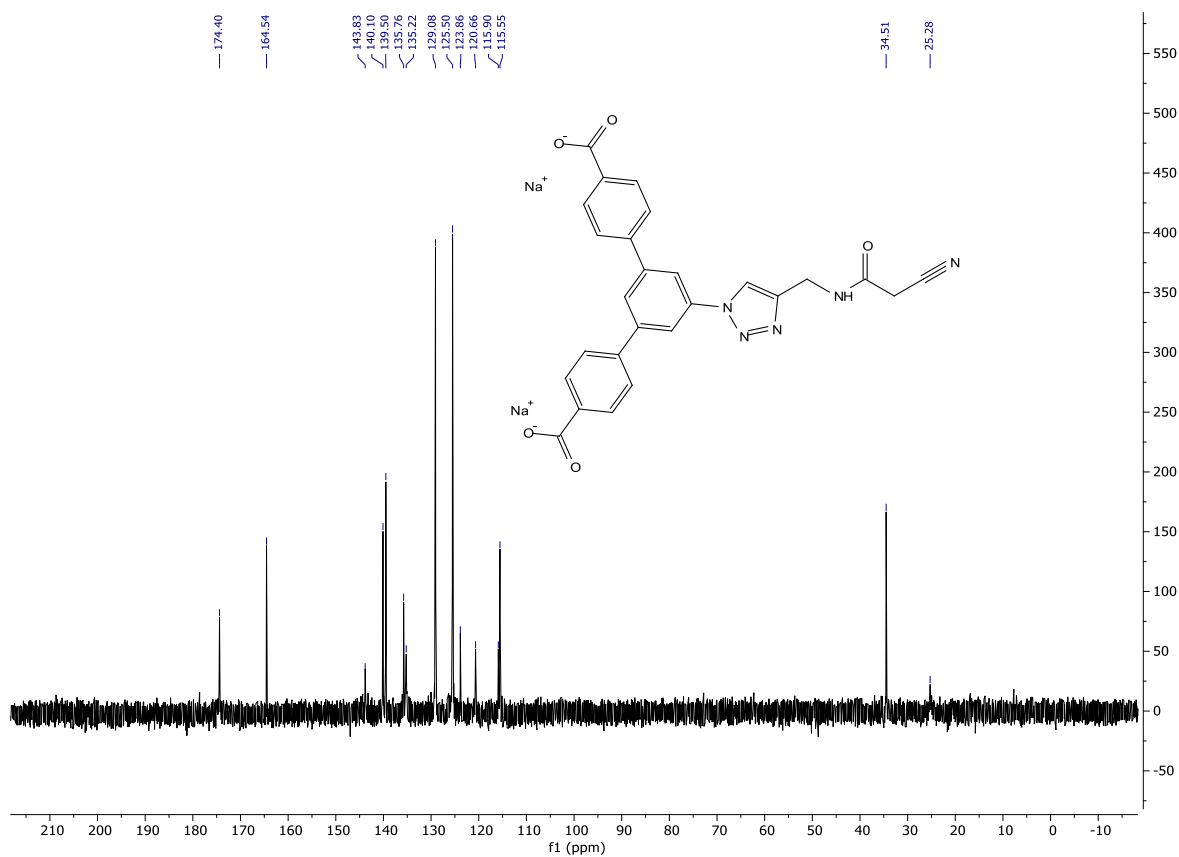

Low concentration <sup>1</sup>H-NMR spectrum of **1e** in DMSO-d<sub>6</sub> with AcOH as additive

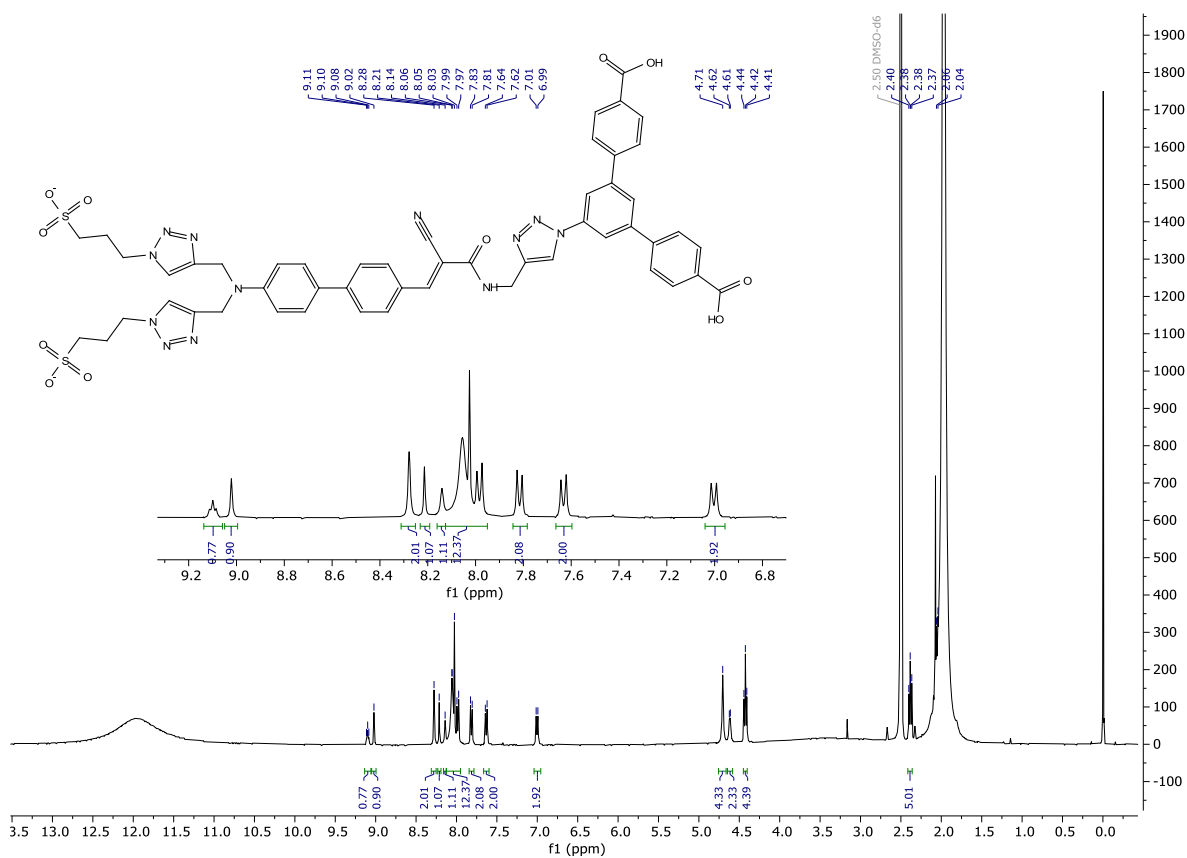

# High concentration $^1\text{H}$ -NMR spectrum of **1e** in DMSO- $d_6$ with AcOH as additive

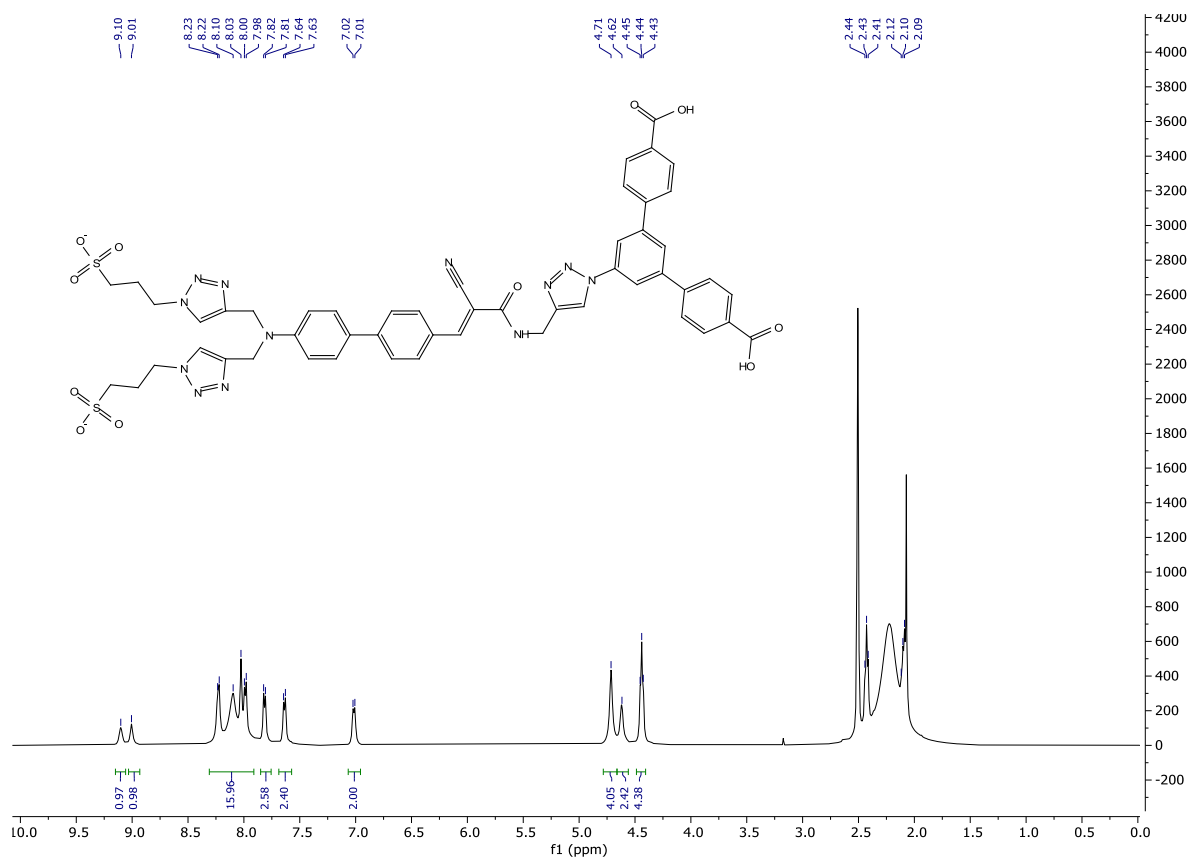

## NOESY spectrum of **1e**

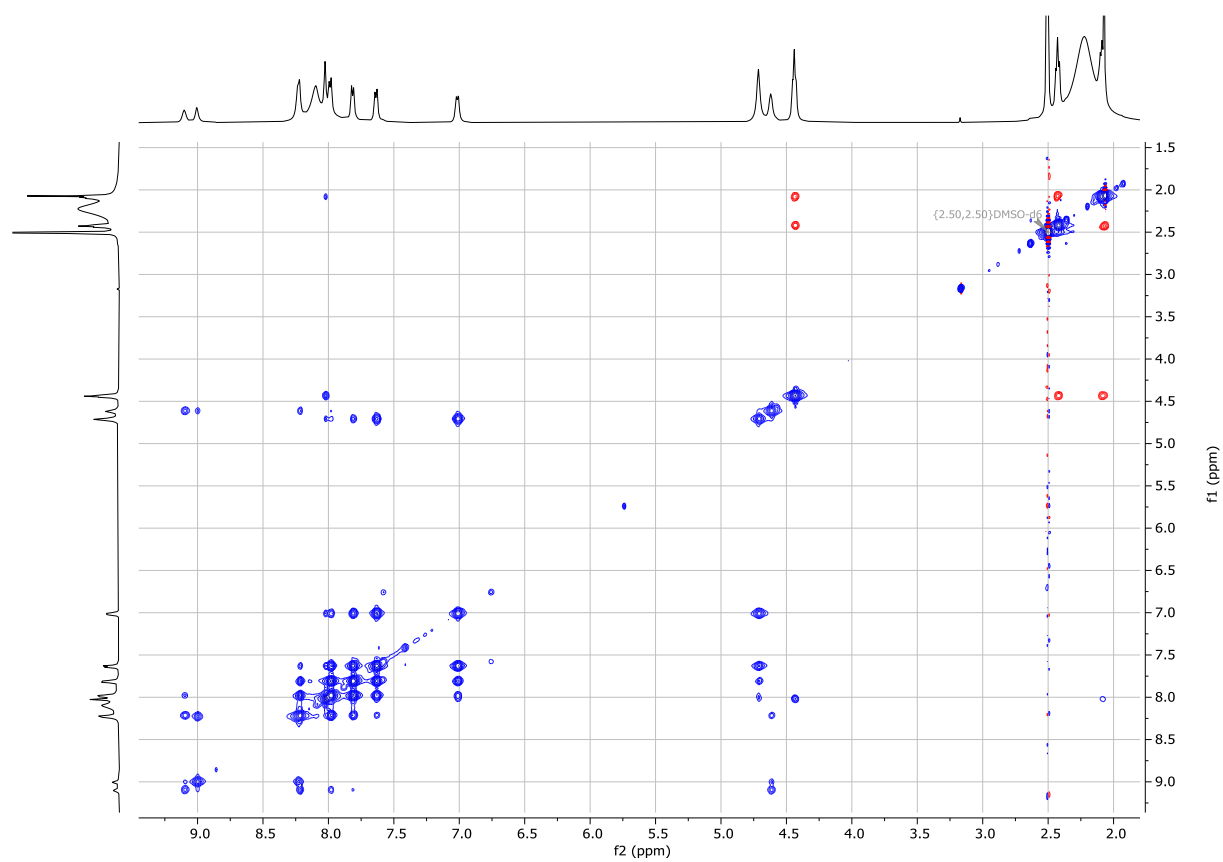

HMQC spectrum of **1e**

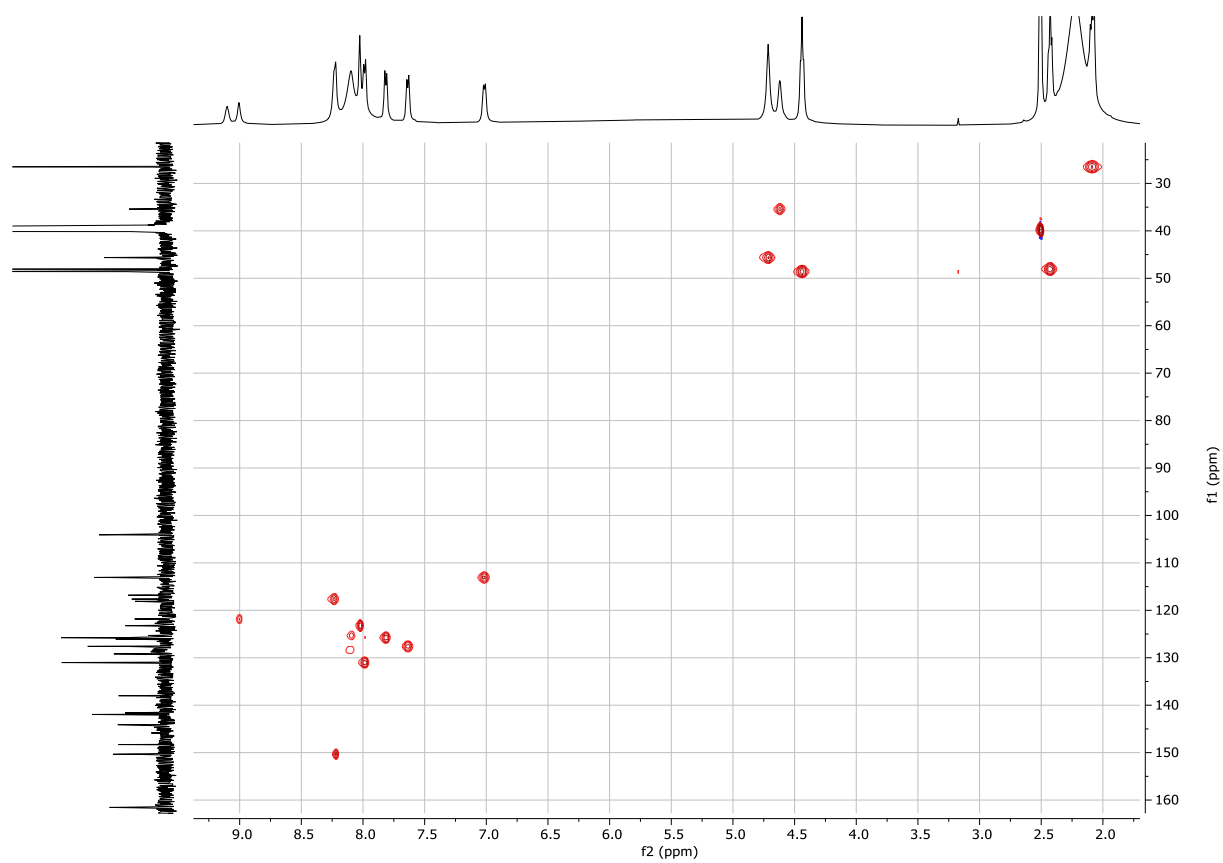

HMBC spectrum of **1e**

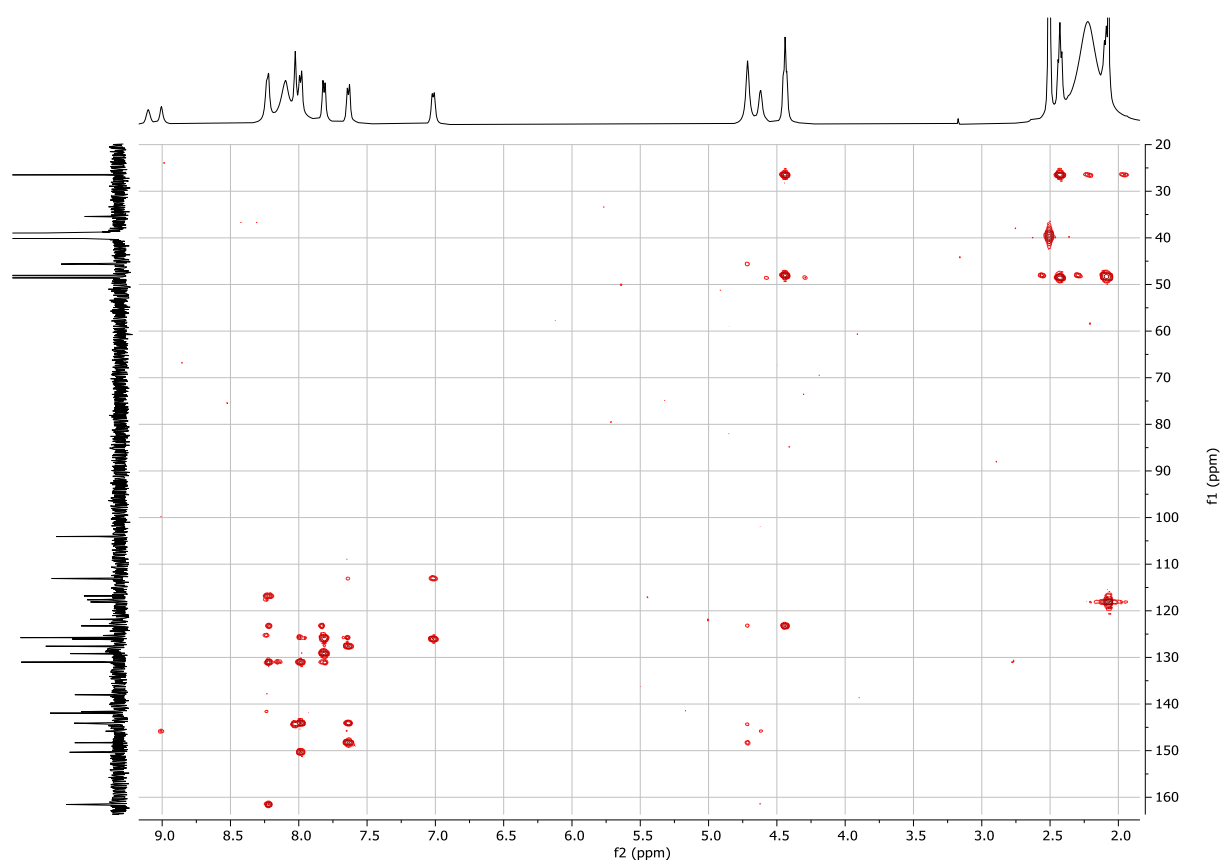

$^{13}\text{C}$ -NMR spectrum of **1e**

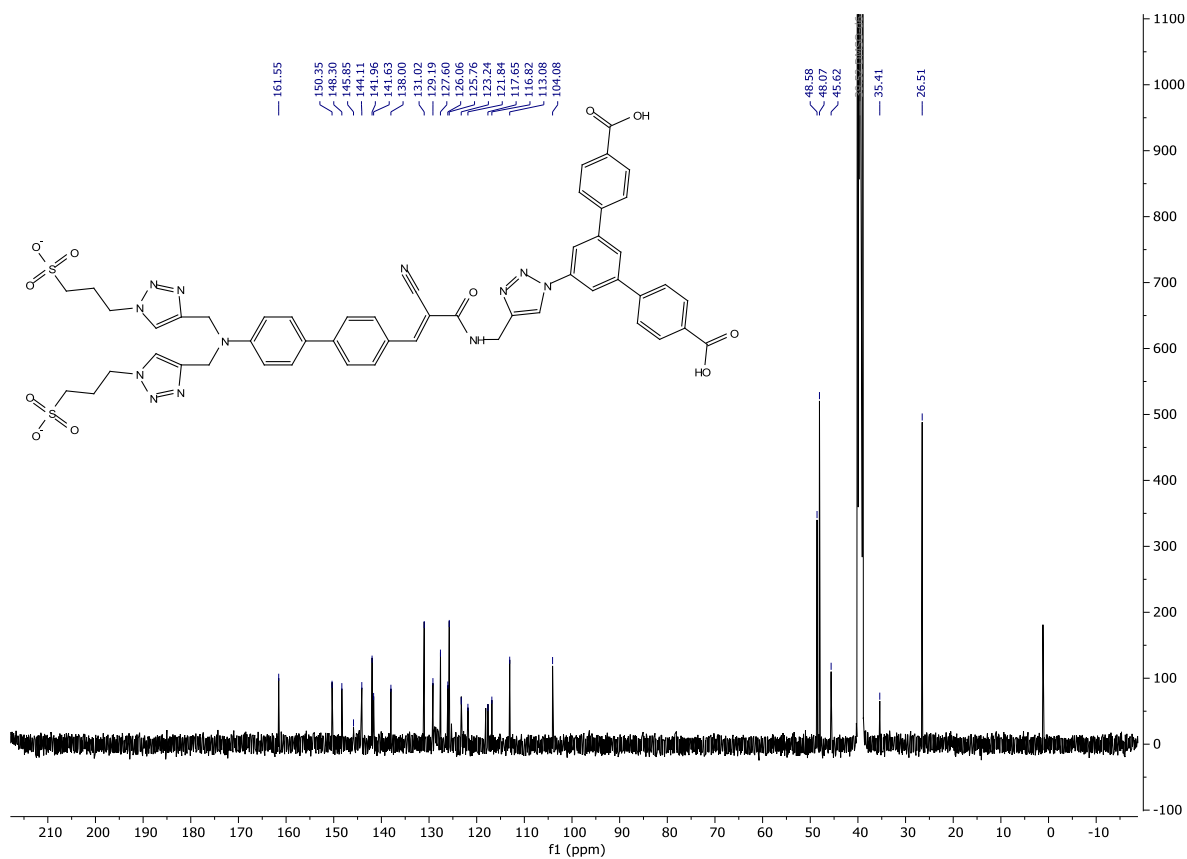

$^1\text{H}$ -NMR spectrum of **1e** in  $\text{CD}_3\text{CN}/\text{D}_2\text{O}$  1:1

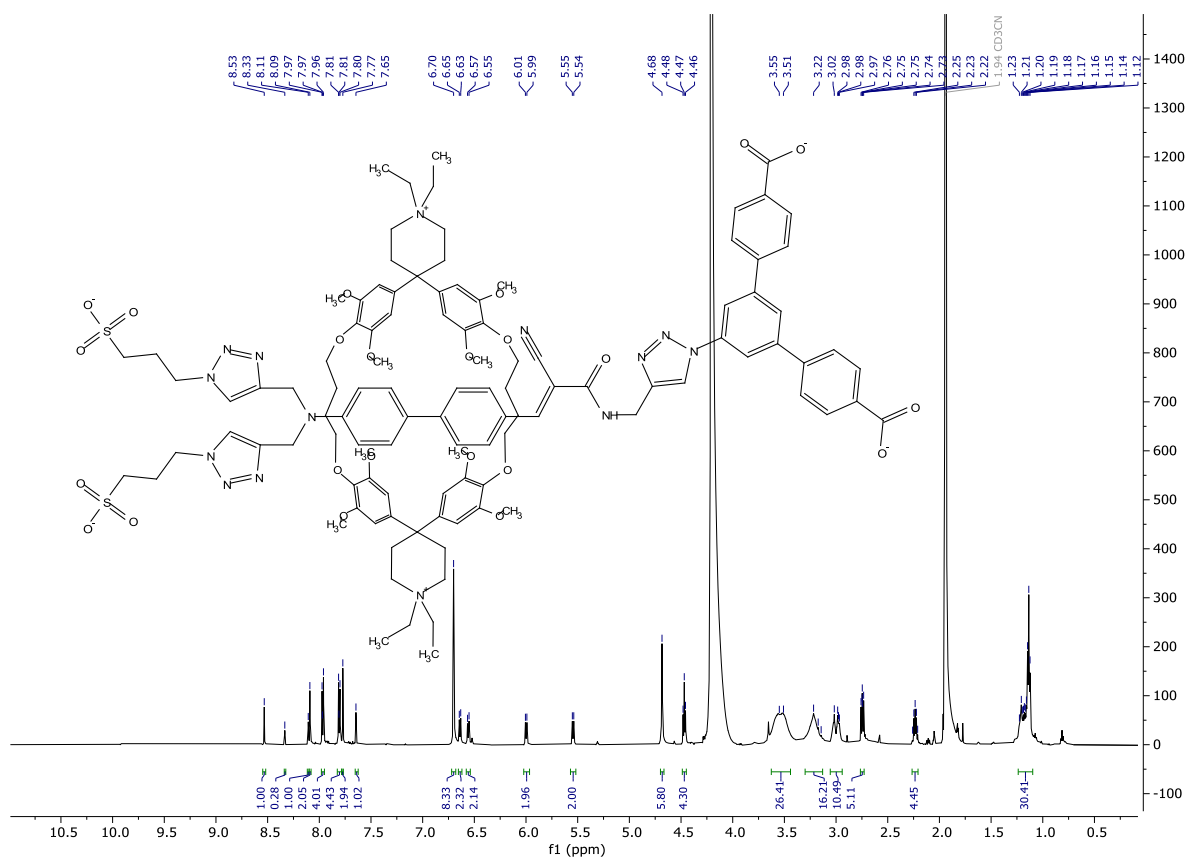

COSY spectrum of **1e**c2

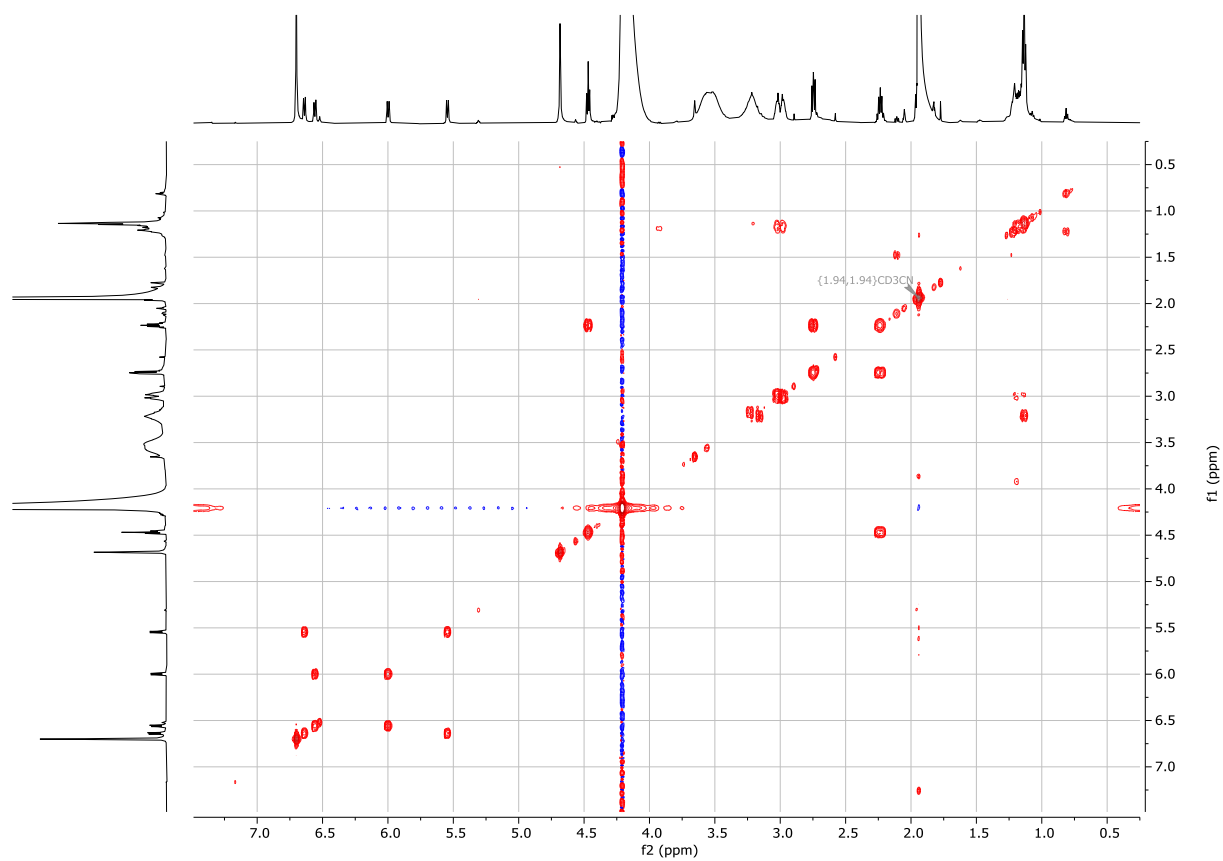

NOESY spectrum of **1e**c2

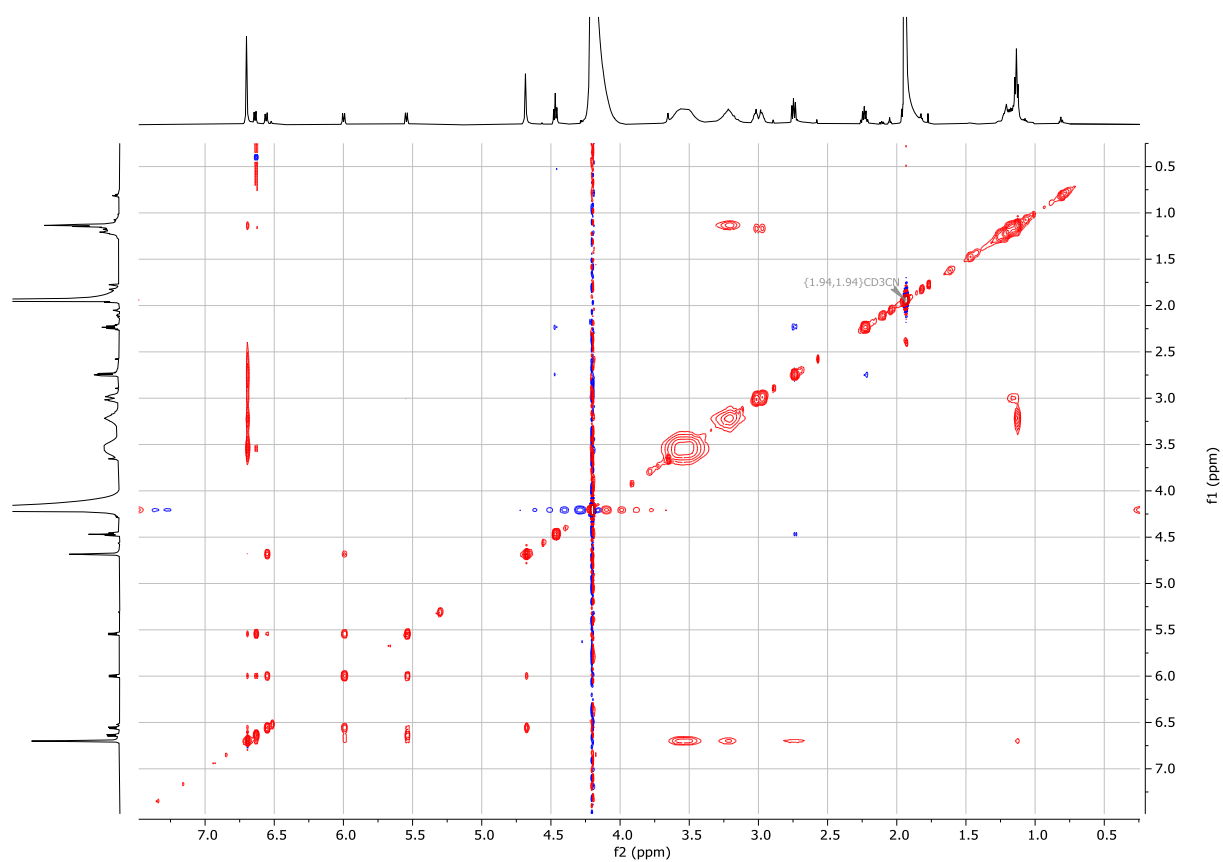

HMQC spectrum of **1e**c2

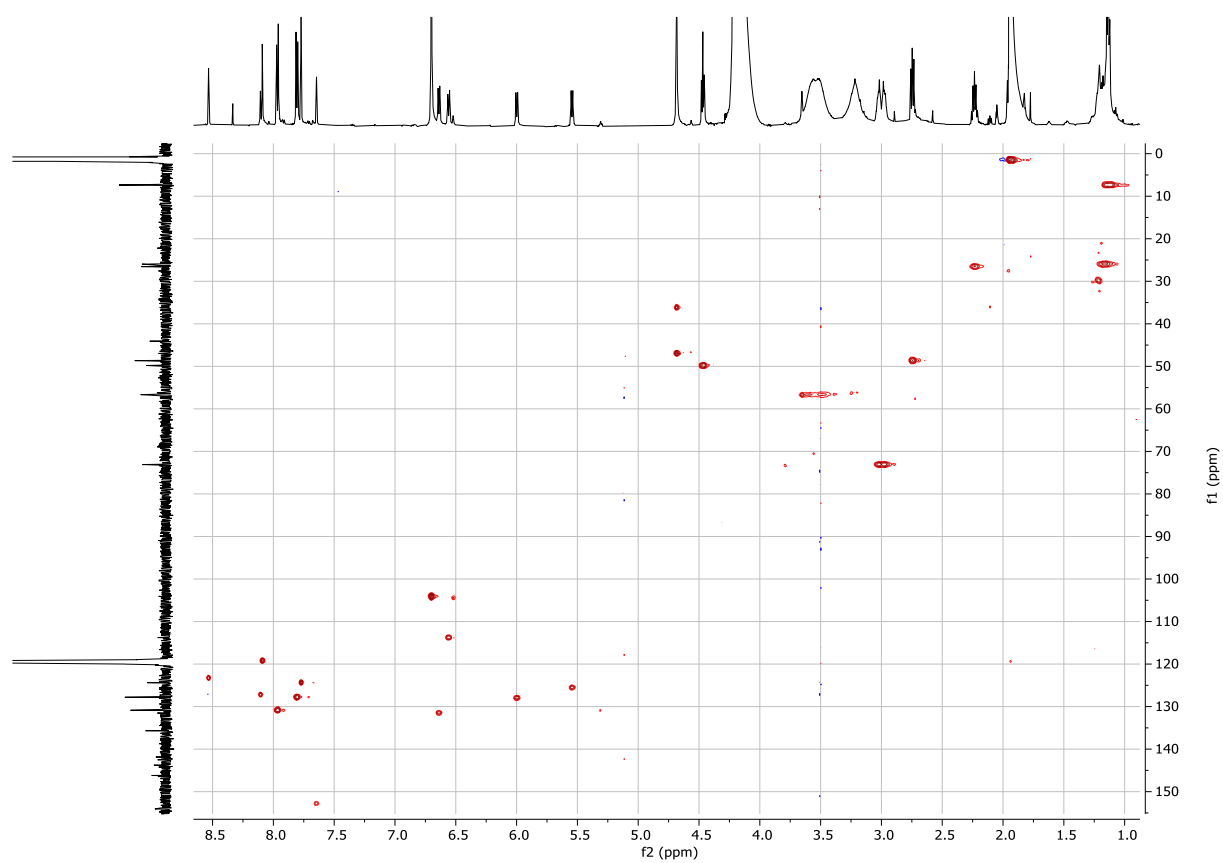

HMBC spectrum of **1e**c2

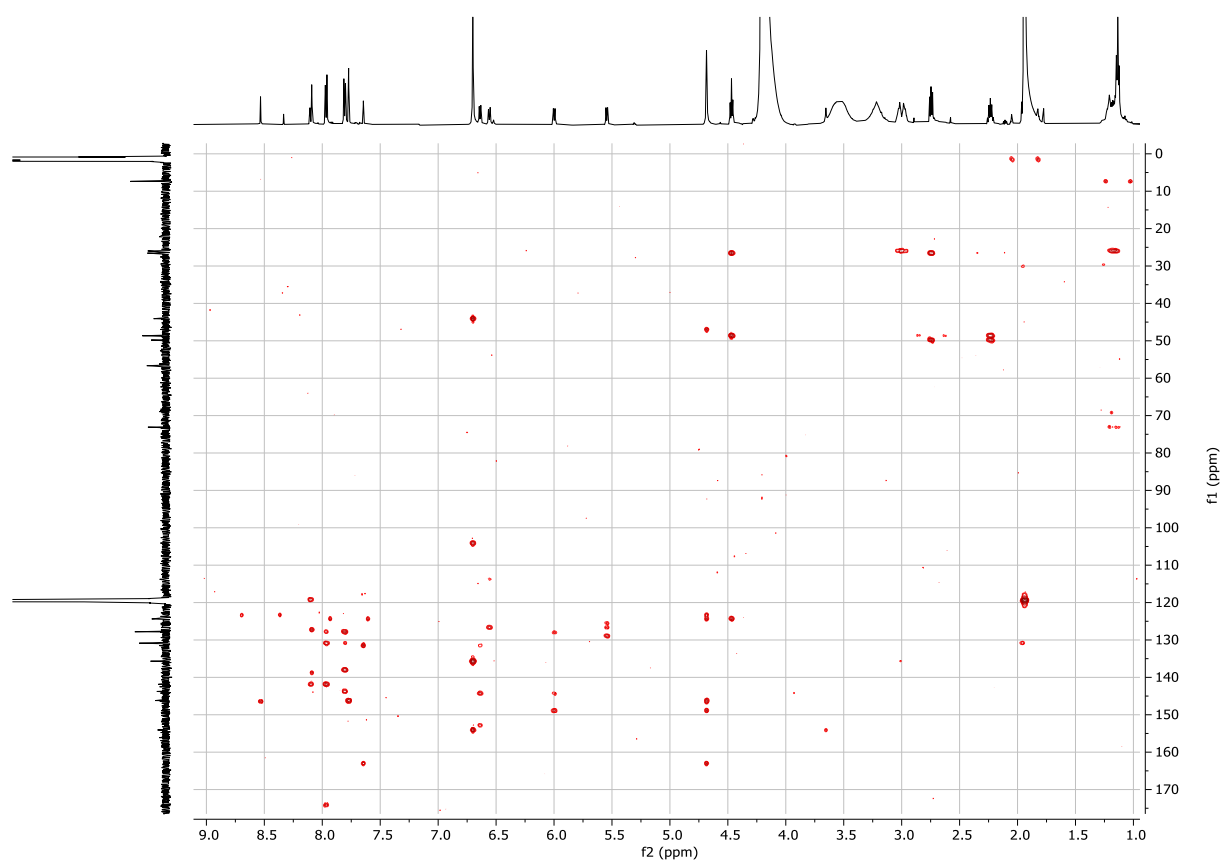

$^{13}\text{C}$ -NMR spectrum of **1ec2** (16384 scans)

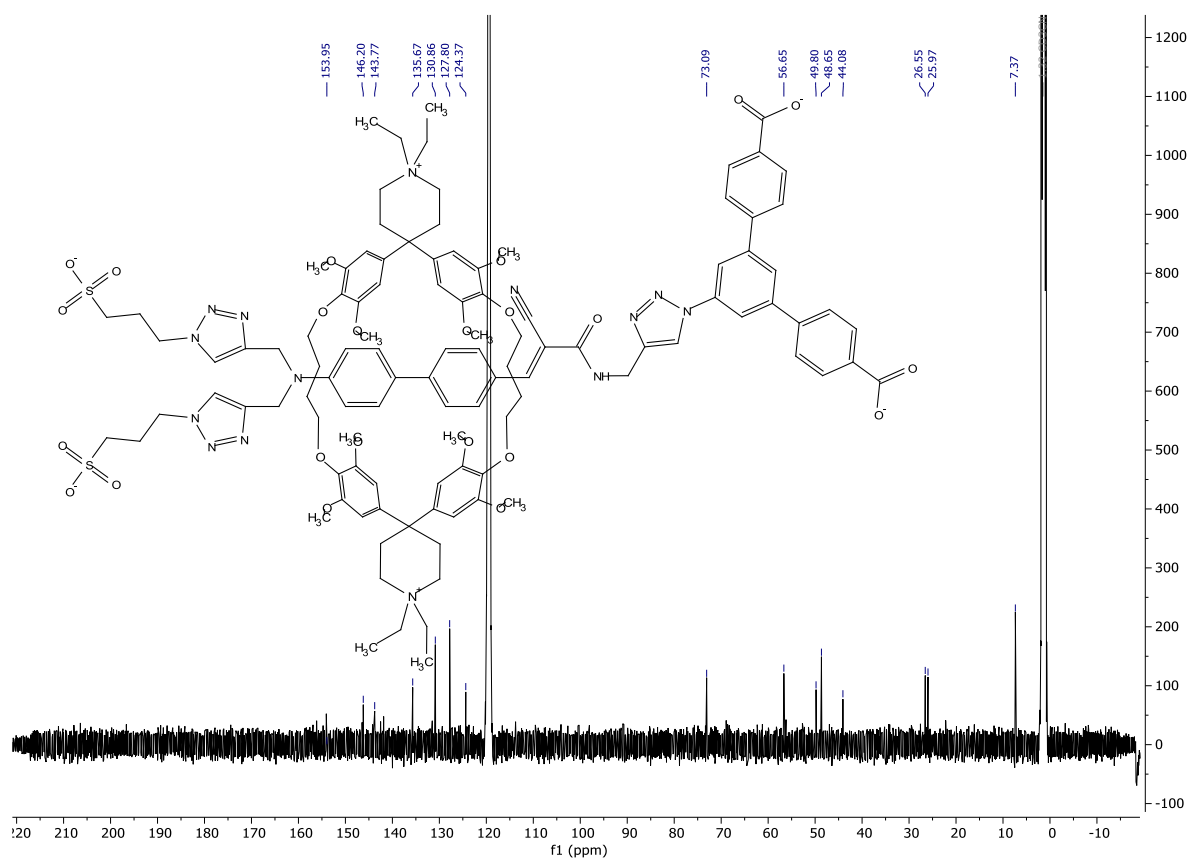

# HR-MS Spectra

## HR-MS Spectrum of 5

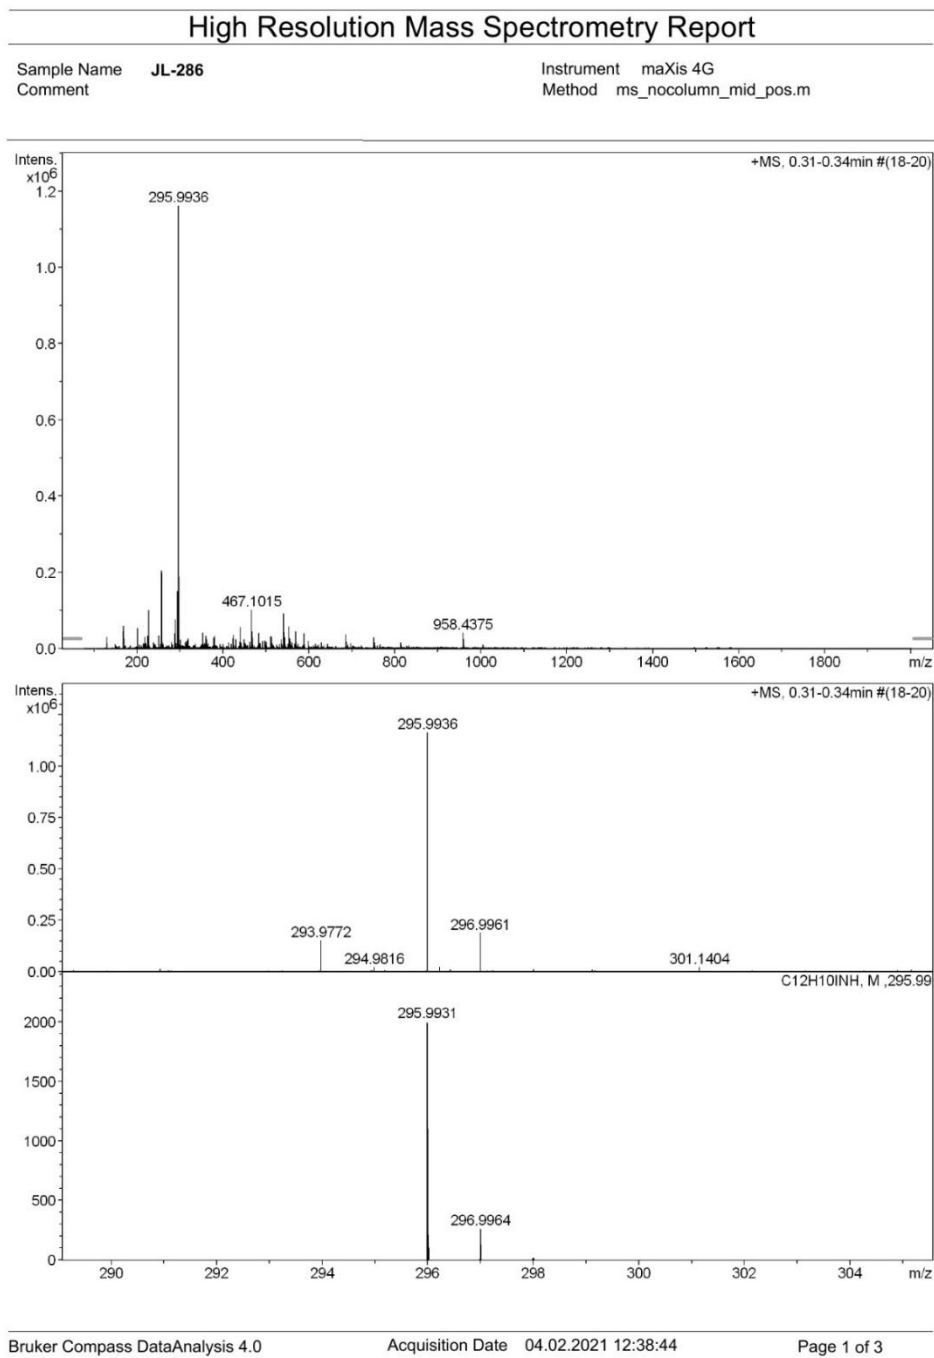

## High Resolution Mass Spectrometry Report

### Measured m/z vs. theoretical m/z

| Meas. m/z | # | Formula                                        | Score  | m/z      | err [mDa] | err [ppm] | mSigma | rdb | e <sup>-</sup> Conf | z  |
|-----------|---|------------------------------------------------|--------|----------|-----------|-----------|--------|-----|---------------------|----|
| 295.9936  | 1 | C <sub>12</sub> H <sub>11</sub> I <sub>N</sub> | 100.00 | 295.9931 | -0.6      | -1.9      | 16.1   | 7.5 | even                | 1+ |

### Mass list

| #  | m/z      | I %   | I       |
|----|----------|-------|---------|
| 1  | 130.0656 | 2.6   | 30019   |
| 2  | 131.0727 | 1.2   | 14358   |
| 3  | 168.0807 | 3.9   | 45548   |
| 4  | 169.0883 | 5.1   | 59307   |
| 5  | 170.0955 | 2.3   | 26306   |
| 6  | 201.1094 | 4.6   | 52950   |
| 7  | 214.9170 | 1.2   | 13936   |
| 8  | 217.1043 | 1.0   | 11349   |
| 9  | 218.9535 | 2.7   | 30893   |
| 10 | 220.9341 | 1.2   | 14412   |
| 11 | 224.9926 | 2.8   | 32453   |
| 12 | 226.9512 | 8.6   | 99729   |
| 13 | 238.8838 | 1.3   | 15609   |
| 14 | 239.1612 | 1.1   | 12243   |
| 15 | 250.9919 | 2.9   | 33418   |
| 16 | 255.1560 | 1.0   | 12183   |
| 17 | 256.9694 | 17.6  | 204577  |
| 18 | 257.0626 | 1.0   | 11532   |
| 19 | 257.9769 | 17.0  | 197091  |
| 20 | 258.9801 | 1.4   | 16537   |
| 21 | 281.0476 | 1.4   | 15935   |
| 22 | 288.2891 | 3.3   | 38568   |
| 23 | 288.9216 | 6.5   | 75739   |
| 24 | 290.9248 | 1.2   | 13733   |
| 25 | 293.9772 | 13.0  | 150572  |
| 26 | 294.9816 | 1.8   | 21069   |
| 27 | 295.9936 | 100.0 | 1161490 |
| 28 | 296.2190 | 2.0   | 23569   |
| 29 | 296.9961 | 16.1  | 187403  |
| 30 | 301.1404 | 1.9   | 22246   |
| 31 | 312.8879 | 1.4   | 16247   |
| 32 | 316.3204 | 1.5   | 16980   |
| 33 | 317.2443 | 1.7   | 19955   |
| 34 | 319.2600 | 2.2   | 25714   |
| 35 | 335.1668 | 1.0   | 11577   |
| 36 | 350.8917 | 1.0   | 11593   |
| 37 | 353.2656 | 3.5   | 41218   |
| 38 | 356.9085 | 1.2   | 13780   |
| 39 | 360.3229 | 2.8   | 33075   |
| 40 | 362.9257 | 2.0   | 23436   |
| 41 | 365.1055 | 1.1   | 12381   |
| 42 | 379.1453 | 2.4   | 27538   |
| 43 | 379.1933 | 1.5   | 17855   |
| 44 | 381.1006 | 1.2   | 14363   |
| 45 | 381.2969 | 2.8   | 32969   |
| 46 | 413.2654 | 1.4   | 15695   |
| 47 | 423.2194 | 2.3   | 26302   |
| 48 | 424.8962 | 3.0   | 35301   |
| 49 | 430.9132 | 2.0   | 23505   |
| 50 | 439.1242 | 1.5   | 17398   |
| 51 | 441.2969 | 4.8   | 56023   |
| 52 | 442.3002 | 1.3   | 15231   |
| 53 | 443.3334 | 1.0   | 12049   |
| 54 | 448.8628 | 2.0   | 23223   |
| 55 | 450.8597 | 1.2   | 13446   |
| 56 | 463.0659 | 1.5   | 17075   |
| 57 | 467.1015 | 8.7   | 101481  |
| 58 | 467.2445 | 2.8   | 32717   |
| 59 | 468.1020 | 3.8   | 44061   |
| 60 | 469.0996 | 2.4   | 28271   |
| 61 | 483.2082 | 3.4   | 39521   |
| 62 | 484.2112 | 1.2   | 13951   |

## High Resolution Mass Spectrometry Report

| #   | m/z      | I % | I     |
|-----|----------|-----|-------|
| 63  | 486.8668 | 1.2 | 13517 |
| 64  | 487.3598 | 1.0 | 11465 |
| 65  | 492.8839 | 1.6 | 18476 |
| 66  | 497.3955 | 1.7 | 19418 |
| 67  | 501.0217 | 1.6 | 18027 |
| 68  | 511.2718 | 2.8 | 32049 |
| 69  | 513.1430 | 2.6 | 30270 |
| 70  | 513.3695 | 1.2 | 14415 |
| 71  | 514.1441 | 1.2 | 14251 |
| 72  | 536.1645 | 2.0 | 23260 |
| 73  | 537.1651 | 1.0 | 11465 |
| 74  | 541.1201 | 7.8 | 90884 |
| 75  | 542.1208 | 3.8 | 43713 |
| 76  | 543.1184 | 2.5 | 29362 |
| 77  | 550.9466 | 1.0 | 11932 |
| 78  | 553.3888 | 1.8 | 21451 |
| 79  | 553.4583 | 5.0 | 57665 |
| 80  | 554.4614 | 1.9 | 22636 |
| 81  | 554.8537 | 1.0 | 11350 |
| 82  | 555.2980 | 2.3 | 27044 |
| 83  | 557.0939 | 1.6 | 19114 |
| 84  | 560.8708 | 1.3 | 15652 |
| 85  | 566.8876 | 1.0 | 11548 |
| 86  | 569.4323 | 3.8 | 44074 |
| 87  | 570.4355 | 1.5 | 16864 |
| 88  | 588.9028 | 3.3 | 38111 |
| 89  | 599.3240 | 1.6 | 18409 |
| 90  | 615.1385 | 1.0 | 11694 |
| 91  | 628.8585 | 1.3 | 15324 |
| 92  | 685.4340 | 3.1 | 36470 |
| 93  | 686.4373 | 1.5 | 17192 |
| 94  | 696.8454 | 1.2 | 13557 |
| 95  | 750.4062 | 2.5 | 28764 |
| 96  | 751.4093 | 1.2 | 13727 |
| 97  | 752.4057 | 1.3 | 14653 |
| 98  | 813.5561 | 1.4 | 15731 |
| 99  | 958.4375 | 3.6 | 41248 |
| 100 | 959.4404 | 2.1 | 24087 |

### Acquisition Parameter

|                   |                              |                |                                       |                |              |           |
|-------------------|------------------------------|----------------|---------------------------------------|----------------|--------------|-----------|
| <b>General</b>    | Fore Vacuum                  | 2.40e+000 mBar | High Vacuum                           | 1.15e-007 mBar | Source Type  | ESI       |
|                   | Scan Begin                   | 75 m/z         | Scan End                              | 2000 m/z       | Ion Polarity | Positive  |
| <b>Source</b>     | Set Nebulizer                | 2.0 Bar        | Set Capillary                         | 4500 V         | Set Dry Gas  | 8.0 l/min |
|                   | Set Dry Heater               | 200 °C         | Set End Plate Offset                  | -500 V         |              |           |
| <b>Quadrupole</b> | Set Ion Energy ( MS only )   | 4.0 eV         |                                       |                |              |           |
| <b>Coll. Cell</b> | Collision Energy             | 8.0 eV         | Set Collision Cell RF                 | 600.0 Vpp      | 100.0 Vpp    |           |
| <b>Ion Cooler</b> | Set Ion Cooler Transfer Time | 75.0 µs        | Set Ion Cooler Pre Pulse Storage Time | 10.0 µs        |              |           |

## High Resolution Mass Spectrometry Report

Sample Name **Laurent Jucker / JL-215P**  
Comment 5 ug/mL in MeOH, analyzed in MeCN

Instrument maXis 4G  
Method 33 Direct\_neg\_higher.m

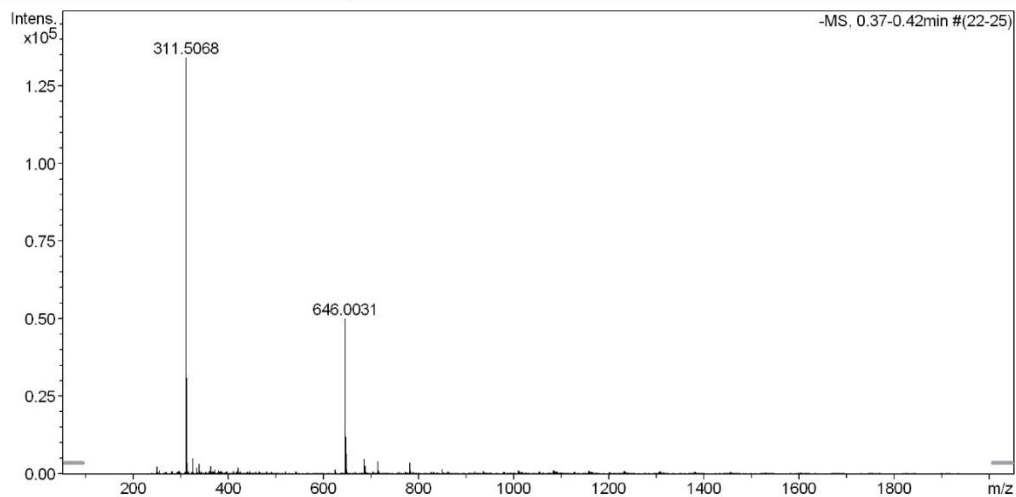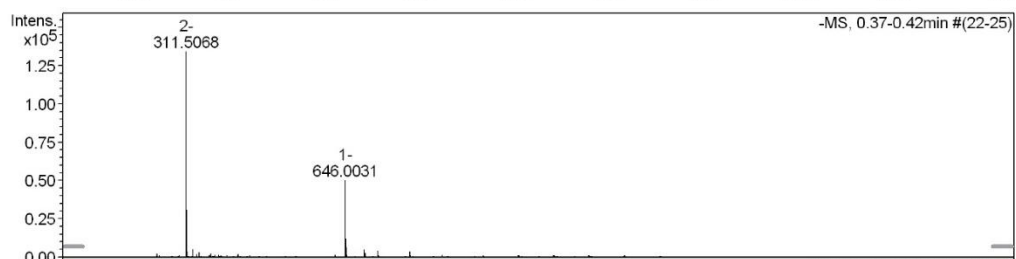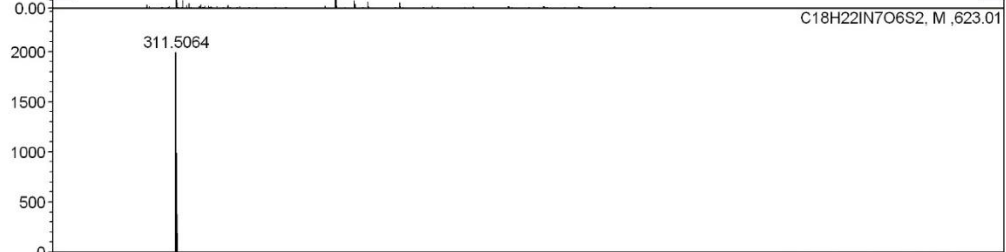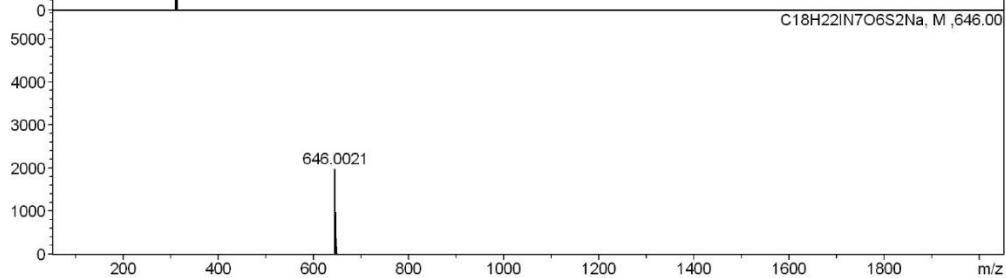

# High Resolution Mass Spectrometry Report

## Measured m/z vs. theoretical m/z

| Meas. m/z | # | Formula                    | Score  | m/z      | err [mDa] | err [ppm] | mSigma | rdb  | e <sup>-</sup> Conf | z  |
|-----------|---|----------------------------|--------|----------|-----------|-----------|--------|------|---------------------|----|
| 311.5068  | 1 | C 18 H 22 I N 7 O 6 S 2    | 100.00 | 311.5064 | -0.4      | -1.2      | 13.3   | 11.0 | even                | 2- |
| 646.0031  | 1 | C 18 H 22 I N 7 Na O 6 S 2 | 100.00 | 646.0021 | -1.0      | -1.6      | 1.4    | 10.5 | even                | 1- |

## Mass list

| #  | m/z      | I %   | I      |
|----|----------|-------|--------|
| 1  | 248.9612 | 0.4   | 500    |
| 2  | 250.5046 | 1.6   | 2167   |
| 3  | 255.2325 | 0.8   | 1082   |
| 4  | 281.2489 | 0.4   | 585    |
| 5  | 283.2636 | 0.6   | 744    |
| 6  | 294.9532 | 0.4   | 583    |
| 7  | 297.0472 | 0.8   | 1015   |
| 8  | 297.1536 | 0.6   | 831    |
| 9  | 311.1684 | 2.5   | 3403   |
| 10 | 311.5068 | 100.0 | 134030 |
| 11 | 312.0079 | 23.0  | 30802  |
| 12 | 312.1712 | 0.6   | 791    |
| 13 | 312.5057 | 10.4  | 13897  |
| 14 | 313.0067 | 2.6   | 3487   |
| 15 | 313.0782 | 1.5   | 1975   |
| 16 | 313.5060 | 0.5   | 658    |
| 17 | 316.9484 | 0.4   | 561    |
| 18 | 323.2201 | 0.4   | 504    |
| 19 | 325.1841 | 3.7   | 4931   |
| 20 | 326.1874 | 0.7   | 899    |
| 21 | 334.0752 | 1.4   | 1881   |
| 22 | 339.1995 | 2.3   | 3111   |
| 23 | 340.2035 | 0.6   | 739    |
| 24 | 343.4750 | 0.5   | 653    |
| 25 | 360.4560 | 0.6   | 836    |
| 26 | 361.4549 | 0.5   | 622    |
| 27 | 362.9407 | 1.7   | 2340   |
| 28 | 367.3583 | 0.5   | 680    |
| 29 | 369.3006 | 0.4   | 531    |
| 30 | 371.0656 | 0.9   | 1244   |
| 31 | 380.1171 | 0.8   | 1126   |
| 32 | 381.3728 | 0.4   | 521    |
| 33 | 383.3162 | 0.4   | 600    |
| 34 | 384.9350 | 0.6   | 830    |
| 35 | 387.0965 | 0.5   | 611    |
| 36 | 396.8900 | 0.6   | 841    |
| 37 | 397.3324 | 0.5   | 706    |
| 38 | 411.3467 | 0.5   | 724    |
| 39 | 419.9749 | 0.7   | 981    |
| 40 | 420.9833 | 1.4   | 1830   |
| 41 | 425.3632 | 0.5   | 610    |
| 42 | 439.3790 | 0.4   | 505    |
| 43 | 445.0857 | 0.7   | 962    |
| 44 | 465.3043 | 0.5   | 684    |
| 45 | 480.5085 | 0.5   | 699    |
| 46 | 520.9093 | 0.4   | 599    |
| 47 | 541.5101 | 0.4   | 568    |
| 48 | 542.9858 | 0.4   | 488    |
| 49 | 624.0205 | 1.0   | 1286   |
| 50 | 646.0031 | 37.2  | 49920  |
| 51 | 647.0054 | 8.9   | 11891  |
| 52 | 648.0001 | 4.8   | 6373   |
| 53 | 649.0019 | 0.9   | 1269   |
| 54 | 685.9427 | 3.5   | 4652   |
| 55 | 686.9455 | 0.9   | 1141   |
| 56 | 687.9413 | 1.9   | 2483   |
| 57 | 688.9437 | 0.5   | 678    |
| 58 | 703.9619 | 0.5   | 688    |
| 59 | 713.9910 | 3.0   | 3972   |
| 60 | 714.9935 | 0.8   | 1054   |
| 61 | 715.9889 | 0.4   | 502    |

---

## High Resolution Mass Spectrometry Report

---

| #   | m/z       | I % | I    |
|-----|-----------|-----|------|
| 62  | 771.9521  | 0.4 | 520  |
| 63  | 781.9802  | 2.6 | 3431 |
| 64  | 782.9831  | 0.7 | 883  |
| 65  | 787.1670  | 0.4 | 505  |
| 66  | 849.9681  | 1.0 | 1351 |
| 67  | 861.1896  | 0.4 | 565  |
| 68  | 917.9579  | 0.5 | 659  |
| 69  | 935.2079  | 0.6 | 855  |
| 70  | 936.2105  | 0.5 | 644  |
| 71  | 937.2085  | 0.5 | 681  |
| 72  | 1009.2333 | 0.7 | 905  |
| 73  | 1010.2325 | 0.7 | 880  |
| 74  | 1011.2312 | 0.6 | 850  |
| 75  | 1012.2288 | 0.5 | 612  |
| 76  | 1016.6873 | 0.4 | 497  |
| 77  | 1017.1883 | 0.4 | 490  |
| 78  | 1053.1992 | 0.4 | 493  |
| 79  | 1054.1956 | 0.4 | 563  |
| 80  | 1083.2548 | 0.8 | 1028 |
| 81  | 1084.2505 | 0.7 | 991  |
| 82  | 1085.2518 | 0.7 | 1005 |
| 83  | 1086.2524 | 0.5 | 641  |
| 84  | 1090.2157 | 0.4 | 521  |
| 85  | 1090.7117 | 0.4 | 552  |
| 86  | 1091.2080 | 0.4 | 542  |
| 87  | 1127.7256 | 0.4 | 532  |
| 88  | 1128.2228 | 0.4 | 520  |
| 89  | 1157.2744 | 0.6 | 821  |
| 90  | 1158.2749 | 0.7 | 944  |
| 91  | 1159.2756 | 0.7 | 940  |
| 92  | 1160.2741 | 0.5 | 703  |
| 93  | 1164.2337 | 0.4 | 516  |
| 94  | 1231.2964 | 0.4 | 543  |
| 95  | 1232.2960 | 0.5 | 731  |
| 96  | 1233.2965 | 0.6 | 836  |
| 97  | 1234.2952 | 0.4 | 572  |
| 98  | 1306.3209 | 0.5 | 605  |
| 99  | 1307.3211 | 0.5 | 613  |
| 100 | 1308.3187 | 0.4 | 499  |

---

### Acquisition Parameter

|             |            |                       |           |                            |           |
|-------------|------------|-----------------------|-----------|----------------------------|-----------|
| Source Type | ESI        | Ion Polarity          | Negative  | Set Nebulizer              | 0.4 Bar   |
| Focus       | Not active | Set Capillary         | 4500 V    | Set Dry Heater             | 180 °C    |
| Scan Begin  | 100 m/z    | Set End Plate Offset  | -500 V    | Set Dry Gas                | 4.0 l/min |
| Scan End    | 2000 m/z   | Set Collision Cell RF | 100.0 Vpp | Set Ion Energy ( MS only ) | -8.0 eV   |

## High Resolution Mass Spectrometry Report

|             |                                              |            |                     |
|-------------|----------------------------------------------|------------|---------------------|
| Sample Name | Laurent Jucker / JL-225P                     | Instrument | maXis 4G            |
| Comment     | 10 ug/mL in MeOH, analyzed in MeOH+0.1%HCOOH | Method     | 22 Direct_pos_mid.m |

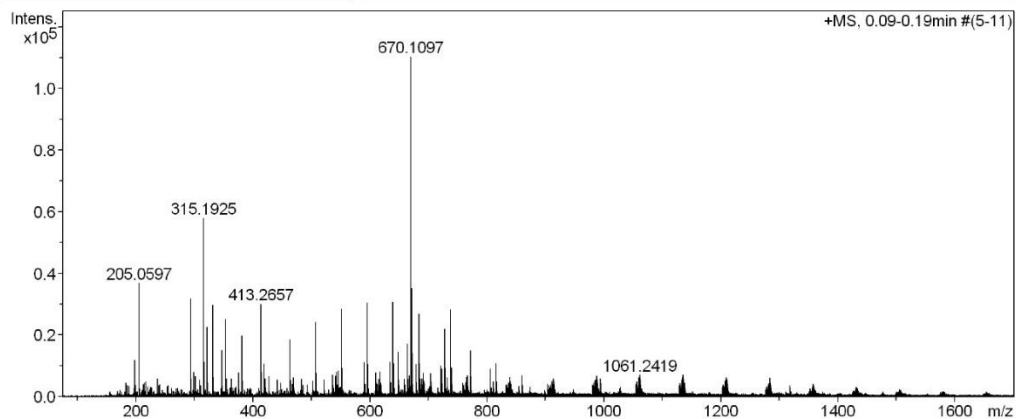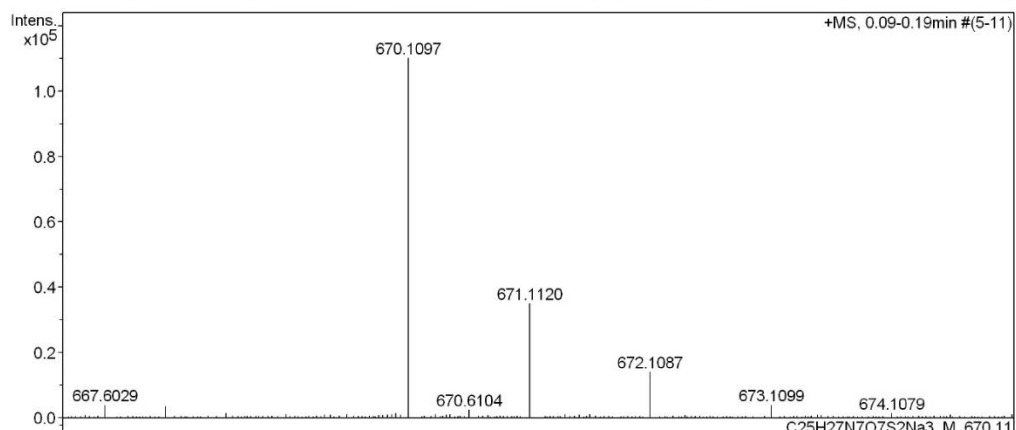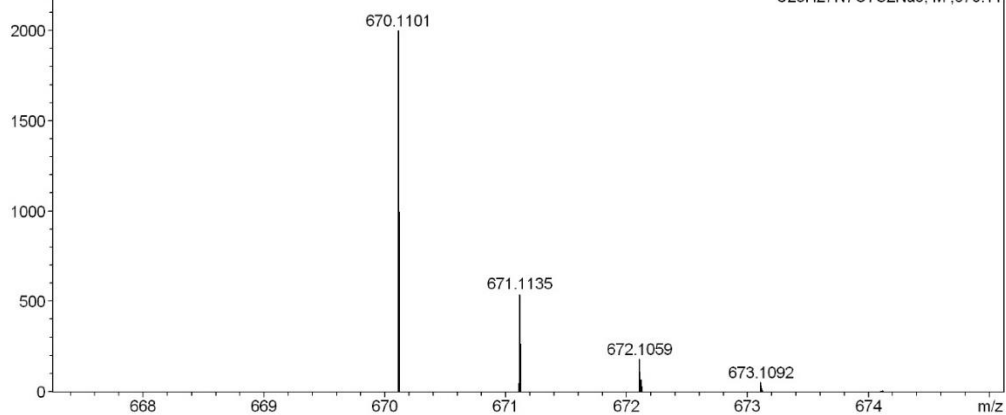

## High Resolution Mass Spectrometry Report

### Measured m/z vs. theoretical m/z

| Meas. m/z | # | Formula                    | Score  | m/z      | err [mDa] | err [ppm] | mSigma | rdb  | e <sup>-</sup> Conf | z  |
|-----------|---|----------------------------|--------|----------|-----------|-----------|--------|------|---------------------|----|
| 670.1097  | 1 | C 25 H 27 N 7 Na 3 O 7 S 2 | 100.00 | 670.1101 | 0.4       | 0.7       | 12.7   | 14.5 | even                | 1+ |

### Mass list

| #  | m/z      | I %   | I      |
|----|----------|-------|--------|
| 1  | 198.0908 | 10.7  | 11831  |
| 2  | 205.0597 | 33.3  | 36655  |
| 3  | 237.1466 | 5.3   | 5814   |
| 4  | 293.2445 | 28.8  | 31751  |
| 5  | 294.2477 | 5.3   | 5874   |
| 6  | 299.1607 | 7.2   | 7909   |
| 7  | 301.1403 | 5.9   | 6511   |
| 8  | 309.2045 | 4.8   | 5337   |
| 9  | 315.1925 | 52.5  | 57813  |
| 10 | 316.1955 | 10.2  | 11225  |
| 11 | 321.2756 | 20.5  | 22612  |
| 12 | 331.1872 | 26.9  | 29570  |
| 13 | 331.2234 | 11.9  | 13081  |
| 14 | 332.1908 | 5.8   | 6365   |
| 15 | 347.1821 | 13.7  | 15036  |
| 16 | 353.2657 | 22.7  | 25024  |
| 17 | 354.2690 | 5.3   | 5882   |
| 18 | 363.2133 | 5.3   | 5815   |
| 19 | 375.2495 | 7.0   | 7743   |
| 20 | 381.2969 | 17.9  | 19670  |
| 21 | 413.2657 | 27.2  | 29937  |
| 22 | 414.2692 | 7.3   | 8086   |
| 23 | 419.2755 | 9.6   | 10542  |
| 24 | 421.0883 | 5.3   | 5871   |
| 25 | 427.2842 | 5.8   | 6411   |
| 26 | 441.2968 | 4.8   | 5306   |
| 27 | 463.3022 | 16.8  | 18511  |
| 28 | 464.3058 | 4.8   | 5243   |
| 29 | 469.0809 | 5.6   | 6136   |
| 30 | 483.3111 | 5.1   | 5663   |
| 31 | 507.3285 | 21.9  | 24127  |
| 32 | 508.3315 | 6.9   | 7590   |
| 33 | 521.3806 | 4.9   | 5347   |
| 34 | 536.1650 | 6.3   | 6967   |
| 35 | 541.1199 | 6.0   | 6633   |
| 36 | 543.1005 | 7.4   | 8106   |
| 37 | 546.3991 | 7.5   | 8297   |
| 38 | 551.3548 | 25.8  | 28428  |
| 39 | 552.3581 | 8.4   | 9212   |
| 40 | 590.4255 | 10.0  | 11065  |
| 41 | 595.3808 | 27.6  | 30399  |
| 42 | 596.3846 | 9.4   | 10340  |
| 43 | 610.1835 | 7.0   | 7670   |
| 44 | 615.1391 | 5.1   | 5645   |
| 45 | 617.1193 | 7.4   | 8100   |
| 46 | 634.4513 | 10.1  | 11165  |
| 47 | 639.4070 | 27.7  | 30512  |
| 48 | 640.4108 | 9.7   | 10725  |
| 49 | 648.1232 | 13.0  | 14351  |
| 50 | 649.1253 | 4.8   | 5326   |
| 51 | 659.1157 | 5.1   | 5610   |
| 52 | 664.0926 | 15.5  | 17050  |
| 53 | 665.0951 | 5.2   | 5750   |
| 54 | 667.1008 | 6.1   | 6722   |
| 55 | 670.1097 | 100.0 | 110120 |
| 56 | 671.1120 | 31.7  | 34930  |
| 57 | 672.1087 | 12.7  | 13970  |
| 58 | 678.4779 | 9.4   | 10377  |
| 59 | 683.4334 | 24.4  | 26843  |
| 60 | 684.2015 | 4.9   | 5397   |
| 61 | 684.4364 | 9.8   | 10761  |
| 62 | 685.4375 | 5.3   | 5871   |

---

## High Resolution Mass Spectrometry Report

---

| #   | m/z       | I %  | I     |
|-----|-----------|------|-------|
| 63  | 689.1573  | 5.3  | 5888  |
| 64  | 691.1395  | 6.9  | 7607  |
| 65  | 704.1039  | 6.7  | 7410  |
| 66  | 721.5763  | 9.0  | 9917  |
| 67  | 722.5037  | 8.1  | 8910  |
| 68  | 727.4590  | 19.9 | 21959 |
| 69  | 728.4628  | 8.3  | 9105  |
| 70  | 732.0793  | 5.5  | 6092  |
| 71  | 738.0965  | 25.6 | 28141 |
| 72  | 739.0990  | 8.4  | 9294  |
| 73  | 765.1578  | 5.8  | 6346  |
| 74  | 766.5303  | 6.2  | 6853  |
| 75  | 771.4848  | 13.5 | 14822 |
| 76  | 772.4886  | 5.8  | 6390  |
| 77  | 806.0833  | 8.2  | 9003  |
| 78  | 815.5108  | 9.7  | 10694 |
| 79  | 839.1779  | 5.7  | 6281  |
| 80  | 859.5376  | 6.1  | 6724  |
| 81  | 913.2010  | 5.3  | 5885  |
| 82  | 914.1975  | 4.6  | 5095  |
| 83  | 985.2311  | 4.7  | 5172  |
| 84  | 986.2331  | 4.8  | 5338  |
| 85  | 987.2216  | 6.0  | 6574  |
| 86  | 988.2179  | 5.0  | 5483  |
| 87  | 993.6683  | 5.2  | 5778  |
| 88  | 1059.2498 | 5.5  | 6077  |
| 89  | 1060.2490 | 5.6  | 6147  |
| 90  | 1061.2419 | 6.4  | 6996  |
| 91  | 1062.2379 | 5.1  | 5576  |
| 92  | 1133.2674 | 4.9  | 5408  |
| 93  | 1134.2669 | 5.7  | 6234  |
| 94  | 1135.2620 | 6.3  | 6939  |
| 95  | 1136.2590 | 5.1  | 5641  |
| 96  | 1207.2862 | 4.6  | 5107  |
| 97  | 1208.2843 | 4.8  | 5293  |
| 98  | 1209.2812 | 5.6  | 6119  |
| 99  | 1210.2760 | 4.9  | 5423  |
| 100 | 1283.2966 | 5.4  | 5924  |

---

### Acquisition Parameter

|             |            |                       |           |                            |           |
|-------------|------------|-----------------------|-----------|----------------------------|-----------|
| Source Type | ESI        | Ion Polarity          | Positive  | Set Nebulizer              | 0.4 Bar   |
| Focus       | Not active | Set Capillary         | 3600 V    | Set Dry Heater             | 180 °C    |
| Scan Begin  | 75 m/z     | Set End Plate Offset  | -500 V    | Set Dry Gas                | 4.0 l/min |
| Scan End    | 1700 m/z   | Set Collision Cell RF | 350.0 Vpp | Set Ion Energy ( MS only ) | 4.0 eV    |

# High Resolution Mass Spectrometry Report

Sample Name **JL-616**  
 Comment analyzed in MeOH

Instrument maXis 4G  
 Method 31 Direct\_neg\_low.m

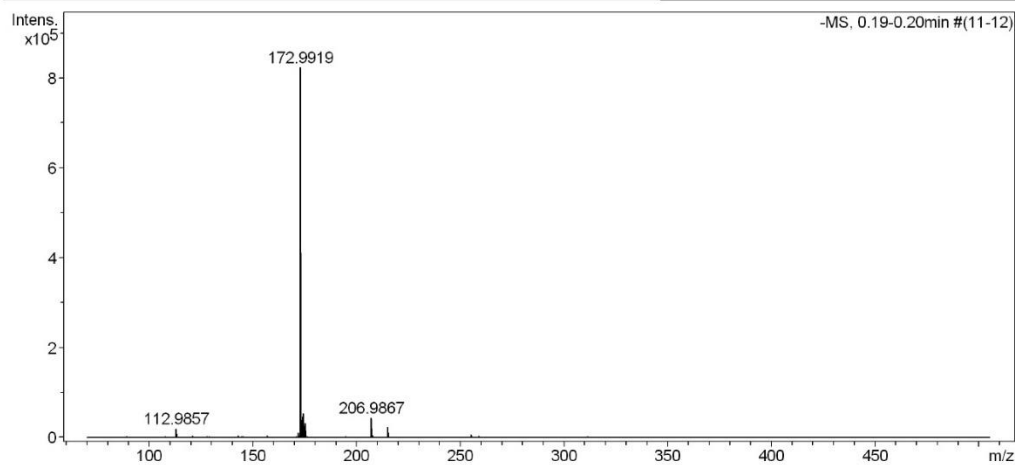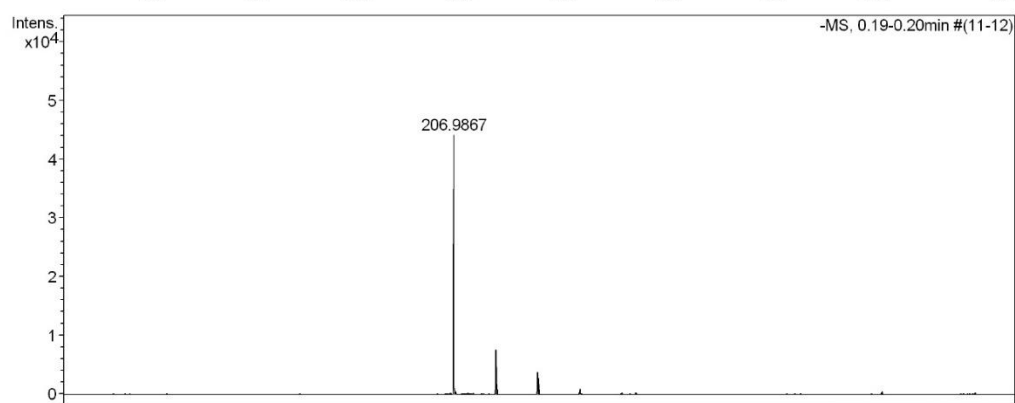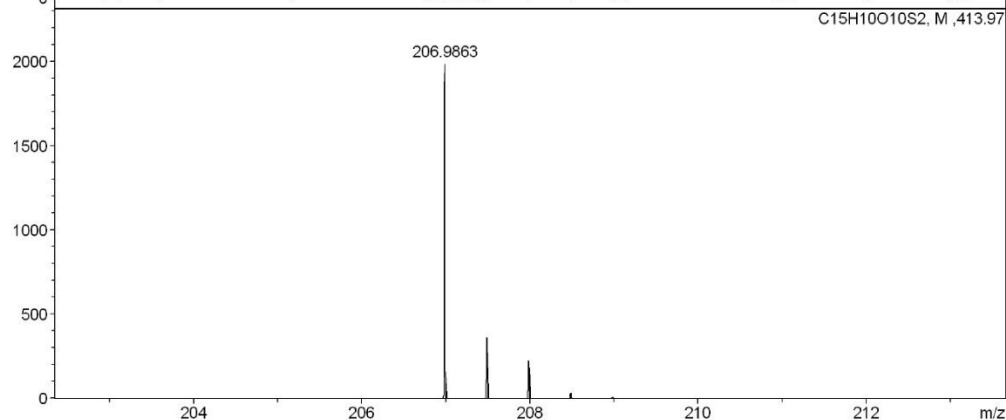

# High Resolution Mass Spectrometry Report

## Measured m/z vs. theoretical m/z

| Meas. m/z | # | Formula            | Score  | m/z      | err [mDa] | err [ppm] | mSigma | rdb  | e <sup>-</sup> Conf | z  |
|-----------|---|--------------------|--------|----------|-----------|-----------|--------|------|---------------------|----|
| 206.9867  | 1 | C 15 H 10 O 10 S 2 | 100.00 | 206.9863 | -0.4      | -1.9      | 22.4   | 11.0 | even                | 2- |

## Mass list

| #  | m/z      | I %   | I      |
|----|----------|-------|--------|
| 1  | 89.0247  | 0.3   | 2064   |
| 2  | 93.0352  | 0.1   | 1093   |
| 3  | 108.0217 | 0.4   | 3005   |
| 4  | 109.0293 | 0.2   | 1405   |
| 5  | 112.9857 | 2.5   | 20962  |
| 6  | 115.0404 | 0.2   | 1754   |
| 7  | 117.0196 | 0.1   | 1122   |
| 8  | 121.0295 | 0.7   | 5949   |
| 9  | 128.0353 | 0.4   | 2963   |
| 10 | 129.0558 | 0.3   | 2643   |
| 11 | 131.0349 | 0.1   | 1036   |
| 12 | 131.0715 | 0.1   | 1004   |
| 13 | 142.9814 | 0.2   | 1609   |
| 14 | 143.0718 | 0.1   | 1208   |
| 15 | 143.1077 | 0.7   | 5399   |
| 16 | 144.9644 | 0.2   | 2058   |
| 17 | 145.0508 | 0.4   | 3634   |
| 18 | 157.0871 | 0.2   | 1741   |
| 19 | 157.1234 | 0.6   | 4734   |
| 20 | 170.0044 | 0.1   | 1198   |
| 21 | 171.0666 | 0.2   | 1410   |
| 22 | 171.1030 | 0.2   | 1446   |
| 23 | 171.1395 | 0.3   | 2147   |
| 24 | 171.9838 | 1.5   | 12309  |
| 25 | 172.9919 | 100.0 | 823945 |
| 26 | 173.0825 | 0.1   | 1035   |
| 27 | 173.9946 | 6.6   | 54142  |
| 28 | 174.9875 | 4.1   | 34046  |
| 29 | 175.9909 | 0.3   | 2265   |
| 30 | 194.9734 | 0.4   | 3702   |
| 31 | 206.9867 | 5.4   | 44242  |
| 32 | 207.4882 | 0.9   | 7676   |
| 33 | 207.9855 | 0.5   | 3848   |
| 34 | 215.0020 | 2.9   | 23900  |
| 35 | 216.0055 | 0.2   | 2009   |
| 36 | 216.9986 | 0.1   | 1110   |
| 37 | 227.2019 | 0.1   | 1089   |
| 38 | 255.2328 | 0.8   | 6642   |
| 39 | 256.2364 | 0.2   | 1332   |
| 40 | 258.9919 | 0.7   | 5614   |
| 41 | 283.2639 | 0.2   | 2010   |
| 42 | 297.1529 | 0.2   | 1279   |
| 43 | 311.1691 | 0.3   | 2088   |
| 44 | 325.1848 | 0.2   | 1324   |

## Acquisition Parameter

|                   |                              |                |                                       |                |              |           |
|-------------------|------------------------------|----------------|---------------------------------------|----------------|--------------|-----------|
| <b>General</b>    | Fore Vacuum                  | 2.60e+000 mBar | High Vacuum                           | 1.19e-007 mBar | Source Type  | ESI       |
|                   | Scan Begin                   | 75 m/z         | Scan End                              | 500 m/z        | Ion Polarity | Negative  |
| <b>Source</b>     | Set Nebulizer                | 0.4 Bar        | Set Capillary                         | 4500 V         | Set Dry Gas  | 4.0 l/min |
|                   | Set Dry Heater               | 180 °C         | Set End Plate Offset                  | -500 V         |              |           |
| <b>Quadrupole</b> | Set Ion Energy ( MS only )   | -4.0 eV        |                                       |                |              |           |
| <b>Coll. Cell</b> | Collision Energy             | -5.0 eV        | Set Collision Cell RF                 | 50.0 Vpp       | 50.0 Vpp     |           |
| <b>Ion Cooler</b> | Set Ion Cooler Transfer Time | 25.0 µs        | Set Ion Cooler Pre Pulse Storage Time | 2.0 µs         |              |           |

## High Resolution Mass Spectrometry Report

Sample Name **JL-588**  
Comment

Instrument maXis 4G  
Method ms\_nocolumn\_mid\_pos.m

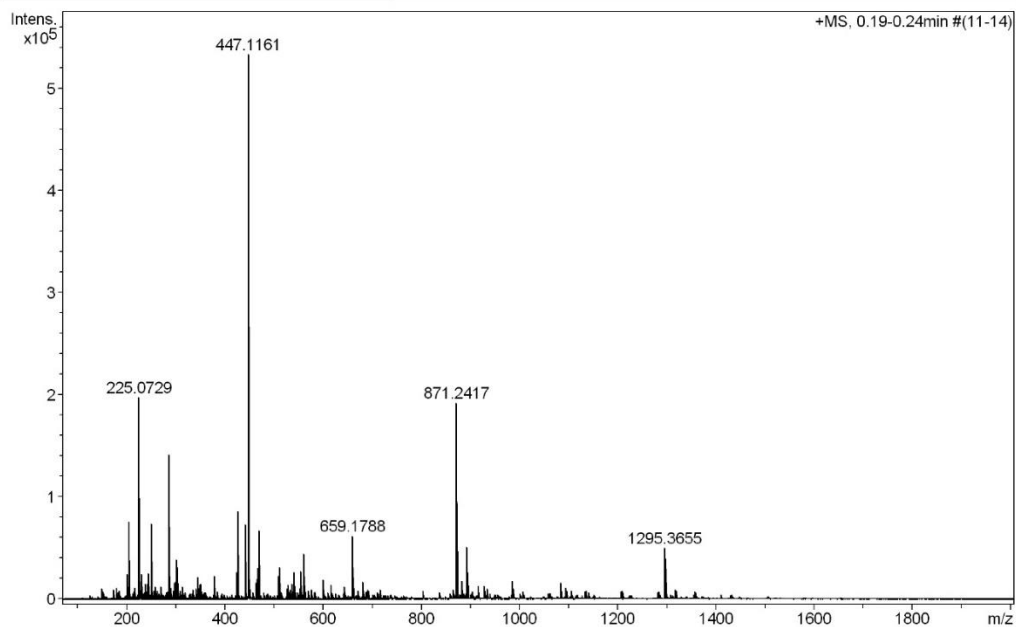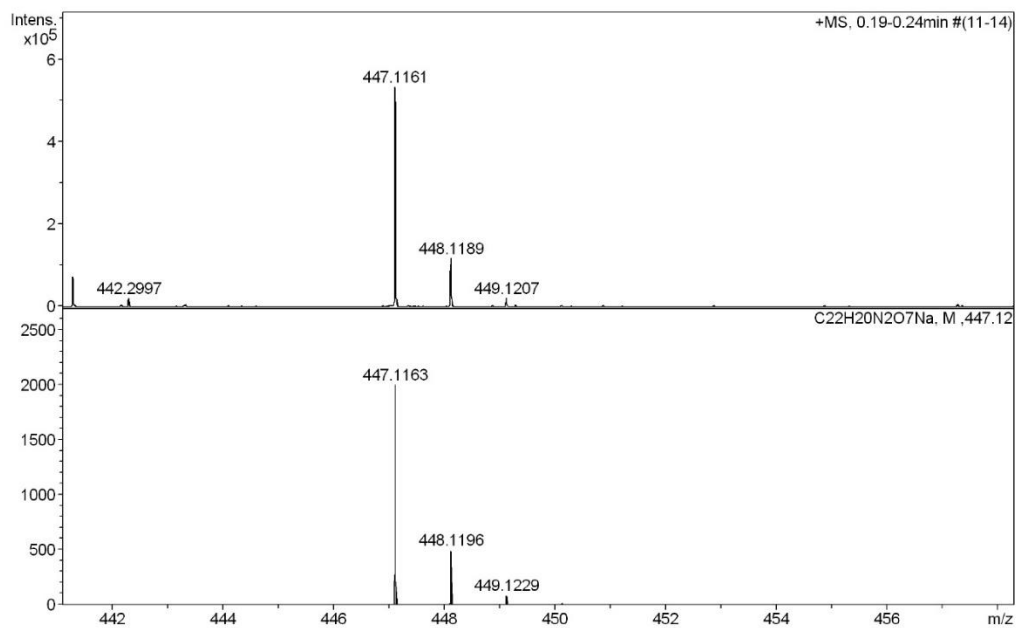

# High Resolution Mass Spectrometry Report

## Measured m/z vs. theoretical m/z

| Meas. m/z | # | Formula              | Score  | m/z      | err [mDa] | err [ppm] | mSigma | rdb  | e <sup>-</sup> Conf | z  |
|-----------|---|----------------------|--------|----------|-----------|-----------|--------|------|---------------------|----|
| 447.1161  | 1 | C 22 H 20 N 2 Na O 7 | 100.00 | 447.1163 | 0.2       | 0.4       | 14.8   | 13.5 | even                | 1+ |

## Mass list

| #  | m/z      | I %   | I      |
|----|----------|-------|--------|
| 1  | 149.9529 | 1.9   | 10103  |
| 2  | 173.0781 | 1.7   | 8821   |
| 3  | 179.0311 | 2.0   | 10764  |
| 4  | 201.1093 | 4.5   | 24226  |
| 5  | 205.0595 | 14.2  | 75702  |
| 6  | 217.1040 | 2.2   | 11504  |
| 7  | 225.0729 | 37.0  | 197558 |
| 8  | 226.0760 | 3.4   | 18154  |
| 9  | 226.9509 | 3.1   | 16355  |
| 10 | 230.0781 | 4.6   | 24645  |
| 11 | 239.0882 | 2.7   | 14430  |
| 12 | 242.2834 | 2.7   | 14580  |
| 13 | 245.0776 | 4.8   | 25531  |
| 14 | 250.9918 | 13.8  | 73796  |
| 15 | 251.0520 | 3.4   | 18011  |
| 16 | 257.0987 | 2.2   | 11879  |
| 17 | 269.2077 | 2.3   | 12021  |
| 18 | 286.1408 | 26.5  | 141465 |
| 19 | 287.1440 | 4.3   | 22728  |
| 20 | 288.9214 | 2.1   | 11205  |
| 21 | 297.0936 | 3.0   | 16033  |
| 22 | 300.1196 | 3.2   | 16868  |
| 23 | 301.1401 | 7.2   | 38575  |
| 24 | 302.0991 | 3.8   | 20038  |
| 25 | 304.2600 | 5.8   | 30927  |
| 26 | 313.2339 | 2.2   | 11690  |
| 27 | 335.1669 | 1.8   | 9468   |
| 28 | 341.2654 | 2.0   | 10543  |
| 29 | 345.2026 | 4.0   | 21449  |
| 30 | 348.9893 | 2.6   | 13771  |
| 31 | 350.2658 | 1.9   | 10196  |
| 32 | 350.9862 | 2.7   | 14565  |
| 33 | 379.1254 | 4.2   | 22204  |
| 34 | 379.1929 | 3.1   | 16418  |
| 35 | 423.2192 | 4.9   | 25965  |
| 36 | 425.1335 | 16.1  | 86171  |
| 37 | 426.1364 | 4.0   | 21462  |
| 38 | 441.2965 | 13.7  | 73382  |
| 39 | 442.2997 | 3.8   | 20424  |
| 40 | 447.1161 | 100.0 | 533712 |
| 41 | 448.1189 | 22.0  | 117579 |
| 42 | 449.1207 | 3.8   | 20049  |
| 43 | 463.0890 | 2.9   | 15726  |
| 44 | 465.1258 | 3.7   | 19890  |
| 45 | 467.2451 | 5.7   | 30418  |
| 46 | 469.0973 | 12.5  | 66947  |
| 47 | 470.1004 | 2.8   | 15055  |
| 48 | 509.0854 | 4.2   | 22575  |
| 49 | 511.2713 | 5.7   | 30683  |
| 50 | 527.0961 | 1.8   | 9855   |
| 51 | 528.5101 | 2.5   | 13478  |
| 52 | 533.0521 | 1.7   | 8912   |
| 53 | 537.0839 | 2.2   | 11940  |
| 54 | 537.3933 | 2.8   | 14774  |
| 55 | 541.1193 | 5.0   | 26589  |
| 56 | 542.1201 | 2.5   | 13378  |
| 57 | 543.1176 | 1.7   | 8906   |
| 58 | 553.4575 | 2.1   | 11216  |
| 59 | 555.2976 | 5.0   | 26910  |
| 60 | 561.1466 | 8.3   | 44082  |
| 61 | 562.1497 | 2.6   | 13625  |
| 62 | 577.0729 | 1.7   | 9122   |

## High Resolution Mass Spectrometry Report

| #   | m/z       | I %  | I      |
|-----|-----------|------|--------|
| 63  | 599.3236  | 3.6  | 19055  |
| 64  | 615.1382  | 2.7  | 14254  |
| 65  | 643.3497  | 2.3  | 12205  |
| 66  | 659.1788  | 11.6 | 61925  |
| 67  | 659.6803  | 9.3  | 49873  |
| 68  | 660.1814  | 4.1  | 21768  |
| 69  | 681.1604  | 3.2  | 16938  |
| 70  | 681.6618  | 2.3  | 12086  |
| 71  | 690.1605  | 1.7  | 9226   |
| 72  | 716.1939  | 1.7  | 9277   |
| 73  | 716.6944  | 1.7  | 8975   |
| 74  | 865.4213  | 1.8  | 9615   |
| 75  | 871.2417  | 36.0 | 192178 |
| 76  | 871.7428  | 7.7  | 41048  |
| 77  | 872.2444  | 17.6 | 93984  |
| 78  | 872.7455  | 1.9  | 10090  |
| 79  | 873.2463  | 4.6  | 24607  |
| 80  | 882.2319  | 3.1  | 16801  |
| 81  | 882.7329  | 3.3  | 17437  |
| 82  | 883.2349  | 1.8  | 9817   |
| 83  | 893.2227  | 9.5  | 50736  |
| 84  | 893.7241  | 2.8  | 15002  |
| 85  | 894.2260  | 4.9  | 26187  |
| 86  | 915.2035  | 2.4  | 12705  |
| 87  | 928.2560  | 2.1  | 11291  |
| 88  | 928.7574  | 2.4  | 12847  |
| 89  | 933.2106  | 1.9  | 10090  |
| 90  | 985.2709  | 3.4  | 18192  |
| 91  | 986.2735  | 1.9  | 10289  |
| 92  | 1083.3030 | 2.5  | 13185  |
| 93  | 1083.8058 | 3.0  | 16001  |
| 94  | 1084.3073 | 2.2  | 11723  |
| 95  | 1094.2932 | 1.7  | 9177   |
| 96  | 1094.7956 | 2.1  | 11160  |
| 97  | 1295.3655 | 9.3  | 49879  |
| 98  | 1296.3696 | 7.0  | 37176  |
| 99  | 1297.3709 | 3.0  | 16107  |
| 100 | 1317.3464 | 1.7  | 9331   |

### Acquisition Parameter

|                   |                              |                |                                       |                |              |           |
|-------------------|------------------------------|----------------|---------------------------------------|----------------|--------------|-----------|
| <b>General</b>    | Fore Vacuum                  | 2.40e+000 mBar | High Vacuum                           | 1.11e-007 mBar | Source Type  | ESI       |
|                   | Scan Begin                   | 75 m/z         | Scan End                              | 2000 m/z       | Ion Polarity | Positive  |
| <b>Source</b>     | Set Nebulizer                | 2.0 Bar        | Set Capillary                         | 4500 V         | Set Dry Gas  | 8.0 l/min |
|                   | Set Dry Heater               | 200 °C         | Set End Plate Offset                  | -500 V         |              |           |
| <b>Quadrupole</b> | Set Ion Energy ( MS only )   | 4.0 eV         |                                       |                |              |           |
| <b>Coll. Cell</b> | Collision Energy             | 8.0 eV         | Set Collision Cell RF                 | 600.0 Vpp      | 100.0 Vpp    |           |
| <b>Ion Cooler</b> | Set Ion Cooler Transfer Time | 75.0 µs        | Set Ion Cooler Pre Pulse Storage Time | 10.0 µs        |              |           |

# High Resolution Mass Spectrometry Report

Sample Name **JL-747**  
Comment

Instrument maXis 4G  
Method ms\_nocolumn\_mid\_pos.m

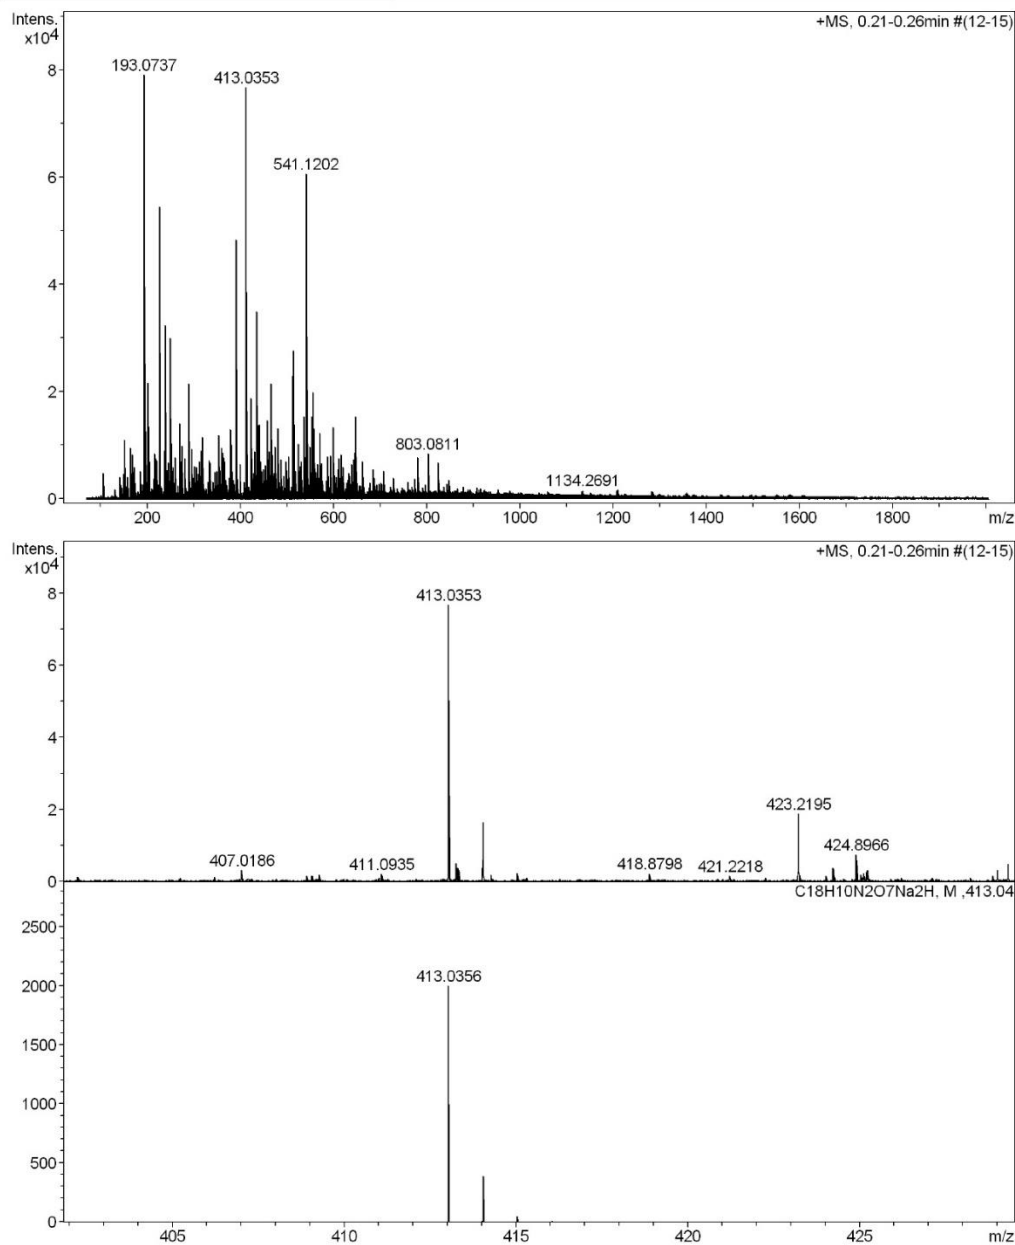

# High Resolution Mass Spectrometry Report

## Measured m/z vs. theoretical m/z

| Meas. m/z | # | Formula                | Score  | m/z      | err [mDa] | err [ppm] | mSigma | rdb  | e <sup>-</sup> Conf | z  |
|-----------|---|------------------------|--------|----------|-----------|-----------|--------|------|---------------------|----|
| 413.0353  | 1 | C 18 H 11 N 2 Na 2 O 7 | 100.00 | 413.0356 | 0.3       | 0.8       | 7.4    | 13.5 | even                | 1+ |

## Mass list

| #  | m/z      | I %   | I     |
|----|----------|-------|-------|
| 1  | 153.0339 | 13.9  | 10979 |
| 2  | 164.1070 | 12.2  | 9654  |
| 3  | 169.0111 | 10.4  | 8243  |
| 4  | 193.0737 | 100.0 | 79136 |
| 5  | 194.0767 | 7.9   | 6283  |
| 6  | 195.0707 | 32.0  | 25345 |
| 7  | 198.0524 | 8.2   | 6464  |
| 8  | 201.1095 | 27.6  | 21811 |
| 9  | 205.0597 | 17.2  | 13585 |
| 10 | 217.1042 | 10.7  | 8483  |
| 11 | 218.0810 | 9.5   | 7499  |
| 12 | 220.9341 | 9.2   | 7249  |
| 13 | 226.9513 | 69.0  | 54571 |
| 14 | 237.0846 | 11.4  | 9046  |
| 15 | 238.8838 | 10.2  | 8095  |
| 16 | 239.1614 | 9.2   | 7266  |
| 17 | 240.0628 | 40.9  | 32338 |
| 18 | 245.0779 | 8.7   | 6915  |
| 19 | 249.1361 | 38.0  | 30089 |
| 20 | 251.1330 | 13.2  | 10464 |
| 21 | 261.1306 | 9.8   | 7758  |
| 22 | 271.1178 | 17.8  | 14103 |
| 23 | 275.1613 | 12.6  | 9974  |
| 24 | 281.0480 | 9.6   | 7635  |
| 25 | 288.9217 | 27.1  | 21477 |
| 26 | 296.2192 | 11.9  | 9417  |
| 27 | 312.8881 | 8.8   | 6987  |
| 28 | 317.2447 | 11.5  | 9104  |
| 29 | 319.2602 | 14.7  | 11616 |
| 30 | 333.1695 | 9.1   | 7189  |
| 31 | 335.1673 | 8.6   | 6842  |
| 32 | 353.2655 | 15.2  | 12006 |
| 33 | 360.3229 | 12.1  | 9606  |
| 34 | 362.9261 | 10.9  | 8616  |
| 35 | 365.0900 | 8.6   | 6816  |
| 36 | 365.1050 | 9.9   | 7827  |
| 37 | 366.0881 | 8.8   | 6968  |
| 38 | 379.1935 | 16.4  | 12953 |
| 39 | 381.1005 | 12.8  | 10096 |
| 40 | 381.2969 | 12.3  | 9756  |
| 41 | 391.0534 | 61.1  | 48327 |
| 42 | 392.0565 | 13.1  | 10368 |
| 43 | 399.3074 | 8.2   | 6522  |
| 44 | 413.0353 | 97.0  | 76762 |
| 45 | 414.0385 | 20.8  | 16470 |
| 46 | 423.2195 | 23.8  | 18811 |
| 47 | 424.8966 | 9.6   | 7578  |
| 48 | 430.9132 | 11.3  | 8936  |
| 49 | 435.0172 | 44.1  | 34888 |
| 50 | 436.0197 | 8.6   | 6823  |
| 51 | 439.1236 | 17.5  | 13823 |
| 52 | 441.2969 | 17.6  | 13939 |
| 53 | 443.3337 | 8.9   | 7041  |
| 54 | 453.0243 | 8.0   | 6332  |
| 55 | 456.9988 | 18.5  | 14674 |
| 56 | 461.2884 | 11.2  | 8900  |
| 57 | 467.1015 | 25.7  | 20308 |
| 58 | 467.2458 | 27.3  | 21609 |
| 59 | 468.1021 | 10.6  | 8382  |
| 60 | 475.0057 | 12.3  | 9744  |
| 61 | 481.0220 | 16.8  | 13281 |
| 62 | 487.3599 | 9.3   | 7351  |

## High Resolution Mass Spectrometry Report

| #   | m/z      | I %  | I     |
|-----|----------|------|-------|
| 63  | 497.3955 | 8.8  | 7001  |
| 64  | 503.0039 | 10.0 | 7948  |
| 65  | 511.2719 | 28.9 | 22907 |
| 66  | 513.1432 | 34.9 | 27649 |
| 67  | 514.1443 | 14.9 | 11813 |
| 68  | 515.1415 | 9.8  | 7783  |
| 69  | 524.9862 | 13.0 | 10292 |
| 70  | 531.3861 | 9.0  | 7112  |
| 71  | 536.1649 | 19.5 | 15410 |
| 72  | 537.1653 | 10.2 | 8041  |
| 73  | 541.1202 | 76.7 | 60673 |
| 74  | 542.1211 | 38.3 | 30344 |
| 75  | 542.9926 | 11.9 | 9408  |
| 76  | 543.1190 | 25.9 | 20486 |
| 77  | 544.1185 | 9.5  | 7555  |
| 78  | 549.0098 | 12.4 | 9835  |
| 79  | 553.4584 | 19.4 | 15315 |
| 80  | 554.4615 | 8.0  | 6330  |
| 81  | 555.2982 | 25.0 | 19823 |
| 82  | 557.0938 | 16.7 | 13227 |
| 83  | 558.0947 | 7.9  | 6289  |
| 84  | 566.9599 | 8.1  | 6421  |
| 85  | 569.4322 | 15.6 | 12336 |
| 86  | 570.9913 | 11.3 | 8927  |
| 87  | 575.4123 | 8.5  | 6739  |
| 88  | 587.1619 | 10.1 | 7971  |
| 89  | 592.9732 | 10.2 | 8101  |
| 90  | 599.3245 | 17.0 | 13453 |
| 91  | 610.9802 | 9.6  | 7569  |
| 92  | 615.1388 | 10.5 | 8282  |
| 93  | 638.9783 | 8.2  | 6468  |
| 94  | 643.3505 | 9.4  | 7419  |
| 95  | 646.1548 | 10.9 | 8639  |
| 96  | 648.1536 | 19.3 | 15292 |
| 97  | 660.9612 | 8.9  | 7006  |
| 98  | 781.0990 | 9.7  | 7709  |
| 99  | 803.0811 | 10.7 | 8485  |
| 100 | 825.0627 | 8.6  | 6815  |

### Acquisition Parameter

|                   |                              |                |                                       |                |              |           |
|-------------------|------------------------------|----------------|---------------------------------------|----------------|--------------|-----------|
| <b>General</b>    | Fore Vacuum                  | 2.48e+000 mBar | High Vacuum                           | 9.43e-008 mBar | Source Type  | ESI       |
|                   | Scan Begin                   | 75 m/z         | Scan End                              | 2000 m/z       | Ion Polarity | Positive  |
| <b>Source</b>     | Set Nebulizer                | 2.0 Bar        | Set Capillary                         | 4500 V         | Set Dry Gas  | 8.0 l/min |
|                   | Set Dry Heater               | 200 °C         | Set End Plate Offset                  | -500 V         |              |           |
| <b>Quadrupole</b> | Set Ion Energy ( MS only )   | 4.0 eV         |                                       |                |              |           |
| <b>Coll. Cell</b> | Collision Energy             | 8.0 eV         | Set Collision Cell RF                 | 600.0 Vpp      | 100.0 Vpp    |           |
| <b>Ion Cooler</b> | Set Ion Cooler Transfer Time | 75.0 µs        | Set Ion Cooler Pre Pulse Storage Time | 10.0 µs        |              |           |

## High Resolution Mass Spectrometry Report

Sample Name **JL-717**  
Comment analyzed in MeOH

Instrument maXis 4G  
Method 21 Direct\_pos\_low.m

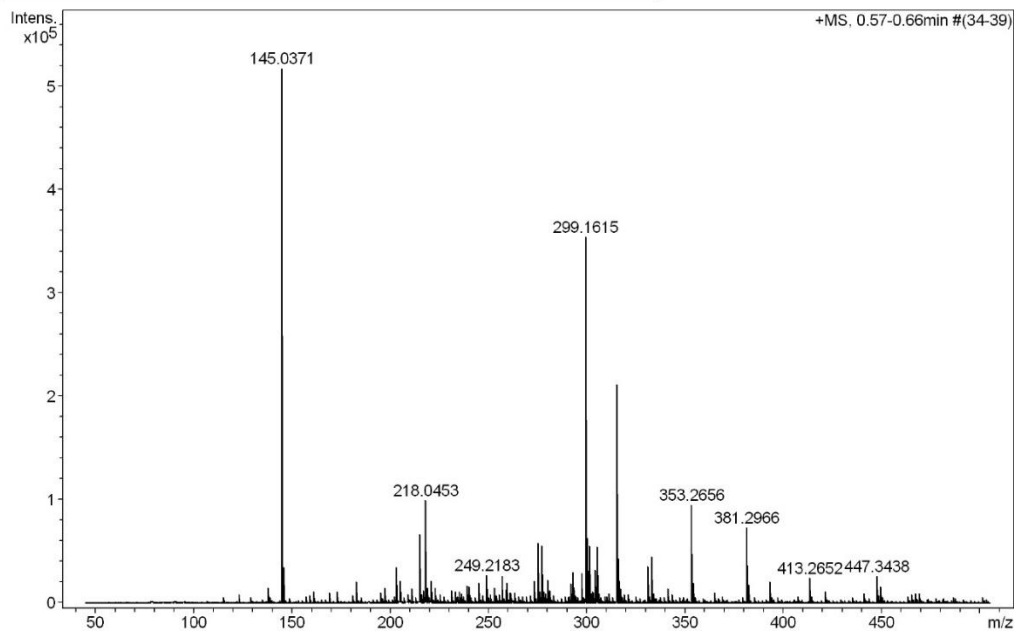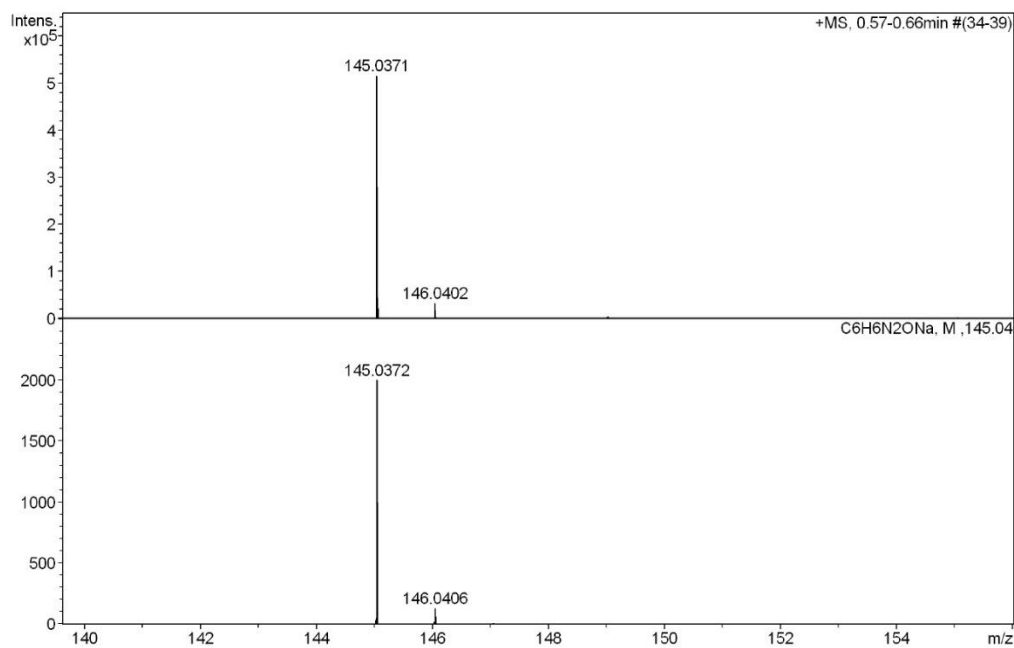

# High Resolution Mass Spectrometry Report

## Measured m/z vs. theoretical m/z

| Meas. m/z | # | Formula          | Score  | m/z      | err [mDa] | err [ppm] | mSigma | rdb | e <sup>-</sup> Conf | z  |
|-----------|---|------------------|--------|----------|-----------|-----------|--------|-----|---------------------|----|
| 145.0371  | 1 | C 6 H 6 N 2 Na O | 100.00 | 145.0372 | 0.1       | 0.8       | 4.3    | 4.5 | even                | 1+ |

## Mass list

| #  | m/z      | I %   | I      |
|----|----------|-------|--------|
| 1  | 138.0887 | 2.8   | 14635  |
| 2  | 145.0371 | 100.0 | 517375 |
| 3  | 146.0402 | 6.6   | 34402  |
| 4  | 161.0109 | 2.0   | 10352  |
| 5  | 161.0957 | 2.2   | 11146  |
| 6  | 169.0468 | 1.9   | 9937   |
| 7  | 173.0781 | 2.1   | 10643  |
| 8  | 183.0527 | 4.0   | 20865  |
| 9  | 195.0626 | 1.6   | 8300   |
| 10 | 195.0991 | 1.9   | 9736   |
| 11 | 197.0780 | 2.8   | 14687  |
| 12 | 203.0522 | 6.6   | 34304  |
| 13 | 205.0597 | 4.1   | 21130  |
| 14 | 209.1145 | 1.6   | 8446   |
| 15 | 211.0938 | 2.7   | 14166  |
| 16 | 215.0675 | 12.9  | 66664  |
| 17 | 217.1044 | 2.3   | 11983  |
| 18 | 218.0453 | 19.2  | 99125  |
| 19 | 219.1354 | 2.9   | 15043  |
| 20 | 221.1166 | 4.2   | 21488  |
| 21 | 223.0940 | 2.8   | 14551  |
| 22 | 225.1096 | 1.6   | 8287   |
| 23 | 231.1351 | 1.9   | 9674   |
| 24 | 231.1713 | 2.3   | 11869  |
| 25 | 233.0776 | 2.2   | 11393  |
| 26 | 235.1301 | 1.7   | 8982   |
| 27 | 235.1682 | 2.1   | 10739  |
| 28 | 236.0712 | 1.8   | 9371   |
| 29 | 239.0886 | 3.2   | 16798  |
| 30 | 240.0271 | 3.0   | 15519  |
| 31 | 245.0778 | 3.8   | 19589  |
| 32 | 245.1871 | 3.6   | 18405  |
| 33 | 249.1456 | 2.0   | 10238  |
| 34 | 249.2183 | 5.2   | 26680  |
| 35 | 253.2133 | 2.9   | 15234  |
| 36 | 255.2676 | 1.7   | 8638   |
| 37 | 257.1506 | 5.1   | 26166  |
| 38 | 259.1297 | 2.5   | 12686  |
| 39 | 259.2026 | 3.7   | 19213  |
| 40 | 261.1268 | 1.9   | 9868   |
| 41 | 263.1247 | 1.9   | 9750   |
| 42 | 273.2183 | 4.2   | 21738  |
| 43 | 275.1248 | 11.3  | 58482  |
| 44 | 275.1975 | 1.6   | 8415   |
| 45 | 276.1279 | 1.9   | 9784   |
| 46 | 276.1587 | 2.1   | 10997  |
| 47 | 277.1402 | 2.5   | 13172  |
| 48 | 277.1788 | 3.6   | 18459  |
| 49 | 277.2132 | 3.4   | 17464  |
| 50 | 277.2496 | 10.6  | 54859  |
| 51 | 278.1762 | 1.8   | 9357   |
| 52 | 278.2522 | 2.1   | 11055  |
| 53 | 279.2290 | 1.8   | 9410   |
| 54 | 280.1901 | 4.2   | 21950  |
| 55 | 281.1716 | 2.2   | 11546  |
| 56 | 292.1904 | 3.5   | 18325  |
| 57 | 293.1740 | 5.8   | 30125  |
| 58 | 293.2077 | 2.2   | 11224  |
| 59 | 293.2444 | 2.6   | 13371  |
| 60 | 297.2393 | 5.7   | 29387  |
| 61 | 299.1615 | 68.4  | 354124 |
| 62 | 300.1642 | 12.2  | 62910  |

# High Resolution Mass Spectrometry Report

| #   | m/z      | I %  | I      |
|-----|----------|------|--------|
| 63  | 301.1404 | 10.8 | 55730  |
| 64  | 301.1750 | 3.4  | 17367  |
| 65  | 302.1438 | 1.8  | 9220   |
| 66  | 303.0845 | 2.2  | 11419  |
| 67  | 303.2288 | 2.0  | 10421  |
| 68  | 304.2605 | 6.1  | 31510  |
| 69  | 305.1003 | 10.4 | 53923  |
| 70  | 305.2443 | 2.7  | 13787  |
| 71  | 305.2805 | 2.4  | 12332  |
| 72  | 306.1034 | 1.8  | 9064   |
| 73  | 311.1247 | 1.8  | 9118   |
| 74  | 315.1353 | 5.8  | 29922  |
| 75  | 315.1561 | 40.8 | 211004 |
| 76  | 315.2647 | 1.6  | 8353   |
| 77  | 316.1588 | 8.4  | 43279  |
| 78  | 317.1703 | 2.6  | 13688  |
| 79  | 317.2807 | 2.2  | 11345  |
| 80  | 321.2388 | 1.6  | 8209   |
| 81  | 331.1300 | 6.9  | 35612  |
| 82  | 331.1499 | 2.9  | 15045  |
| 83  | 333.1666 | 8.6  | 44632  |
| 84  | 334.1698 | 1.7  | 8768   |
| 85  | 341.2655 | 2.7  | 14124  |
| 86  | 353.2656 | 18.4 | 95229  |
| 87  | 354.2688 | 3.8  | 19744  |
| 88  | 365.2735 | 1.9  | 9957   |
| 89  | 381.2966 | 14.1 | 72830  |
| 90  | 382.3001 | 3.3  | 17282  |
| 91  | 393.2970 | 4.0  | 20726  |
| 92  | 413.2652 | 4.6  | 23975  |
| 93  | 421.2093 | 2.2  | 11515  |
| 94  | 421.3278 | 1.8  | 9118   |
| 95  | 441.2962 | 1.8  | 9112   |
| 96  | 447.3438 | 5.0  | 25694  |
| 97  | 449.3724 | 3.1  | 15818  |
| 98  | 465.3689 | 1.6  | 8479   |
| 99  | 467.3845 | 1.8  | 9253   |
| 100 | 469.3269 | 1.8  | 9241   |

## Acquisition Parameter

|                   |                              |                |                                       |                |              |           |
|-------------------|------------------------------|----------------|---------------------------------------|----------------|--------------|-----------|
| <b>General</b>    | Fore Vacuum                  | 2.48e+000 mBar | High Vacuum                           | 9.56e-008 mBar | Source Type  | ESI       |
|                   | Scan Begin                   | 50 m/z         | Scan End                              | 500 m/z        | Ion Polarity | Positive  |
| <b>Source</b>     | Set Nebulizer                | 0.4 Bar        | Set Capillary                         | 3600 V         | Set Dry Gas  | 3.0 l/min |
|                   | Set Dry Heater               | 180 °C         | Set End Plate Offset                  | -500 V         |              |           |
| <b>Quadrupole</b> | Set Ion Energy ( MS only )   | 4.0 eV         |                                       |                |              |           |
| <b>Coll. Cell</b> | Collision Energy             | 8.0 eV         | Set Collision Cell RF                 | 350.0 Vpp      | 55.0 Vpp     |           |
| <b>Ion Cooler</b> | Set Ion Cooler Transfer Time | 55.0 µs        | Set Ion Cooler Pre Pulse Storage Time | 7.0 µs         |              |           |

## High Resolution Mass Spectrometry Report

Sample Name **JL-628**  
Comment

Instrument maXis 4G  
Method ms\_c18\_300-600\_neg\_2min.m

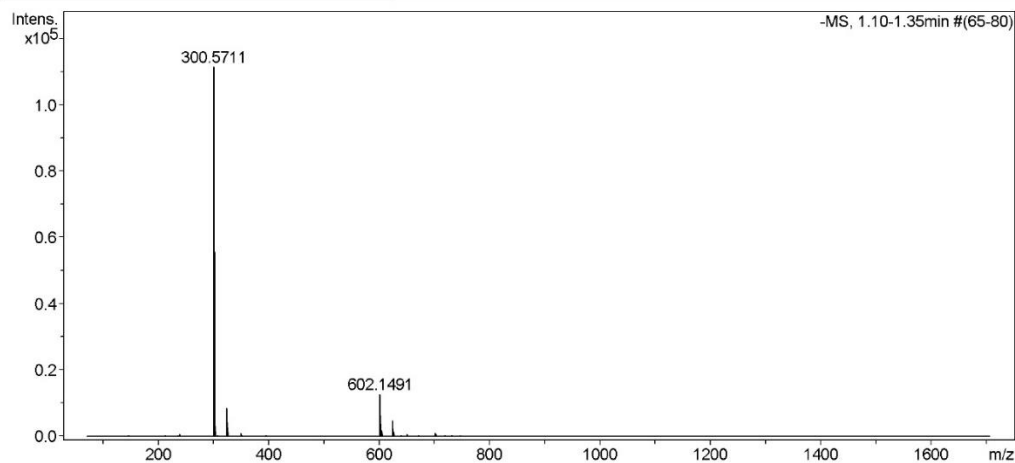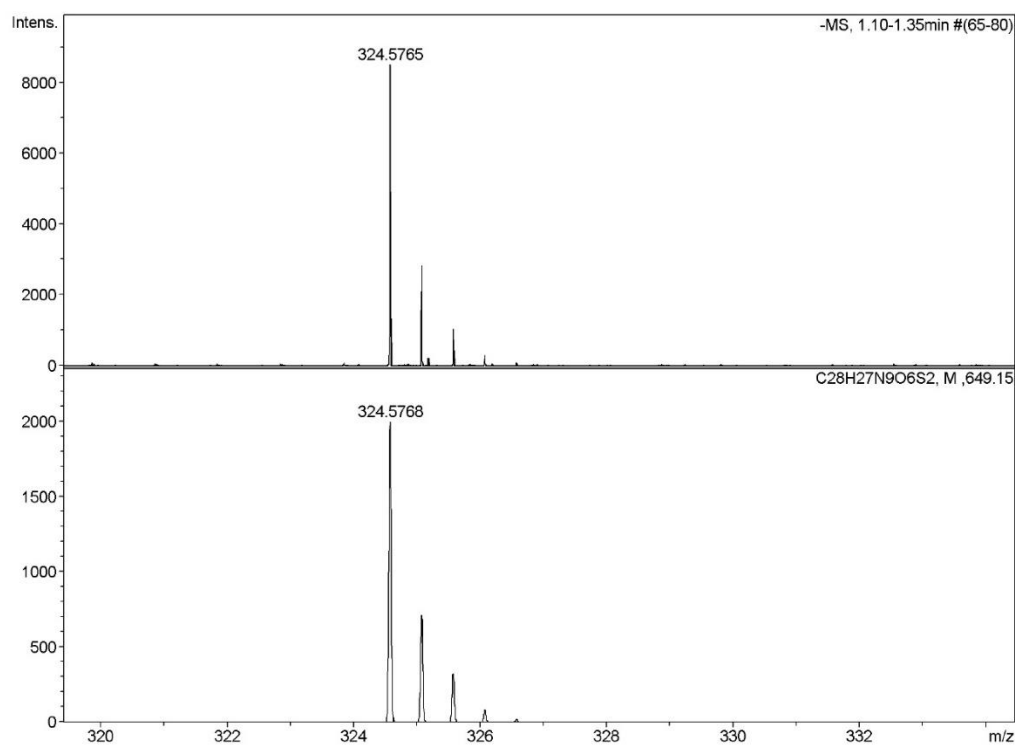

# High Resolution Mass Spectrometry Report

## Measured m/z vs. theoretical m/z

| Meas. m/z | # | Formula                                                                      | Score  | m/z      | err [mDa] | err [ppm] | mSigma | rdb  | e <sup>-</sup> Conf | z  |
|-----------|---|------------------------------------------------------------------------------|--------|----------|-----------|-----------|--------|------|---------------------|----|
| 324.5765  | 1 | C <sub>28</sub> H <sub>27</sub> N <sub>9</sub> O <sub>6</sub> S <sub>2</sub> | 100.00 | 324.5768 | 0.4       | 1.1       | 26.9   | 20.0 | even                | 2- |

## Mass list

| #  | m/z      | I %   | I      |
|----|----------|-------|--------|
| 1  | 300.5711 | 100.0 | 111455 |
| 2  | 301.0724 | 29.2  | 32555  |
| 3  | 301.5706 | 11.8  | 13135  |
| 4  | 302.0711 | 3.1   | 3427   |
| 5  | 324.5765 | 7.6   | 8520   |
| 6  | 325.0778 | 2.5   | 2827   |
| 7  | 325.5764 | 1.0   | 1059   |
| 8  | 602.1491 | 11.5  | 12838  |
| 9  | 603.1517 | 3.6   | 4017   |
| 10 | 604.1481 | 1.5   | 1644   |
| 11 | 624.1309 | 4.4   | 4917   |
| 12 | 625.1336 | 1.3   | 1491   |
| 13 | 702.0742 | 1.0   | 1104   |

## Acquisition Parameter

|                   |                              |                |                                       |                |              |           |
|-------------------|------------------------------|----------------|---------------------------------------|----------------|--------------|-----------|
| <b>General</b>    | Fore Vacuum                  | 2.29e+000 mBar | High Vacuum                           | 9.97e-008 mBar | Source Type  | ESI       |
|                   | Scan Begin                   | 75 m/z         | Scan End                              | 1700 m/z       | Ion Polarity | Negative  |
| <b>Source</b>     | Set Nebulizer                | 2.0 Bar        | Set Capillary                         | 4500 V         | Set Dry Gas  | 8.0 l/min |
|                   | Set Dry Heater               | 200 °C         | Set End Plate Offset                  | -500 V         |              |           |
| <b>Quadrupole</b> | Set Ion Energy ( MS only )   | -4.0 eV        |                                       |                |              |           |
| <b>Coll. Cell</b> | Collision Energy             | -10.0 eV       | Set Collision Cell RF                 | 350.0 Vpp      | 100.0 Vpp    |           |
| <b>Ion Cooler</b> | Set Ion Cooler Transfer Time | 75.0 µs        | Set Ion Cooler Pre Pulse Storage Time | 10.0 µs        |              |           |

## High Resolution Mass Spectrometry Report

Sample Name **JL-732**  
Comment

Instrument maXis 4G  
Method ms\_nocolumn\_high\_pos\_use\_acn.m

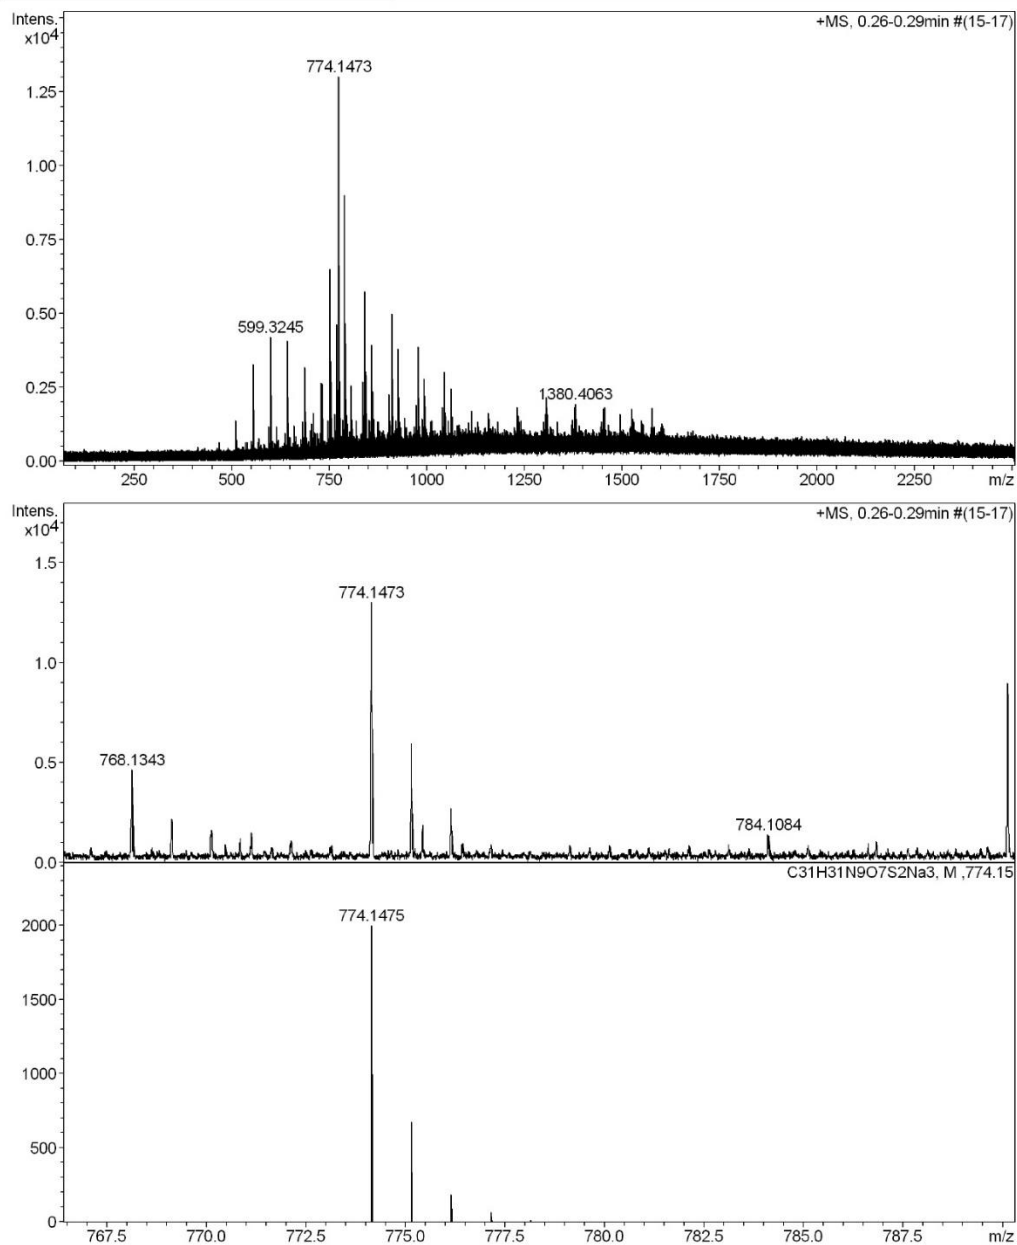

# High Resolution Mass Spectrometry Report

## Measured m/z vs. theoretical m/z

| Meas. m/z | # | Formula                                                                                      | Score  | m/z      | err [mDa] | err [ppm] | mSigma | rdb  | e <sup>-</sup> Conf | z  |
|-----------|---|----------------------------------------------------------------------------------------------|--------|----------|-----------|-----------|--------|------|---------------------|----|
| 774.1473  | 1 | C <sub>31</sub> H <sub>31</sub> N <sub>9</sub> Na <sub>3</sub> O <sub>7</sub> S <sub>2</sub> | 100.00 | 774.1475 | 0.3       | 0.3       | 41.2   | 19.5 | even                | 1+ |

## Mass list

| #  | m/z      | I %   | I     |
|----|----------|-------|-------|
| 1  | 511.2726 | 10.6  | 1380  |
| 2  | 555.2983 | 25.3  | 3290  |
| 3  | 599.3245 | 32.4  | 4218  |
| 4  | 600.3289 | 11.2  | 1457  |
| 5  | 643.3517 | 31.3  | 4081  |
| 6  | 644.3542 | 10.2  | 1328  |
| 7  | 682.4238 | 10.3  | 1345  |
| 8  | 687.3776 | 24.7  | 3212  |
| 9  | 688.3818 | 10.5  | 1363  |
| 10 | 703.3511 | 9.8   | 1283  |
| 11 | 708.5098 | 12.6  | 1641  |
| 12 | 730.1839 | 20.5  | 2677  |
| 13 | 731.4043 | 20.3  | 2642  |
| 14 | 746.1521 | 10.6  | 1375  |
| 15 | 752.1651 | 50.0  | 6517  |
| 16 | 753.1675 | 19.6  | 2558  |
| 17 | 754.1617 | 11.5  | 1499  |
| 18 | 764.6412 | 12.3  | 1607  |
| 19 | 768.1343 | 35.7  | 4656  |
| 20 | 769.1354 | 16.8  | 2183  |
| 21 | 770.1281 | 12.9  | 1675  |
| 22 | 771.1310 | 11.8  | 1534  |
| 23 | 774.1473 | 100.0 | 13030 |
| 24 | 775.1513 | 46.0  | 5989  |
| 25 | 775.4316 | 14.6  | 1897  |
| 26 | 776.1489 | 20.9  | 2721  |
| 27 | 784.1084 | 10.6  | 1382  |
| 28 | 790.1204 | 69.1  | 9009  |
| 29 | 791.1246 | 30.7  | 4003  |
| 30 | 792.1128 | 19.9  | 2597  |
| 31 | 793.1080 | 12.3  | 1597  |
| 32 | 794.0967 | 12.1  | 1571  |
| 33 | 806.0956 | 19.8  | 2584  |
| 34 | 807.0970 | 11.5  | 1494  |
| 35 | 836.1173 | 18.9  | 2466  |
| 36 | 837.1213 | 10.6  | 1388  |
| 37 | 838.8399 | 10.9  | 1421  |
| 38 | 842.1353 | 44.2  | 5762  |
| 39 | 843.1376 | 21.3  | 2772  |
| 40 | 844.1379 | 13.6  | 1778  |
| 41 | 852.0932 | 10.9  | 1421  |
| 42 | 854.0717 | 10.7  | 1389  |
| 43 | 858.1090 | 30.3  | 3954  |
| 44 | 859.1119 | 17.4  | 2267  |
| 45 | 860.0875 | 18.2  | 2370  |
| 46 | 861.0932 | 11.2  | 1463  |
| 47 | 862.0830 | 12.4  | 1615  |
| 48 | 864.0804 | 11.1  | 1444  |
| 49 | 904.1064 | 17.5  | 2274  |
| 50 | 910.1228 | 38.3  | 4995  |
| 51 | 911.1249 | 18.7  | 2442  |
| 52 | 912.1242 | 11.8  | 1540  |
| 53 | 926.0952 | 25.2  | 3285  |
| 54 | 927.1025 | 16.4  | 2131  |
| 55 | 928.0812 | 16.7  | 2172  |
| 56 | 942.0684 | 11.5  | 1503  |
| 57 | 972.0912 | 14.8  | 1927  |
| 58 | 978.1104 | 29.8  | 3876  |
| 59 | 979.1133 | 16.0  | 2083  |
| 60 | 988.0654 | 11.3  | 1467  |
| 61 | 994.0850 | 21.5  | 2796  |
| 62 | 995.0858 | 14.4  | 1877  |

## High Resolution Mass Spectrometry Report

| #  | m/z       | I %  | I    |
|----|-----------|------|------|
| 63 | 996.0684  | 12.6 | 1636 |
| 64 | 1040.0786 | 14.2 | 1853 |
| 65 | 1046.0990 | 23.2 | 3028 |
| 66 | 1062.0695 | 18.9 | 2465 |
| 67 | 1063.0758 | 12.7 | 1650 |
| 68 | 1064.0696 | 11.6 | 1518 |
| 69 | 1114.0850 | 13.1 | 1712 |
| 70 | 1156.3474 | 12.6 | 1643 |
| 71 | 1157.3484 | 12.1 | 1577 |
| 72 | 1230.3685 | 12.4 | 1611 |
| 73 | 1231.3665 | 14.1 | 1834 |
| 74 | 1232.3674 | 12.4 | 1611 |
| 75 | 1304.3873 | 12.3 | 1605 |
| 76 | 1305.3874 | 13.7 | 1786 |
| 77 | 1306.3804 | 12.6 | 1646 |
| 78 | 1307.3827 | 12.4 | 1612 |
| 79 | 1379.4055 | 14.3 | 1864 |
| 80 | 1380.4063 | 15.0 | 1954 |
| 81 | 1381.4037 | 14.4 | 1875 |
| 82 | 1453.4243 | 13.6 | 1770 |
| 83 | 1454.4319 | 14.3 | 1865 |
| 84 | 1455.4235 | 13.2 | 1721 |
| 85 | 1494.9403 | 12.3 | 1605 |
| 86 | 1523.8931 | 12.8 | 1666 |
| 87 | 1577.8078 | 13.8 | 1803 |

### Acquisition Parameter

|                   |                              |                |                                       |                |              |           |
|-------------------|------------------------------|----------------|---------------------------------------|----------------|--------------|-----------|
| <b>General</b>    | Fore Vacuum                  | 2.40e+000 mBar | High Vacuum                           | 1.06e-007 mBar | Source Type  | ESI       |
|                   | Scan Begin                   | 75 m/z         | Scan End                              | 2500 m/z       | Ion Polarity | Positive  |
| <b>Source</b>     | Set Nebulizer                | 2.0 Bar        | Set Capillary                         | 4500 V         | Set Dry Gas  | 8.0 l/min |
|                   | Set Dry Heater               | 200 °C         | Set End Plate Offset                  | -500 V         |              |           |
| <b>Quadrupole</b> | Set Ion Energy ( MS only )   | 4.0 eV         |                                       |                |              |           |
| <b>Coll. Cell</b> | Collision Energy             | 12.0 eV        | Set Collision Cell RF                 | 2000.0 Vpp     | 800.0 Vpp    |           |
| <b>Ion Cooler</b> | Set Ion Cooler Transfer Time | 120.0 µs       | Set Ion Cooler Pre Pulse Storage Time | 18.0 µs        |              |           |

## High Resolution Mass Spectrometry Report

Sample Name **JL-707** Instrument **maXis 4G**  
 Comment **dissolved in acetone, analyzed in MeCN** Method **22 Direct\_pos\_mid.m**

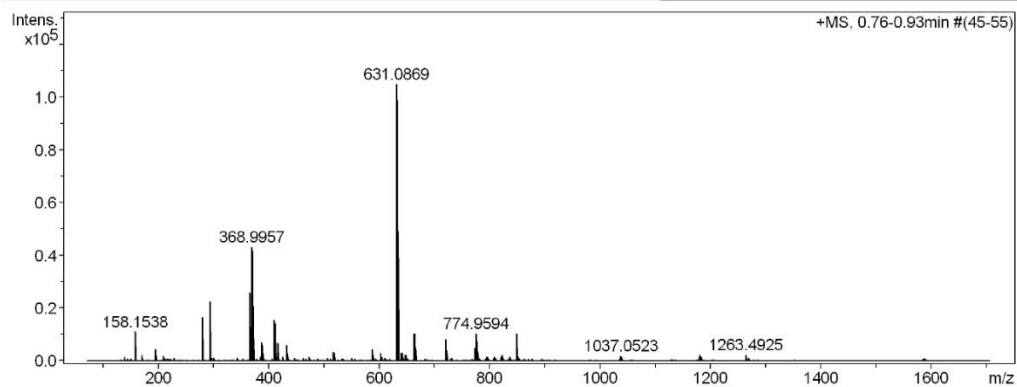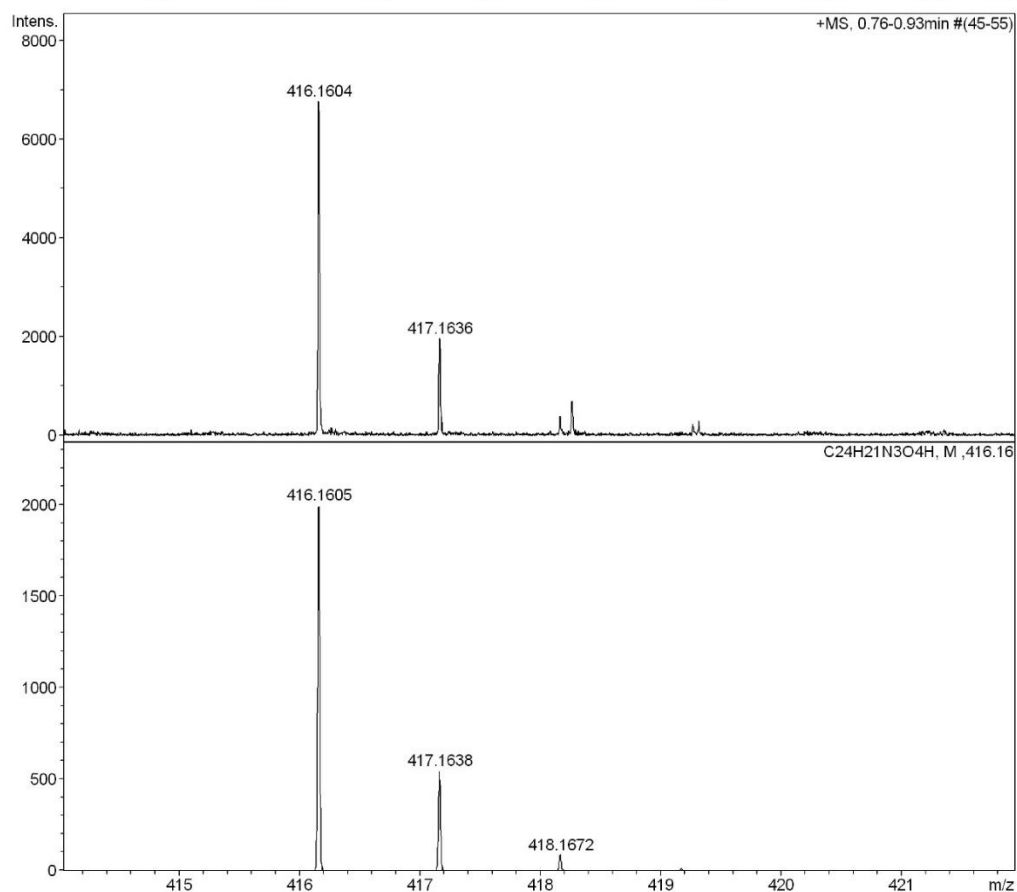

# High Resolution Mass Spectrometry Report

## Measured m/z vs. theoretical m/z

| Meas. m/z | # | Formula                                                       | Score  | m/z      | err [mDa] | err [ppm] | mSigma | rdb  | e <sup>-</sup> Conf | z  |
|-----------|---|---------------------------------------------------------------|--------|----------|-----------|-----------|--------|------|---------------------|----|
| 416.1604  | 1 | C <sub>24</sub> H <sub>22</sub> N <sub>3</sub> O <sub>4</sub> | 100.00 | 416.1605 | 0.1       | 0.2       | 27.8   | 15.5 | even                | 1+ |

## Mass list

| #  | m/z      | I %   | I      |
|----|----------|-------|--------|
| 1  | 139.0729 | 1.5   | 1622   |
| 2  | 158.1538 | 10.6  | 11154  |
| 3  | 159.1572 | 1.1   | 1130   |
| 4  | 170.1174 | 2.4   | 2504   |
| 5  | 196.0636 | 4.3   | 4535   |
| 6  | 210.1486 | 1.7   | 1797   |
| 7  | 228.1595 | 1.1   | 1141   |
| 8  | 279.0933 | 15.8  | 16666  |
| 9  | 280.0969 | 3.1   | 3293   |
| 10 | 293.1090 | 21.3  | 22447  |
| 11 | 294.1122 | 4.3   | 4522   |
| 12 | 297.0594 | 1.3   | 1400   |
| 13 | 301.0754 | 1.3   | 1347   |
| 14 | 343.0304 | 1.1   | 1208   |
| 15 | 366.0467 | 24.8  | 26051  |
| 16 | 367.0498 | 5.9   | 6160   |
| 17 | 368.0450 | 10.6  | 11163  |
| 18 | 368.9957 | 41.2  | 43277  |
| 19 | 369.0480 | 2.3   | 2413   |
| 20 | 369.9990 | 8.1   | 8528   |
| 21 | 370.9954 | 39.8  | 41830  |
| 22 | 371.9986 | 8.3   | 8762   |
| 23 | 386.0217 | 1.4   | 1442   |
| 24 | 387.0060 | 6.7   | 6992   |
| 25 | 388.0133 | 1.3   | 1321   |
| 26 | 389.0060 | 5.7   | 5971   |
| 27 | 390.0093 | 1.3   | 1346   |
| 28 | 410.0221 | 14.7  | 15500  |
| 29 | 411.0256 | 3.4   | 3621   |
| 30 | 412.0220 | 13.8  | 14541  |
| 31 | 413.0251 | 3.1   | 3269   |
| 32 | 416.1604 | 6.4   | 6780   |
| 33 | 417.1636 | 1.9   | 1976   |
| 34 | 425.3627 | 1.7   | 1780   |
| 35 | 433.1869 | 5.7   | 5984   |
| 36 | 434.1904 | 1.9   | 1994   |
| 37 | 462.2913 | 1.1   | 1131   |
| 38 | 473.3202 | 1.6   | 1640   |
| 39 | 506.3172 | 1.2   | 1228   |
| 40 | 517.2955 | 3.1   | 3306   |
| 41 | 519.2950 | 3.1   | 3262   |
| 42 | 550.3435 | 1.2   | 1214   |
| 43 | 587.1112 | 4.3   | 4532   |
| 44 | 588.1143 | 1.6   | 1694   |
| 45 | 589.1097 | 2.1   | 2185   |
| 46 | 603.1058 | 2.9   | 3074   |
| 47 | 604.1090 | 1.3   | 1368   |
| 48 | 605.1053 | 1.4   | 1428   |
| 49 | 610.1833 | 1.3   | 1364   |
| 50 | 631.0869 | 100.0 | 105149 |
| 51 | 632.0901 | 37.2  | 39132  |
| 52 | 633.0869 | 94.1  | 98962  |
| 53 | 634.0898 | 37.1  | 39035  |
| 54 | 635.0929 | 6.9   | 7280   |
| 55 | 640.7639 | 3.0   | 3134   |
| 56 | 641.2658 | 2.9   | 3062   |
| 57 | 641.7666 | 1.4   | 1450   |
| 58 | 643.2414 | 1.2   | 1287   |
| 59 | 647.0808 | 2.1   | 2230   |
| 60 | 649.0810 | 2.1   | 2221   |
| 61 | 663.0584 | 9.8   | 10303  |
| 62 | 664.0618 | 3.7   | 3916   |

## High Resolution Mass Spectrometry Report

| #   | m/z       | I %  | I     |
|-----|-----------|------|-------|
| 63  | 665.0583  | 9.9  | 10406 |
| 64  | 666.0620  | 3.9  | 4059  |
| 65  | 667.0622  | 1.1  | 1122  |
| 66  | 721.1477  | 7.8  | 8206  |
| 67  | 722.1508  | 3.1  | 3232  |
| 68  | 730.9835  | 1.0  | 1101  |
| 69  | 772.9603  | 4.8  | 5066  |
| 70  | 773.9636  | 2.0  | 2067  |
| 71  | 774.9594  | 10.1 | 10602 |
| 72  | 775.9632  | 4.1  | 4301  |
| 73  | 776.9589  | 7.1  | 7462  |
| 74  | 777.9629  | 2.6  | 2727  |
| 75  | 778.9591  | 1.7  | 1738  |
| 76  | 794.7218  | 1.5  | 1603  |
| 77  | 796.7376  | 1.6  | 1641  |
| 78  | 808.7376  | 1.5  | 1580  |
| 79  | 810.7524  | 1.1  | 1173  |
| 80  | 820.7383  | 1.6  | 1634  |
| 81  | 822.7529  | 2.3  | 2390  |
| 82  | 823.7566  | 1.3  | 1325  |
| 83  | 824.7672  | 1.1  | 1194  |
| 84  | 836.7680  | 1.5  | 1586  |
| 85  | 848.3400  | 9.9  | 10459 |
| 86  | 848.7692  | 1.6  | 1633  |
| 87  | 849.3432  | 5.7  | 5996  |
| 88  | 850.3461  | 1.8  | 1923  |
| 89  | 850.7844  | 1.3  | 1348  |
| 90  | 853.2958  | 1.3  | 1317  |
| 91  | 1037.0523 | 2.1  | 2160  |
| 92  | 1038.0532 | 1.2  | 1280  |
| 93  | 1039.0512 | 1.4  | 1464  |
| 94  | 1178.9254 | 1.6  | 1667  |
| 95  | 1180.9244 | 2.1  | 2175  |
| 96  | 1181.9277 | 1.1  | 1199  |
| 97  | 1182.9245 | 1.5  | 1582  |
| 98  | 1263.4925 | 2.3  | 2392  |
| 99  | 1264.4960 | 2.2  | 2293  |
| 100 | 1268.4492 | 1.1  | 1155  |

### Acquisition Parameter

|                   |                              |                |                                       |                |              |           |
|-------------------|------------------------------|----------------|---------------------------------------|----------------|--------------|-----------|
| <b>General</b>    | Fore Vacuum                  | 2.48e+000 mBar | High Vacuum                           | 1.11e-007 mBar | Source Type  | ESI       |
|                   | Scan Begin                   | 75 m/z         | Scan End                              | 1700 m/z       | Ion Polarity | Positive  |
| <b>Source</b>     | Set Nebulizer                | 0.4 Bar        | Set Capillary                         | 3600 V         | Set Dry Gas  | 4.0 l/min |
|                   | Set Dry Heater               | 180 °C         | Set End Plate Offset                  | -500 V         |              |           |
| <b>Quadrupole</b> | Set Ion Energy ( MS only )   | 4.0 eV         |                                       |                |              |           |
| <b>Coll. Cell</b> | Collision Energy             | 8.0 eV         | Set Collision Cell RF                 | 350.0 Vpp      | 100.0 Vpp    |           |
| <b>Ion Cooler</b> | Set Ion Cooler Transfer Time | 75.0 µs        | Set Ion Cooler Pre Pulse Storage Time | 10.0 µs        |              |           |

## High Resolution Mass Spectrometry Report

Sample Name **JL-710**  
Comment

Instrument maXis 4G  
Method ms\_nocolumn\_mid\_neg.m

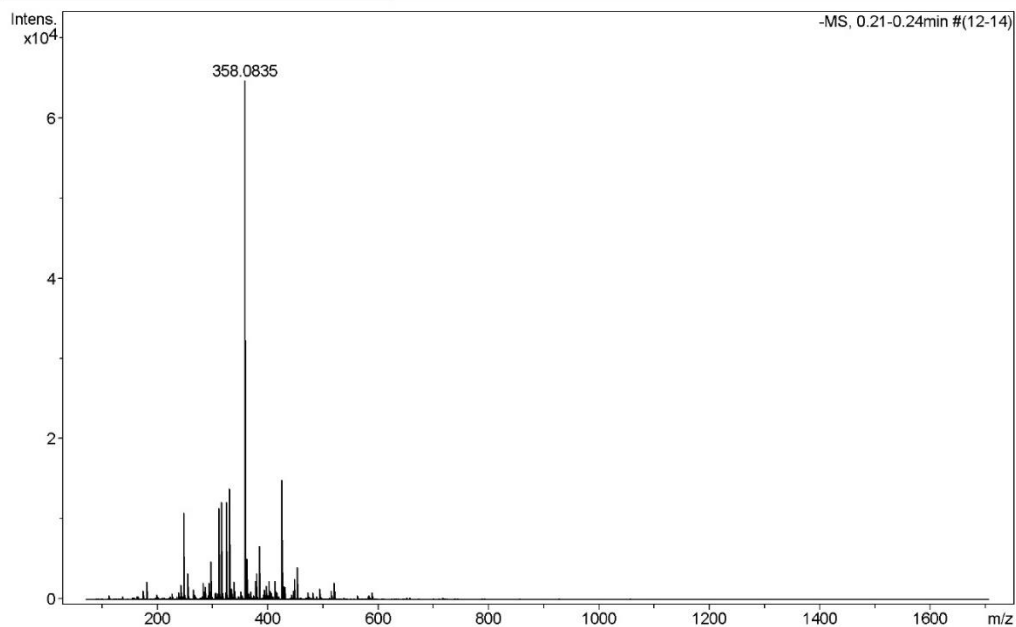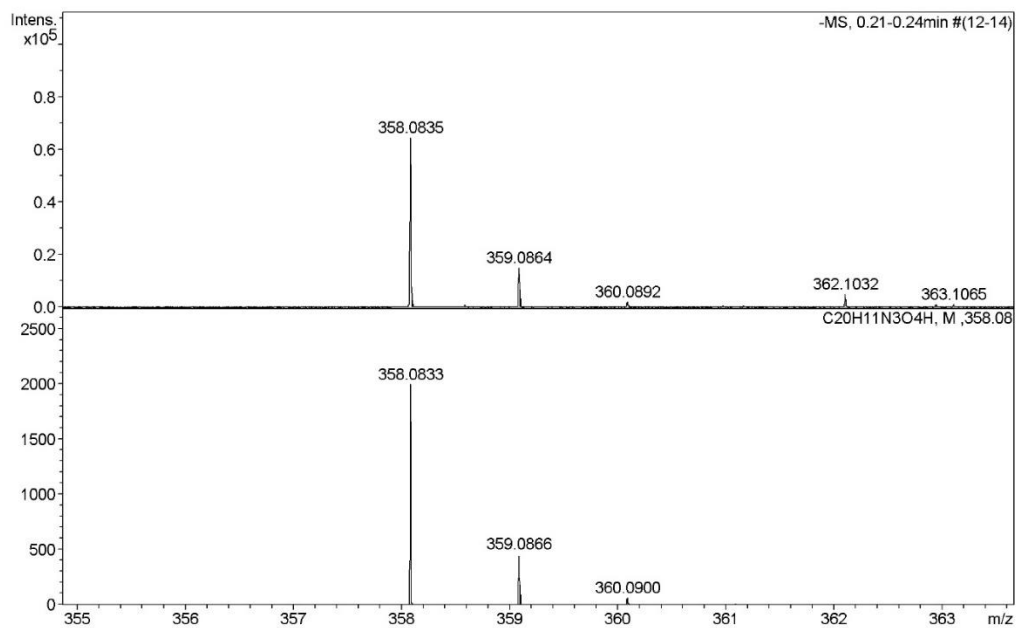

# High Resolution Mass Spectrometry Report

## Measured m/z vs. theoretical m/z

| Meas. m/z | # | Formula                                                       | Score  | m/z      | err [mDa] | err [ppm] | mSigma | rdB  | e <sup>-</sup> Conf | z  |
|-----------|---|---------------------------------------------------------------|--------|----------|-----------|-----------|--------|------|---------------------|----|
| 358.0835  | 1 | C <sub>20</sub> H <sub>12</sub> N <sub>3</sub> O <sub>4</sub> | 100.00 | 358.0833 | -0.2      | -0.4      | 2.6    | 16.5 | even                | 1- |

## Mass list

| #  | m/z      | I %   | I     |
|----|----------|-------|-------|
| 1  | 174.9561 | 1.7   | 1109  |
| 2  | 180.9731 | 3.4   | 2220  |
| 3  | 242.9436 | 2.9   | 1863  |
| 4  | 248.9605 | 16.7  | 10774 |
| 5  | 255.2329 | 5.0   | 3222  |
| 6  | 265.1476 | 1.9   | 1258  |
| 7  | 283.2644 | 3.2   | 2092  |
| 8  | 286.0870 | 2.2   | 1414  |
| 9  | 293.1767 | 3.1   | 1988  |
| 10 | 297.1530 | 7.2   | 4674  |
| 11 | 310.9308 | 2.7   | 1763  |
| 12 | 311.1685 | 17.6  | 11412 |
| 13 | 312.1718 | 3.7   | 2421  |
| 14 | 316.9482 | 18.8  | 12153 |
| 15 | 325.1841 | 18.8  | 12155 |
| 16 | 326.1871 | 4.6   | 2991  |
| 17 | 330.0770 | 21.4  | 13810 |
| 18 | 331.0807 | 4.7   | 3060  |
| 19 | 333.0769 | 1.8   | 1151  |
| 20 | 334.8972 | 2.1   | 1327  |
| 21 | 339.1997 | 3.4   | 2181  |
| 22 | 358.0835 | 100.0 | 64682 |
| 23 | 359.0864 | 23.2  | 15003 |
| 24 | 360.0892 | 3.3   | 2135  |
| 25 | 362.1032 | 7.8   | 5034  |
| 26 | 363.1065 | 1.9   | 1199  |
| 27 | 378.9184 | 3.5   | 2257  |
| 28 | 379.1562 | 1.8   | 1135  |
| 29 | 380.0651 | 5.0   | 3240  |
| 30 | 384.9354 | 10.2  | 6625  |
| 31 | 393.1715 | 1.8   | 1195  |
| 32 | 398.0647 | 2.7   | 1718  |
| 33 | 402.8851 | 3.5   | 2262  |
| 34 | 404.8821 | 1.6   | 1060  |
| 35 | 414.0590 | 3.6   | 2338  |
| 36 | 426.0708 | 23.1  | 14935 |
| 37 | 427.0736 | 5.2   | 3365  |
| 38 | 430.0904 | 2.4   | 1544  |
| 39 | 446.9060 | 1.7   | 1104  |
| 40 | 448.0525 | 3.9   | 2509  |
| 41 | 452.9229 | 6.2   | 4015  |
| 42 | 494.0586 | 2.0   | 1311  |
| 43 | 516.0404 | 1.8   | 1135  |
| 44 | 520.9103 | 3.2   | 2038  |

## Acquisition Parameter

|                   |                              |                |                                       |                |              |           |
|-------------------|------------------------------|----------------|---------------------------------------|----------------|--------------|-----------|
| <b>General</b>    | Fore Vacuum                  | 2.60e+000 mBar | High Vacuum                           | 1.01e-007 mBar | Source Type  | ESI       |
|                   | Scan Begin                   | 75 m/z         | Scan End                              | 1700 m/z       | Ion Polarity | Negative  |
| <b>Source</b>     | Set Nebulizer                | 0.4 Bar        | Set Capillary                         | 4500 V         | Set Dry Gas  | 4.0 l/min |
|                   | Set Dry Heater               | 180 °C         | Set End Plate Offset                  | -500 V         |              |           |
| <b>Quadrupole</b> | Set Ion Energy ( MS only )   | -4.0 eV        |                                       |                |              |           |
| <b>Coll. Cell</b> | Collision Energy             | -10.0 eV       | Set Collision Cell RF                 | 100.0 Vpp      | 100.0 Vpp    |           |
| <b>Ion Cooler</b> | Set Ion Cooler Transfer Time | 75.0 µs        | Set Ion Cooler Pre Pulse Storage Time | 10.0 µs        |              |           |

# High Resolution Mass Spectrometry Report

Sample Name **JL-720**  
 Comment analyzed in MeOH

Instrument maXis 4G  
 Method 22 Direct\_pos\_mid.m

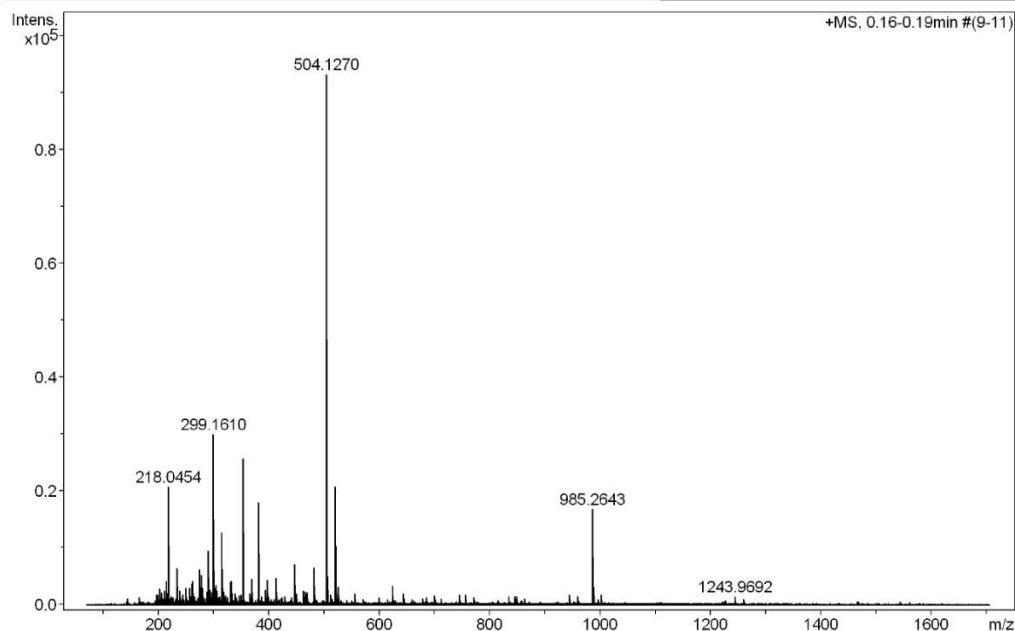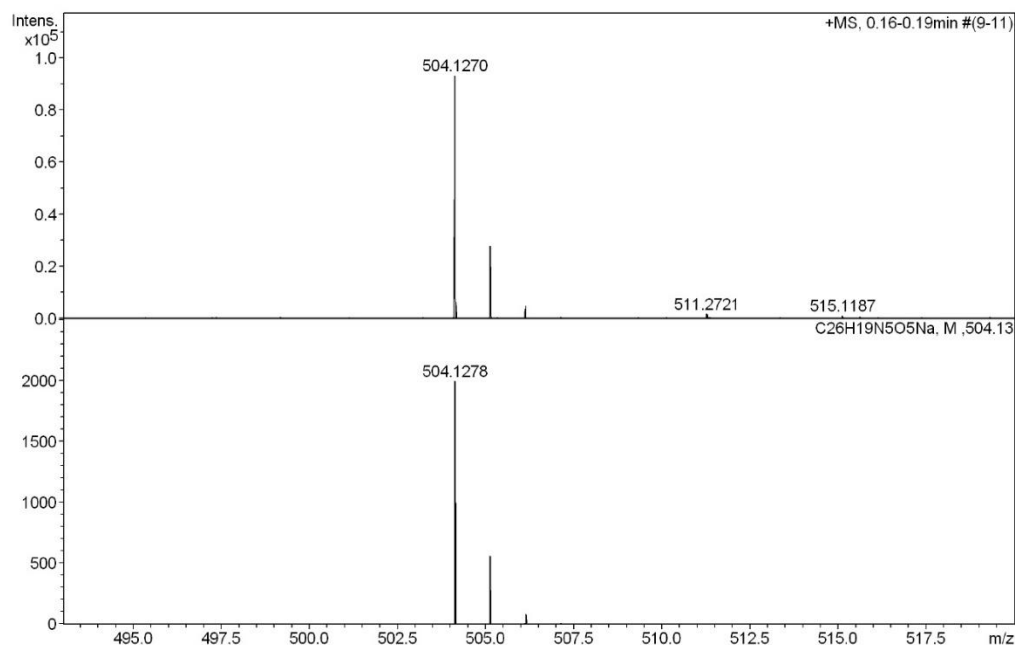

## High Resolution Mass Spectrometry Report

### Measured m/z vs. theoretical m/z

| Meas. m/z | # | Formula                                                         | Score  | m/z      | err [mDa] | err [ppm] | mSigma | rdb  | e <sup>-</sup> Conf | z  |
|-----------|---|-----------------------------------------------------------------|--------|----------|-----------|-----------|--------|------|---------------------|----|
| 504.1270  | 1 | C <sub>26</sub> H <sub>19</sub> N <sub>5</sub> NaO <sub>5</sub> | 100.00 | 504.1278 | 0.9       | 1.7       | 0.2    | 19.5 | even                | 1+ |

### Mass list

| #  | m/z      | I %  | I     |
|----|----------|------|-------|
| 1  | 197.0779 | 2.0  | 1873  |
| 2  | 198.0842 | 1.9  | 1762  |
| 3  | 203.0520 | 3.1  | 2931  |
| 4  | 205.0600 | 2.3  | 2184  |
| 5  | 211.0938 | 2.8  | 2573  |
| 6  | 215.0678 | 4.5  | 4227  |
| 7  | 217.1045 | 2.1  | 1961  |
| 8  | 218.0454 | 22.3 | 20777 |
| 9  | 218.2109 | 2.1  | 1934  |
| 10 | 219.0484 | 2.0  | 1845  |
| 11 | 234.0194 | 4.7  | 4394  |
| 12 | 234.2057 | 6.9  | 6455  |
| 13 | 239.0887 | 1.7  | 1559  |
| 14 | 240.0270 | 2.8  | 2574  |
| 15 | 245.0778 | 1.9  | 1817  |
| 16 | 249.2183 | 3.3  | 3057  |
| 17 | 257.1505 | 3.2  | 2995  |
| 18 | 261.1299 | 3.9  | 3683  |
| 19 | 262.2372 | 4.6  | 4311  |
| 20 | 274.2732 | 3.2  | 2972  |
| 21 | 275.1243 | 6.7  | 6291  |
| 22 | 277.1776 | 1.9  | 1734  |
| 23 | 277.2130 | 3.6  | 3328  |
| 24 | 277.2494 | 5.6  | 5183  |
| 25 | 279.2290 | 3.2  | 3027  |
| 26 | 288.2888 | 2.5  | 2313  |
| 27 | 290.2682 | 10.2 | 9489  |
| 28 | 291.1926 | 1.8  | 1706  |
| 29 | 291.2706 | 2.2  | 2072  |
| 30 | 293.1735 | 2.9  | 2661  |
| 31 | 293.2078 | 2.7  | 2491  |
| 32 | 293.2447 | 2.2  | 2063  |
| 33 | 297.2391 | 2.4  | 2264  |
| 34 | 299.1610 | 32.1 | 29975 |
| 35 | 300.1642 | 6.3  | 5897  |
| 36 | 301.1402 | 6.5  | 6088  |
| 37 | 303.2285 | 1.7  | 1610  |
| 38 | 304.2602 | 3.8  | 3533  |
| 39 | 304.2834 | 1.8  | 1698  |
| 40 | 305.1560 | 2.3  | 2183  |
| 41 | 305.2444 | 2.7  | 2486  |
| 42 | 315.1350 | 4.6  | 4271  |
| 43 | 315.1559 | 13.7 | 12734 |
| 44 | 315.1919 | 1.9  | 1763  |
| 45 | 316.1590 | 3.2  | 2983  |
| 46 | 317.1706 | 1.8  | 1719  |
| 47 | 319.2235 | 2.5  | 2332  |
| 48 | 321.2390 | 1.8  | 1642  |
| 49 | 331.1300 | 3.9  | 3642  |
| 50 | 331.1873 | 4.3  | 4024  |
| 51 | 333.1670 | 4.5  | 4163  |
| 52 | 339.1776 | 2.2  | 2062  |
| 53 | 347.1822 | 1.8  | 1650  |
| 54 | 349.1826 | 2.0  | 1903  |
| 55 | 353.2654 | 27.6 | 25783 |
| 56 | 354.2688 | 6.0  | 5561  |
| 57 | 365.2757 | 2.1  | 1971  |
| 58 | 369.2389 | 5.0  | 4646  |
| 59 | 381.2966 | 19.3 | 17980 |
| 60 | 382.3001 | 4.3  | 3968  |
| 61 | 386.2236 | 1.7  | 1550  |
| 62 | 393.2975 | 2.9  | 2691  |

# High Resolution Mass Spectrometry Report

| #   | m/z       | I %   | I     |
|-----|-----------|-------|-------|
| 63  | 397.2152  | 4.8   | 4465  |
| 64  | 397.2699  | 3.5   | 3248  |
| 65  | 397.7164  | 1.7   | 1600  |
| 66  | 399.1757  | 1.7   | 1564  |
| 67  | 413.2651  | 5.1   | 4712  |
| 68  | 414.2684  | 1.6   | 1532  |
| 69  | 447.3431  | 7.6   | 7122  |
| 70  | 448.3475  | 2.1   | 1943  |
| 71  | 449.3724  | 2.1   | 1976  |
| 72  | 463.3180  | 2.8   | 2603  |
| 73  | 465.3686  | 2.5   | 2352  |
| 74  | 467.2454  | 2.0   | 1893  |
| 75  | 469.3261  | 2.3   | 2107  |
| 76  | 482.1446  | 7.1   | 6645  |
| 77  | 483.1487  | 1.8   | 1659  |
| 78  | 504.1270  | 100.0 | 93259 |
| 79  | 505.1300  | 30.0  | 27960 |
| 80  | 506.1325  | 5.4   | 5020  |
| 81  | 511.2721  | 2.0   | 1844  |
| 82  | 520.1007  | 22.2  | 20749 |
| 83  | 521.1038  | 6.6   | 6153  |
| 84  | 522.1019  | 2.4   | 2226  |
| 85  | 526.1079  | 3.4   | 3126  |
| 86  | 555.2981  | 2.1   | 1967  |
| 87  | 624.0852  | 3.5   | 3295  |
| 88  | 644.0107  | 2.1   | 1958  |
| 89  | 699.1829  | 1.8   | 1718  |
| 90  | 744.6960  | 2.0   | 1833  |
| 91  | 745.1963  | 1.9   | 1737  |
| 92  | 755.6867  | 1.9   | 1742  |
| 93  | 756.1899  | 1.9   | 1780  |
| 94  | 848.3023  | 1.7   | 1554  |
| 95  | 943.9900  | 1.9   | 1774  |
| 96  | 959.9641  | 1.7   | 1566  |
| 97  | 985.2643  | 18.0  | 16815 |
| 98  | 986.2679  | 11.5  | 10737 |
| 99  | 987.2702  | 3.5   | 3220  |
| 100 | 1001.2398 | 2.0   | 1845  |

## Acquisition Parameter

|                   |                              |                |                                       |                |              |           |
|-------------------|------------------------------|----------------|---------------------------------------|----------------|--------------|-----------|
| <b>General</b>    | Fore Vacuum                  | 2.53e+000 mBar | High Vacuum                           | 9.56e-008 mBar | Source Type  | ESI       |
|                   | Scan Begin                   | 75 m/z         | Scan End                              | 1700 m/z       | Ion Polarity | Positive  |
| <b>Source</b>     | Set Nebulizer                | 0.4 Bar        | Set Capillary                         | 3600 V         | Set Dry Gas  | 4.0 l/min |
|                   | Set Dry Heater               | 180 °C         | Set End Plate Offset                  | -500 V         |              |           |
| <b>Quadrupole</b> | Set Ion Energy ( MS only )   | 4.0 eV         |                                       |                |              |           |
| <b>Coll. Cell</b> | Collision Energy             | 8.0 eV         | Set Collision Cell RF                 | 350.0 Vpp      | 100.0 Vpp    |           |
| <b>Ion Cooler</b> | Set Ion Cooler Transfer Time | 75.0 µs        | Set Ion Cooler Pre Pulse Storage Time | 10.0 µs        |              |           |

## High Resolution Mass Spectrometry Report

Sample Name **JL-745**  
Comment

Instrument maXis 4G  
Method 34 Direct\_neg\_high.m

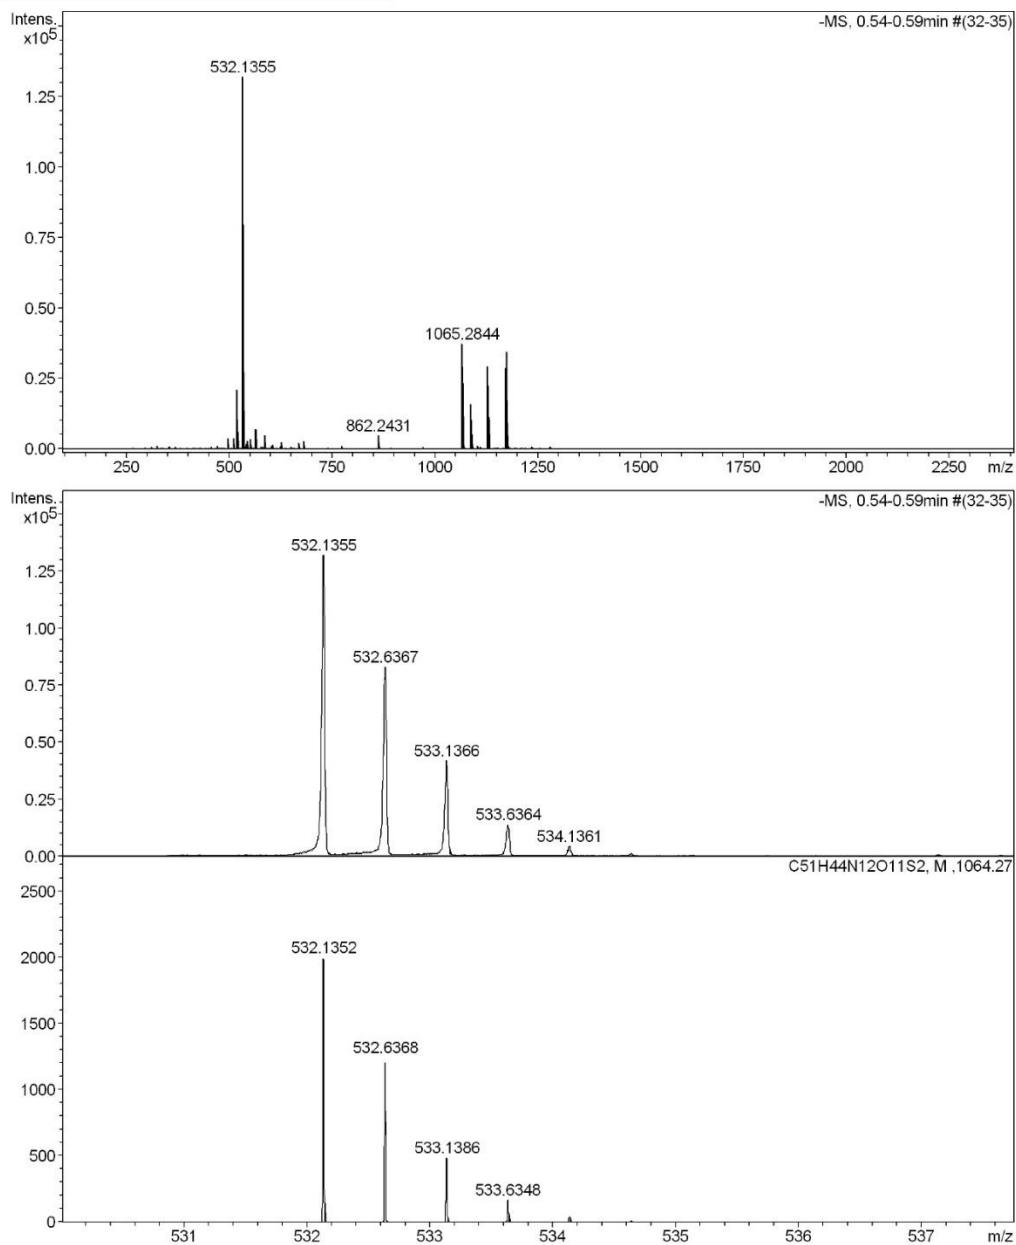

## High Resolution Mass Spectrometry Report

### Measured m/z vs. theoretical m/z

| Meas. m/z | # | Formula                 | Score  | m/z      | err [mDa] | err [ppm] | mSigma | rdb  | e <sup>-</sup> Conf | z  |
|-----------|---|-------------------------|--------|----------|-----------|-----------|--------|------|---------------------|----|
| 532.1355  | 1 | C 51 H 44 N 12 O 11 S 2 | 100.00 | 532.1352 | -0.2      | -0.4      | 10.0   | 36.0 | even                | 2- |

### Mass list

| #  | m/z      | I %   | I      |
|----|----------|-------|--------|
| 1  | 325.1843 | 0.8   | 1055   |
| 2  | 471.1320 | 0.8   | 995    |
| 3  | 496.1374 | 2.9   | 3803   |
| 4  | 496.6371 | 2.3   | 3080   |
| 5  | 497.1368 | 1.0   | 1305   |
| 6  | 510.1390 | 2.8   | 3759   |
| 7  | 510.6418 | 1.9   | 2550   |
| 8  | 511.1425 | 0.9   | 1197   |
| 9  | 518.1320 | 16.0  | 21094  |
| 10 | 518.6338 | 9.5   | 12592  |
| 11 | 519.1331 | 4.7   | 6224   |
| 12 | 519.6341 | 1.9   | 2539   |
| 13 | 531.9220 | 1.1   | 1450   |
| 14 | 531.9477 | 1.5   | 1926   |
| 15 | 531.9853 | 1.6   | 2067   |
| 16 | 532.1355 | 100.0 | 132093 |
| 17 | 532.2132 | 0.8   | 1089   |
| 18 | 532.2333 | 0.8   | 1060   |
| 19 | 532.2528 | 0.9   | 1127   |
| 20 | 532.2677 | 0.8   | 1118   |
| 21 | 532.3016 | 1.1   | 1392   |
| 22 | 532.3519 | 1.1   | 1486   |
| 23 | 532.3656 | 1.3   | 1749   |
| 24 | 532.4041 | 1.3   | 1674   |
| 25 | 532.4075 | 1.3   | 1705   |
| 26 | 532.4178 | 1.2   | 1542   |
| 27 | 532.4658 | 1.6   | 2120   |
| 28 | 532.4898 | 1.5   | 2023   |
| 29 | 532.5078 | 1.7   | 2202   |
| 30 | 532.6367 | 63.0  | 83190  |
| 31 | 532.7819 | 0.8   | 1075   |
| 32 | 532.8087 | 0.8   | 997    |
| 33 | 532.8363 | 0.8   | 1083   |
| 34 | 532.8613 | 1.0   | 1262   |
| 35 | 532.8740 | 0.8   | 1047   |
| 36 | 532.8998 | 0.9   | 1171   |
| 37 | 532.9191 | 0.9   | 1123   |
| 38 | 532.9430 | 0.9   | 1233   |
| 39 | 532.9493 | 0.9   | 1212   |
| 40 | 532.9695 | 1.0   | 1292   |
| 41 | 532.9929 | 1.0   | 1363   |
| 42 | 533.0064 | 1.0   | 1305   |
| 43 | 533.0309 | 1.0   | 1352   |
| 44 | 533.1366 | 31.9  | 42148  |
| 45 | 533.5701 | 0.8   | 1050   |
| 46 | 533.6364 | 10.8  | 14232  |
| 47 | 534.1361 | 3.6   | 4747   |
| 48 | 534.6382 | 1.1   | 1431   |
| 49 | 541.0995 | 1.5   | 2020   |
| 50 | 541.5996 | 0.9   | 1162   |
| 51 | 542.0981 | 1.2   | 1581   |
| 52 | 543.1246 | 2.1   | 2750   |
| 53 | 543.6279 | 1.2   | 1648   |
| 54 | 551.1415 | 2.8   | 3737   |
| 55 | 551.6429 | 1.5   | 1959   |
| 56 | 552.1448 | 0.9   | 1214   |
| 57 | 563.0918 | 5.3   | 7048   |
| 58 | 563.5942 | 3.6   | 4699   |
| 59 | 564.0925 | 5.4   | 7078   |
| 60 | 564.5909 | 2.9   | 3820   |
| 61 | 565.0903 | 1.3   | 1716   |
| 62 | 585.0830 | 3.5   | 4560   |

# High Resolution Mass Spectrometry Report

| #   | m/z       | I %  | I     |
|-----|-----------|------|-------|
| 63  | 585.5854  | 2.3  | 2984  |
| 64  | 586.0836  | 3.7  | 4884  |
| 65  | 586.5848  | 2.3  | 3007  |
| 66  | 587.0830  | 0.9  | 1243  |
| 67  | 603.0713  | 0.8  | 1119  |
| 68  | 604.0711  | 1.1  | 1502  |
| 69  | 625.1655  | 1.9  | 2488  |
| 70  | 668.1698  | 1.6  | 2059  |
| 71  | 680.1705  | 2.2  | 2885  |
| 72  | 681.1711  | 1.0  | 1371  |
| 73  | 772.7077  | 0.9  | 1177  |
| 74  | 773.2081  | 1.0  | 1263  |
| 75  | 862.2431  | 3.7  | 4837  |
| 76  | 863.2452  | 2.1  | 2783  |
| 77  | 1065.2844 | 28.3 | 37417 |
| 78  | 1066.2877 | 17.9 | 23652 |
| 79  | 1067.2877 | 8.7  | 11526 |
| 80  | 1068.2884 | 3.3  | 4301  |
| 81  | 1069.2875 | 1.1  | 1489  |
| 82  | 1087.2672 | 12.1 | 15940 |
| 83  | 1088.2700 | 7.9  | 10396 |
| 84  | 1089.2698 | 3.8  | 4966  |
| 85  | 1090.2751 | 1.4  | 1810  |
| 86  | 1103.2410 | 0.8  | 1017  |
| 87  | 1126.2010 | 9.4  | 12461 |
| 88  | 1127.2085 | 22.4 | 29567 |
| 89  | 1128.2076 | 17.0 | 22492 |
| 90  | 1129.2082 | 15.7 | 20675 |
| 91  | 1130.2092 | 8.1  | 10678 |
| 92  | 1131.2093 | 3.4  | 4553  |
| 93  | 1132.2065 | 1.4  | 1788  |
| 94  | 1171.1876 | 21.8 | 28852 |
| 95  | 1172.1885 | 13.9 | 18345 |
| 96  | 1173.1869 | 26.1 | 34536 |
| 97  | 1174.1898 | 15.0 | 19860 |
| 98  | 1175.1891 | 7.2  | 9490  |
| 99  | 1176.1886 | 2.8  | 3678  |
| 100 | 1177.1943 | 0.8  | 1101  |

## Acquisition Parameter

|                   |                              |                |                                       |                |              |           |
|-------------------|------------------------------|----------------|---------------------------------------|----------------|--------------|-----------|
| <b>General</b>    | Fore Vacuum                  | 2.61e+000 mBar | High Vacuum                           | 9.49e-008 mBar | Source Type  | ESI       |
|                   | Scan Begin                   | 100 m/z        | Scan End                              | 2400 m/z       | Ion Polarity | Negative  |
| <b>Source</b>     | Set Nebulizer                | 0.4 Bar        | Set Capillary                         | 4500 V         | Set Dry Gas  | 4.0 l/min |
|                   | Set Dry Heater               | 180 °C         | Set End Plate Offset                  | -500 V         |              |           |
| <b>Quadrupole</b> | Set Ion Energy ( MS only )   | -10.0 eV       |                                       |                |              |           |
| <b>Coll. Cell</b> | Collision Energy             | -20.0 eV       | Set Collision Cell RF                 | 500.0 Vpp      | 120.0 Vpp    |           |
| <b>Ion Cooler</b> | Set Ion Cooler Transfer Time | 140.0 µs       | Set Ion Cooler Pre Pulse Storage Time | 22.0 µs        |              |           |

## High Resolution Mass Spectrometry Report

Sample Name **JL-736 F3**

Instrument maXis 4G

Comment

Method ms\_nocolumn\_high\_pos\_use\_acn.m

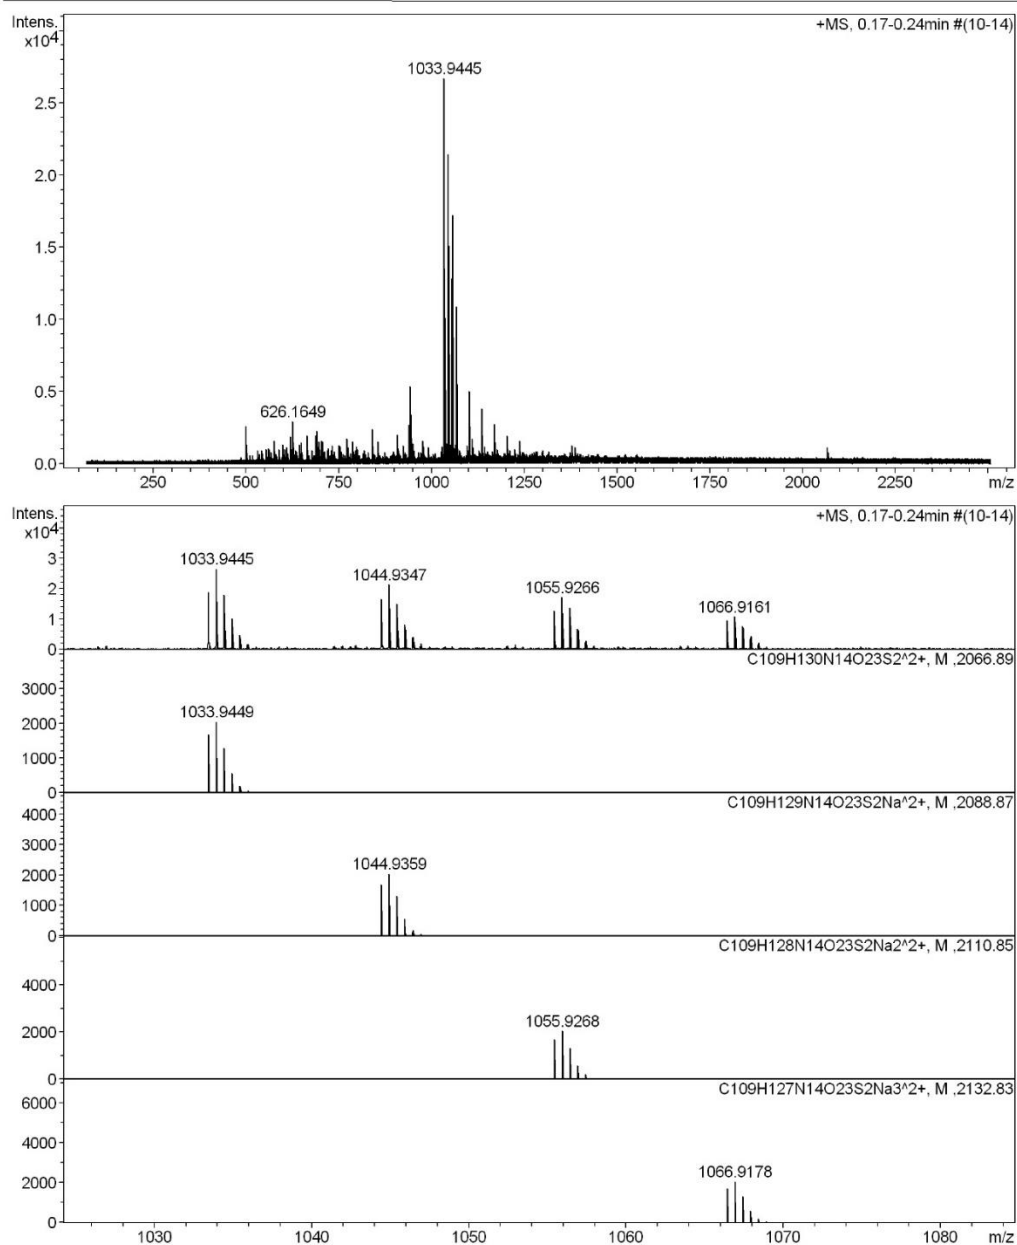

# High Resolution Mass Spectrometry Report

## Measured m/z vs. theoretical m/z

| Meas. m/z | # | Formula                        | Score  | m/z       | err [mDa] | err [ppm] | mSigma | rdb  | e <sup>-</sup> Conf | z  |
|-----------|---|--------------------------------|--------|-----------|-----------|-----------|--------|------|---------------------|----|
| 1033.4423 | 1 | C 109 H 130 N 14 O 23 S 2      | 100.00 | 1033.4432 | 0.9       | 0.8       | 37.1   | 52.0 | even                | 2+ |
| 1044.4337 | 1 | C 109 H 129 N 14 Na O 23 S 2   | 100.00 | 1044.4342 | 0.5       | 0.5       | 19.2   | 52.0 | even                |    |
| 1055.4252 | 1 | C 109 H 128 N 14 Na 2 O 23 S 2 | 100.00 | 1055.4251 | -0.0      | -0.0      | 29.5   | 52.0 | even                |    |
| 1066.4152 | 1 | C 109 H 127 N 14 Na 3 O 23 S 2 | 100.00 | 1066.4161 | 0.9       | 0.8       | 50.1   | 52.0 | even                |    |

## Mass list

| #  | m/z       | I %   | I     |
|----|-----------|-------|-------|
| 1  | 500.3006  | 9.8   | 2625  |
| 2  | 500.8020  | 6.7   | 1788  |
| 3  | 575.4121  | 6.2   | 1660  |
| 4  | 599.3246  | 5.0   | 1332  |
| 5  | 610.1836  | 4.3   | 1149  |
| 6  | 619.4375  | 7.0   | 1859  |
| 7  | 626.1649  | 11.1  | 2970  |
| 8  | 643.3518  | 5.2   | 1378  |
| 9  | 648.1459  | 4.3   | 1138  |
| 10 | 649.4489  | 5.5   | 1467  |
| 11 | 663.4644  | 7.3   | 1947  |
| 12 | 687.3772  | 5.1   | 1361  |
| 13 | 689.2982  | 7.4   | 1969  |
| 14 | 689.6319  | 8.6   | 2305  |
| 15 | 689.9655  | 7.9   | 2109  |
| 16 | 690.2987  | 4.6   | 1221  |
| 17 | 696.6248  | 4.6   | 1234  |
| 18 | 696.9577  | 5.9   | 1586  |
| 19 | 702.8626  | 6.0   | 1616  |
| 20 | 707.4898  | 6.0   | 1592  |
| 21 | 751.5148  | 4.4   | 1175  |
| 22 | 752.1647  | 4.8   | 1279  |
| 23 | 770.8495  | 6.6   | 1754  |
| 24 | 774.1461  | 4.4   | 1174  |
| 25 | 787.8413  | 5.9   | 1590  |
| 26 | 797.5937  | 4.7   | 1245  |
| 27 | 838.8357  | 9.2   | 2460  |
| 28 | 855.8276  | 5.7   | 1533  |
| 29 | 906.8236  | 7.5   | 2008  |
| 30 | 923.8141  | 5.0   | 1327  |
| 31 | 940.2554  | 10.0  | 2683  |
| 32 | 941.2570  | 10.2  | 2713  |
| 33 | 942.2529  | 20.2  | 5385  |
| 34 | 943.2548  | 12.8  | 3424  |
| 35 | 944.2533  | 12.5  | 3339  |
| 36 | 945.2519  | 5.3   | 1419  |
| 37 | 949.5597  | 5.2   | 1398  |
| 38 | 974.8116  | 6.2   | 1651  |
| 39 | 1033.4423 | 71.5  | 19112 |
| 40 | 1033.9445 | 100.0 | 26723 |
| 41 | 1034.4455 | 67.6  | 18053 |
| 42 | 1034.9455 | 38.1  | 10176 |
| 43 | 1035.4467 | 17.9  | 4791  |
| 44 | 1035.9463 | 6.5   | 1737  |
| 45 | 1041.9393 | 5.5   | 1459  |
| 46 | 1042.7996 | 5.5   | 1475  |
| 47 | 1044.4337 | 63.1  | 16851 |
| 48 | 1044.5062 | 6.0   | 1601  |
| 49 | 1044.9347 | 80.3  | 21465 |
| 50 | 1045.4362 | 56.8  | 15170 |
| 51 | 1045.5073 | 4.7   | 1249  |
| 52 | 1045.9359 | 31.6  | 8442  |
| 53 | 1046.4368 | 15.4  | 4114  |
| 54 | 1046.5086 | 6.3   | 1672  |
| 55 | 1046.9372 | 7.1   | 1901  |
| 56 | 1052.4292 | 5.1   | 1371  |
| 57 | 1052.9277 | 6.9   | 1833  |
| 58 | 1055.4252 | 48.0  | 12833 |
| 59 | 1055.9266 | 64.4  | 17215 |

## High Resolution Mass Spectrometry Report

| #  | m/z       | I %  | I     |
|----|-----------|------|-------|
| 60 | 1056.4267 | 51.3 | 13697 |
| 61 | 1056.9272 | 25.6 | 6834  |
| 62 | 1057.4296 | 11.6 | 3111  |
| 63 | 1057.9295 | 5.3  | 1418  |
| 64 | 1063.9188 | 5.0  | 1333  |
| 65 | 1066.4152 | 36.1 | 9653  |
| 66 | 1066.9161 | 40.9 | 10924 |
| 67 | 1067.4179 | 28.9 | 7714  |
| 68 | 1067.9190 | 17.1 | 4568  |
| 69 | 1068.4184 | 9.2  | 2465  |
| 70 | 1095.8981 | 4.9  | 1304  |
| 71 | 1100.4101 | 14.8 | 3952  |
| 72 | 1100.9108 | 18.9 | 5049  |
| 73 | 1101.4111 | 12.7 | 3406  |
| 74 | 1101.9136 | 8.8  | 2359  |
| 75 | 1108.9028 | 6.0  | 1613  |
| 76 | 1109.4034 | 6.5  | 1734  |
| 77 | 1109.9046 | 5.6  | 1493  |
| 78 | 1134.4044 | 11.9 | 3186  |
| 79 | 1134.9047 | 14.4 | 3852  |
| 80 | 1135.4048 | 10.5 | 2795  |
| 81 | 1135.9081 | 7.1  | 1887  |
| 82 | 1168.3980 | 7.2  | 1928  |
| 83 | 1168.8983 | 10.4 | 2777  |
| 84 | 1169.3981 | 7.8  | 2091  |
| 85 | 1169.8987 | 5.6  | 1502  |
| 86 | 1202.3899 | 5.2  | 1388  |
| 87 | 1202.8911 | 7.3  | 1963  |
| 88 | 1236.8864 | 6.1  | 1626  |
| 89 | 1378.5910 | 4.8  | 1286  |

### Acquisition Parameter

|                   |                              |                |                                       |                |              |           |
|-------------------|------------------------------|----------------|---------------------------------------|----------------|--------------|-----------|
| <b>General</b>    | Fore Vacuum                  | 2.48e+000 mBar | High Vacuum                           | 1.03e-007 mBar | Source Type  | ESI       |
|                   | Scan Begin                   | 75 m/z         | Scan End                              | 2500 m/z       | Ion Polarity | Positive  |
| <b>Source</b>     | Set Nebulizer                | 2.0 Bar        | Set Capillary                         | 4500 V         | Set Dry Gas  | 8.0 l/min |
|                   | Set Dry Heater               | 200 °C         | Set End Plate Offset                  | -500 V         |              |           |
| <b>Quadrupole</b> | Set Ion Energy ( MS only )   | 4.0 eV         |                                       |                |              |           |
| <b>Coll. Cell</b> | Collision Energy             | 12.0 eV        | Set Collision Cell RF                 | 2000.0 Vpp     | 800.0 Vpp    |           |
| <b>Ion Cooler</b> | Set Ion Cooler Transfer Time | 120.0 µs       | Set Ion Cooler Pre Pulse Storage Time | 18.0 µs        |              |           |
